# Supplementary material for: 14-3-3η Induces a Multidrug-Resistant Phenotype in Rheumatoid Arthritis via p53 Dysregulation: Insights from AIA Models
Source: Research Square preprint supplement (doi:10.21203/rs.3.rs-6528370/v1), 2025-05-07
Supplement: Supplementary file 1 [file 6a0d0cf0c4a7c4a430914bab.docx]

**Western Blots original images**

**Figure 4**

**C**


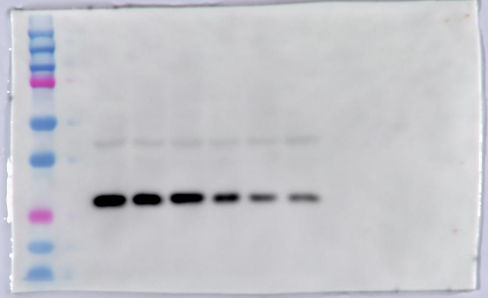


**14-3-3η**


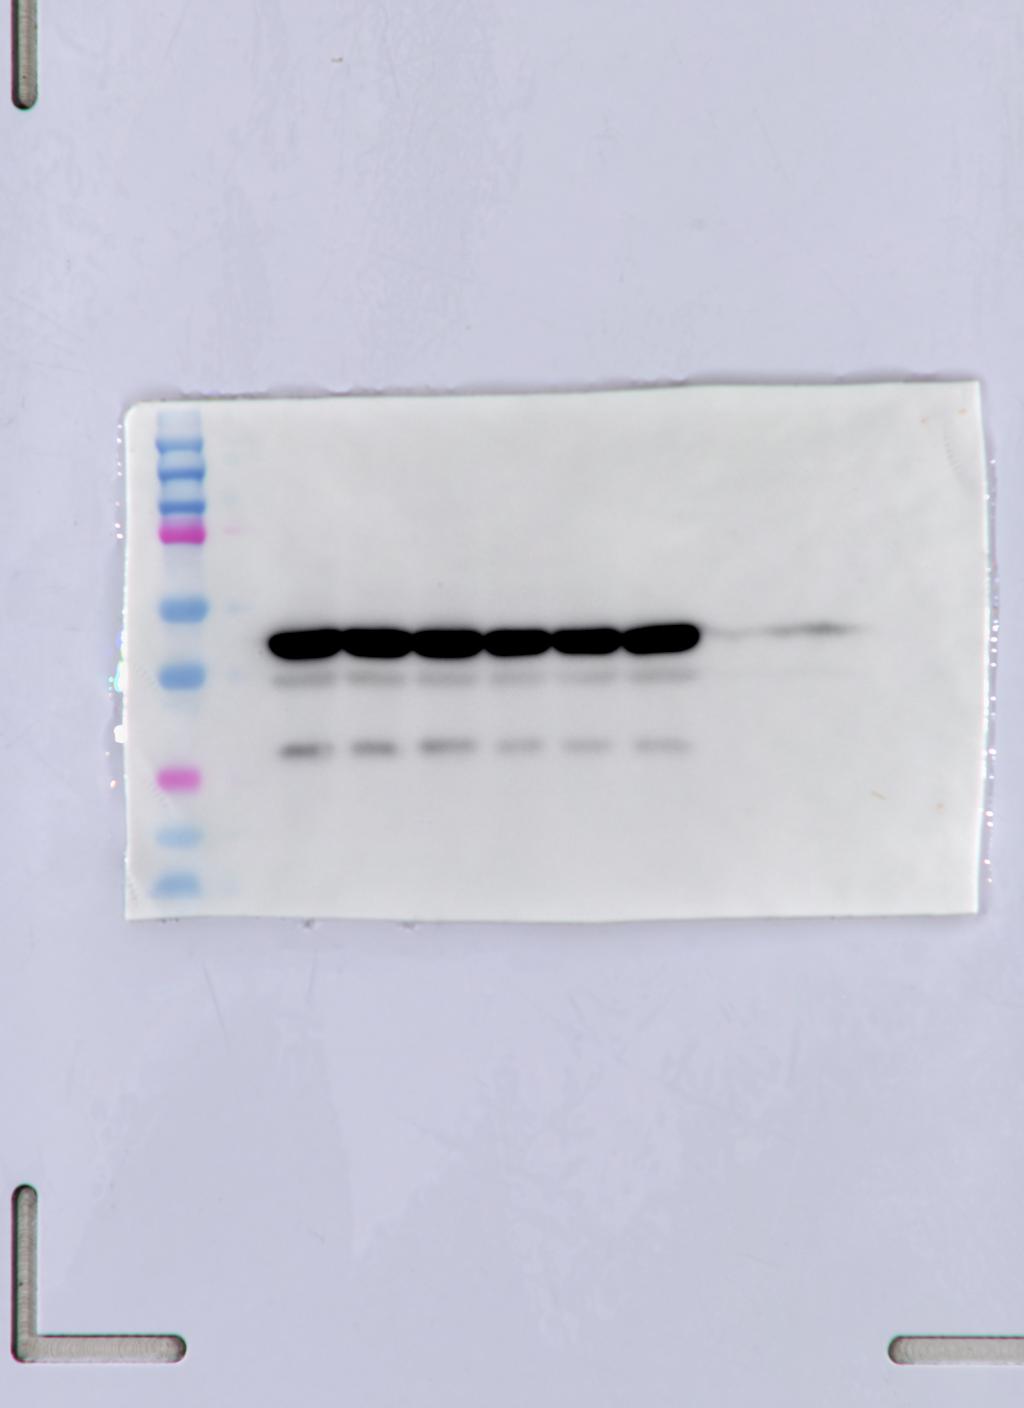


**β-actin**

**E**

**Ubiquitin**

**
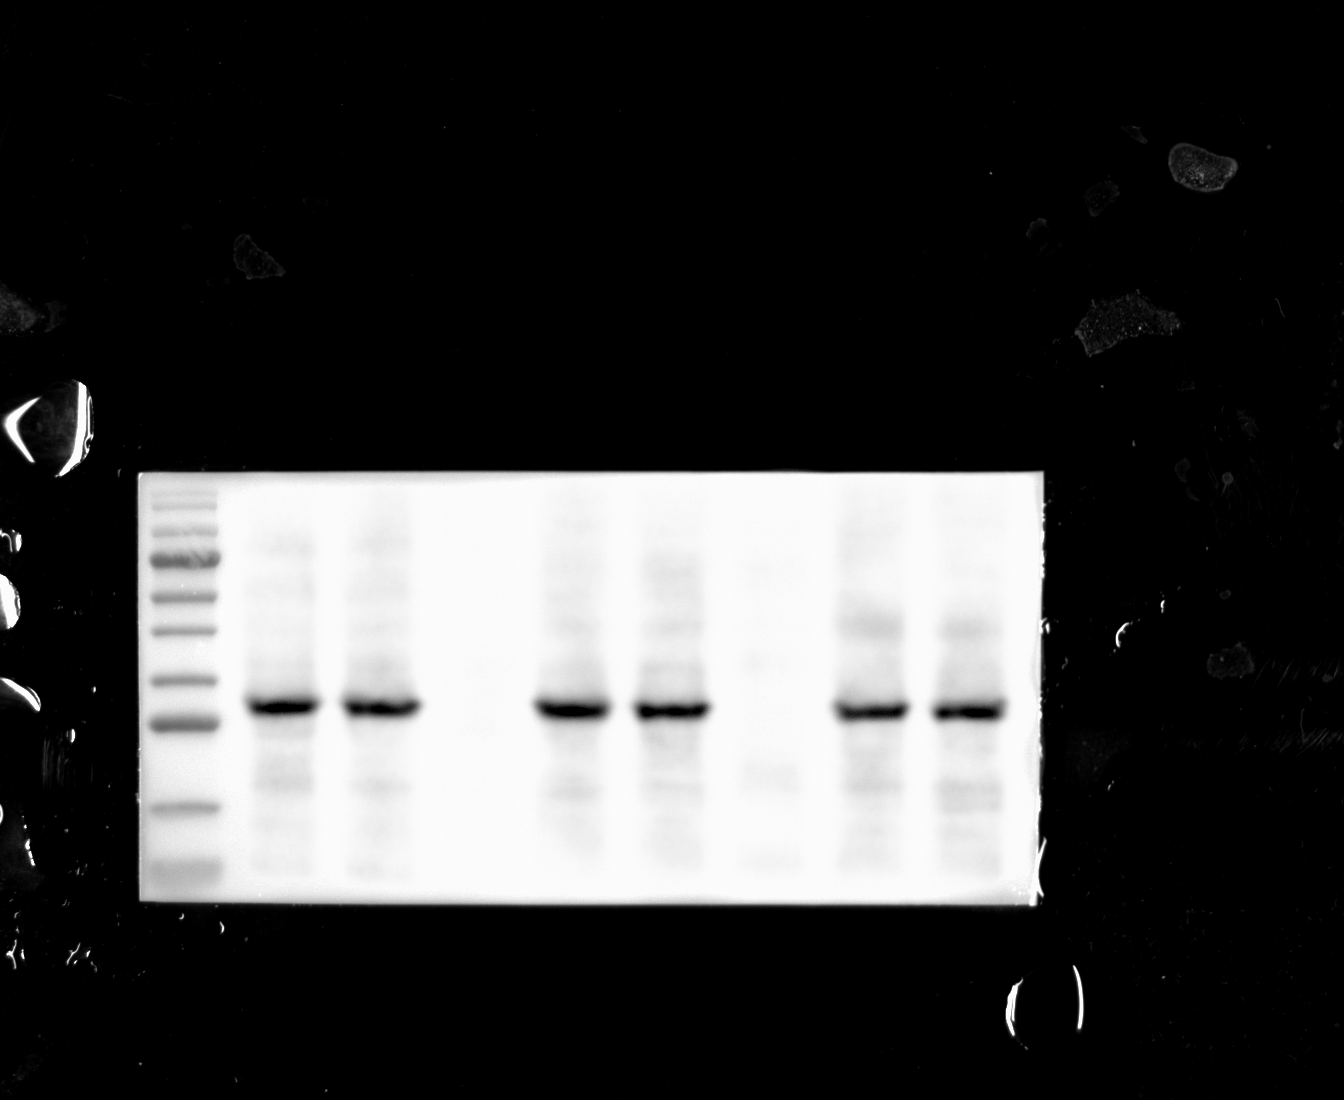

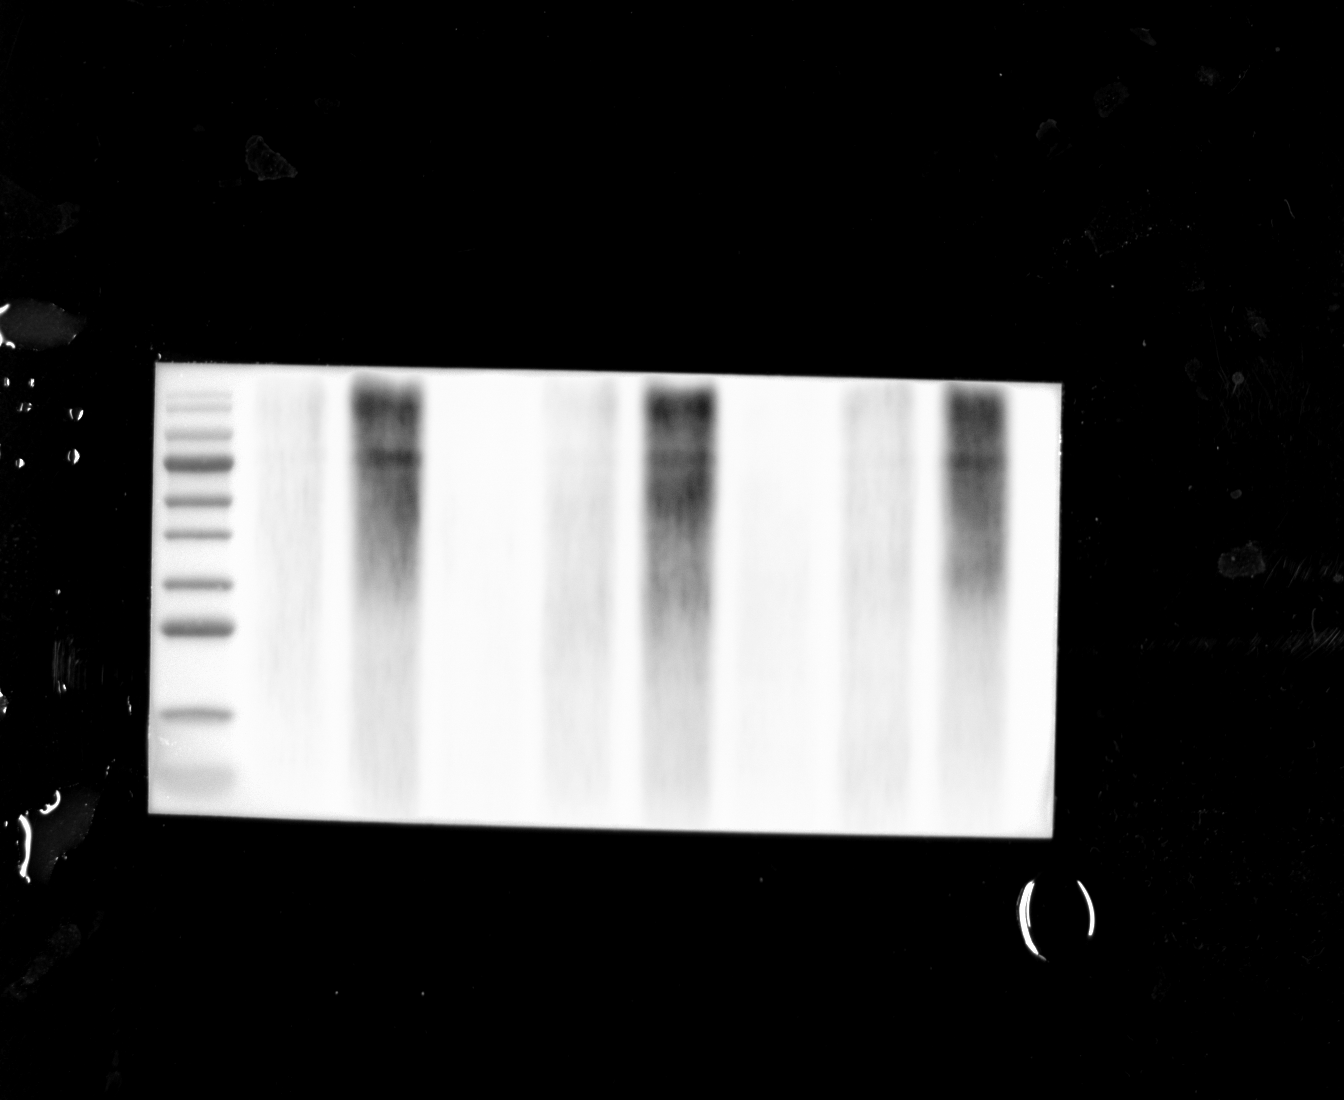
**

**14-3-3η**

**
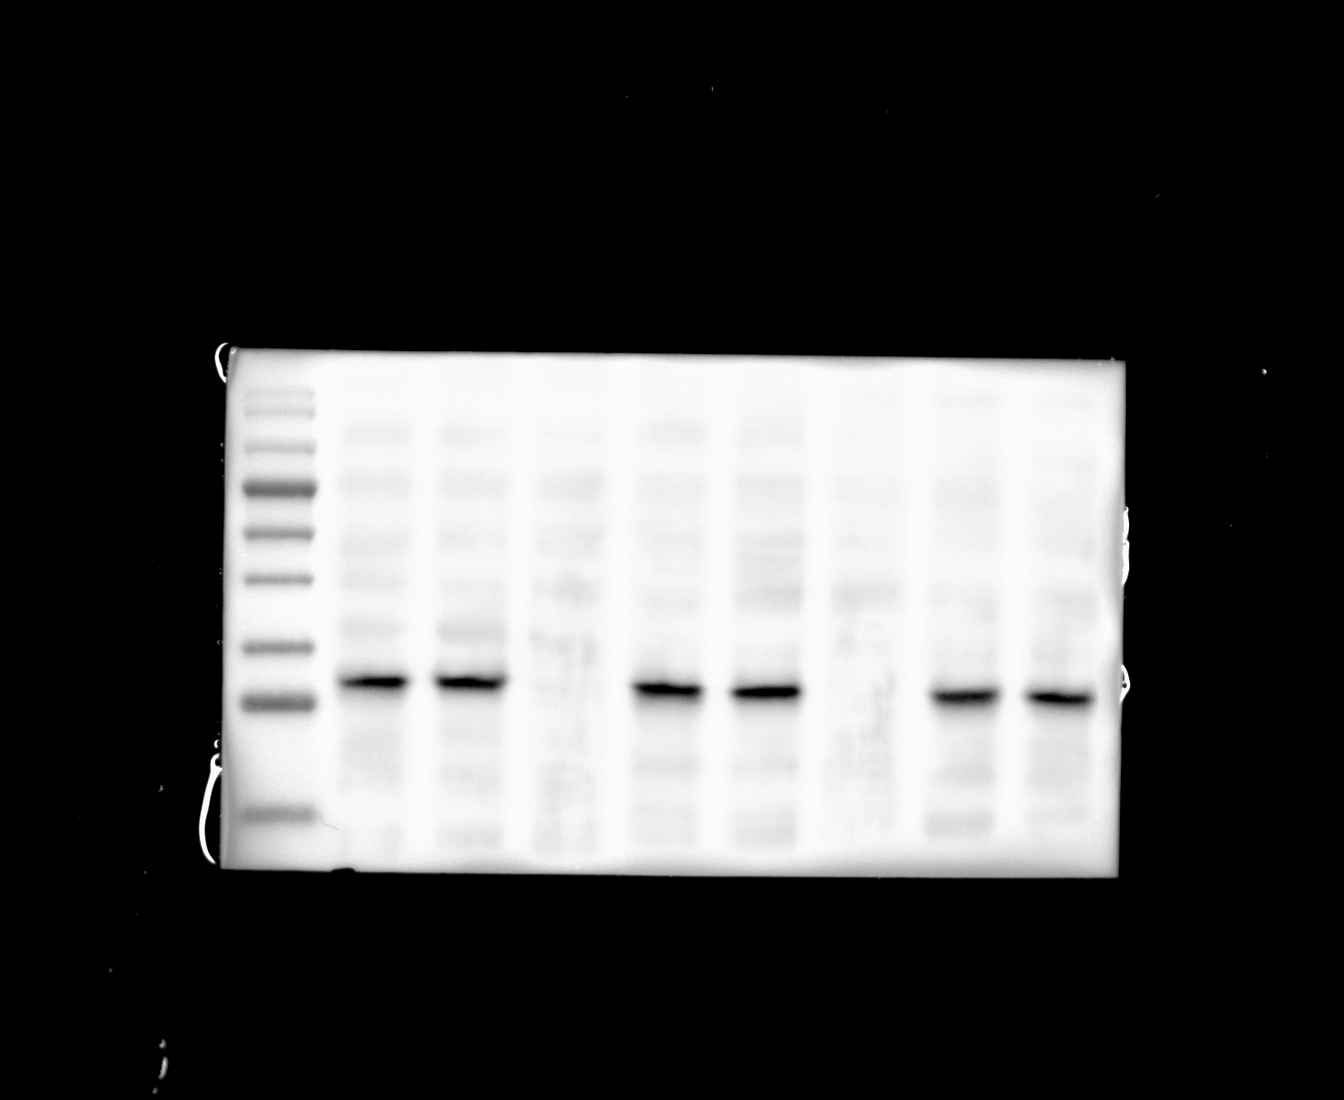
**

**
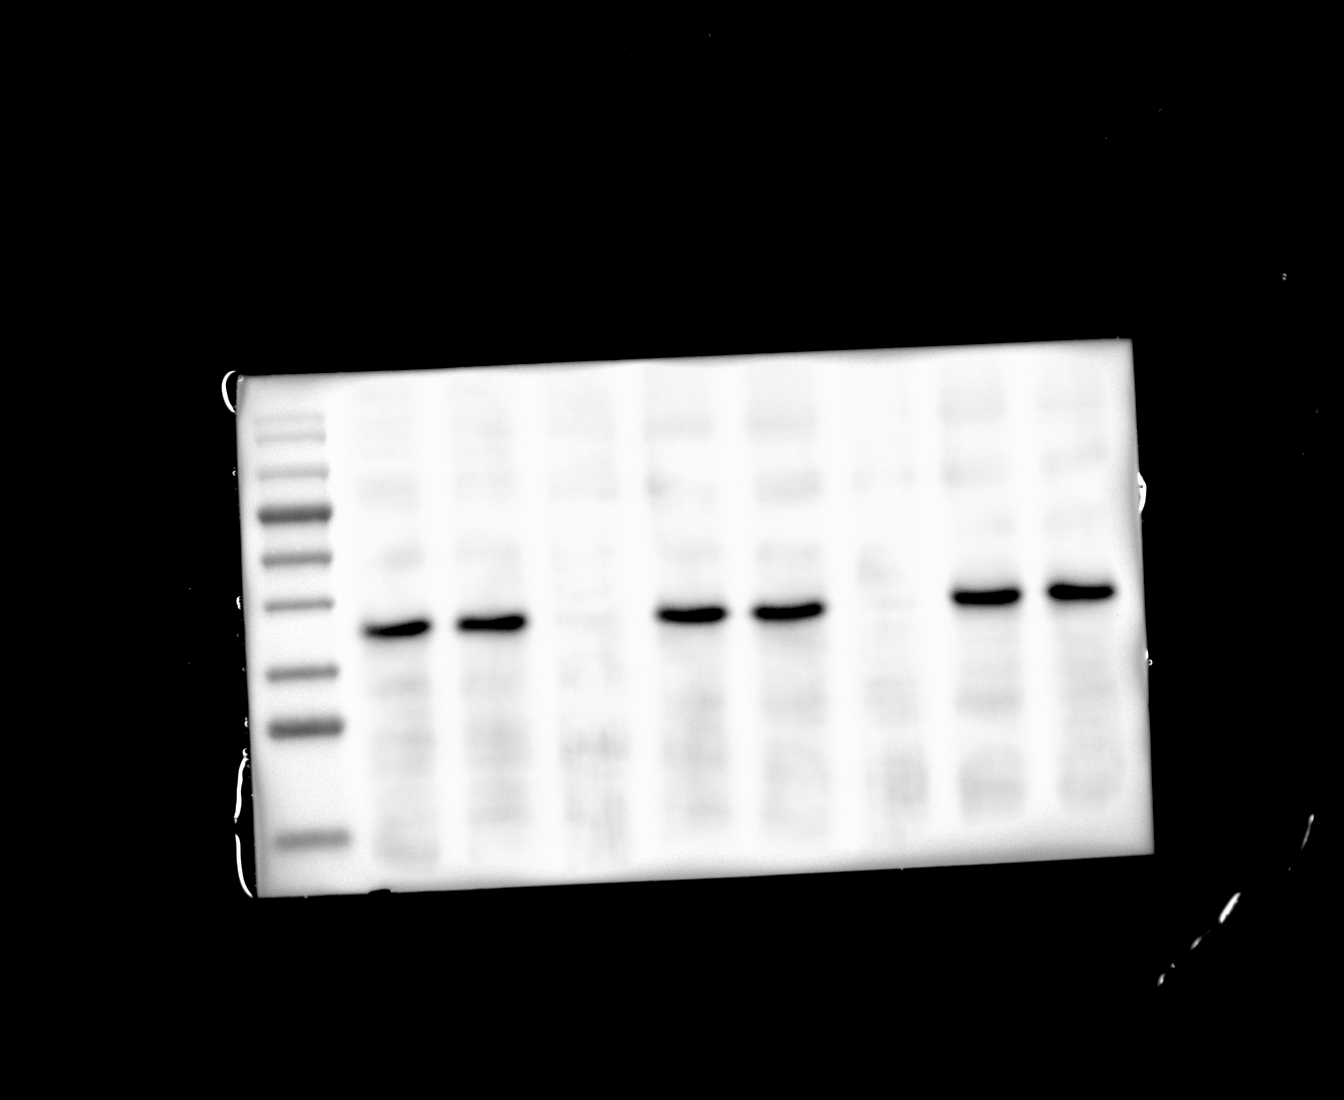
**

**β-actin**

**14-3-3η**

**Figure 5**

**A** **B**


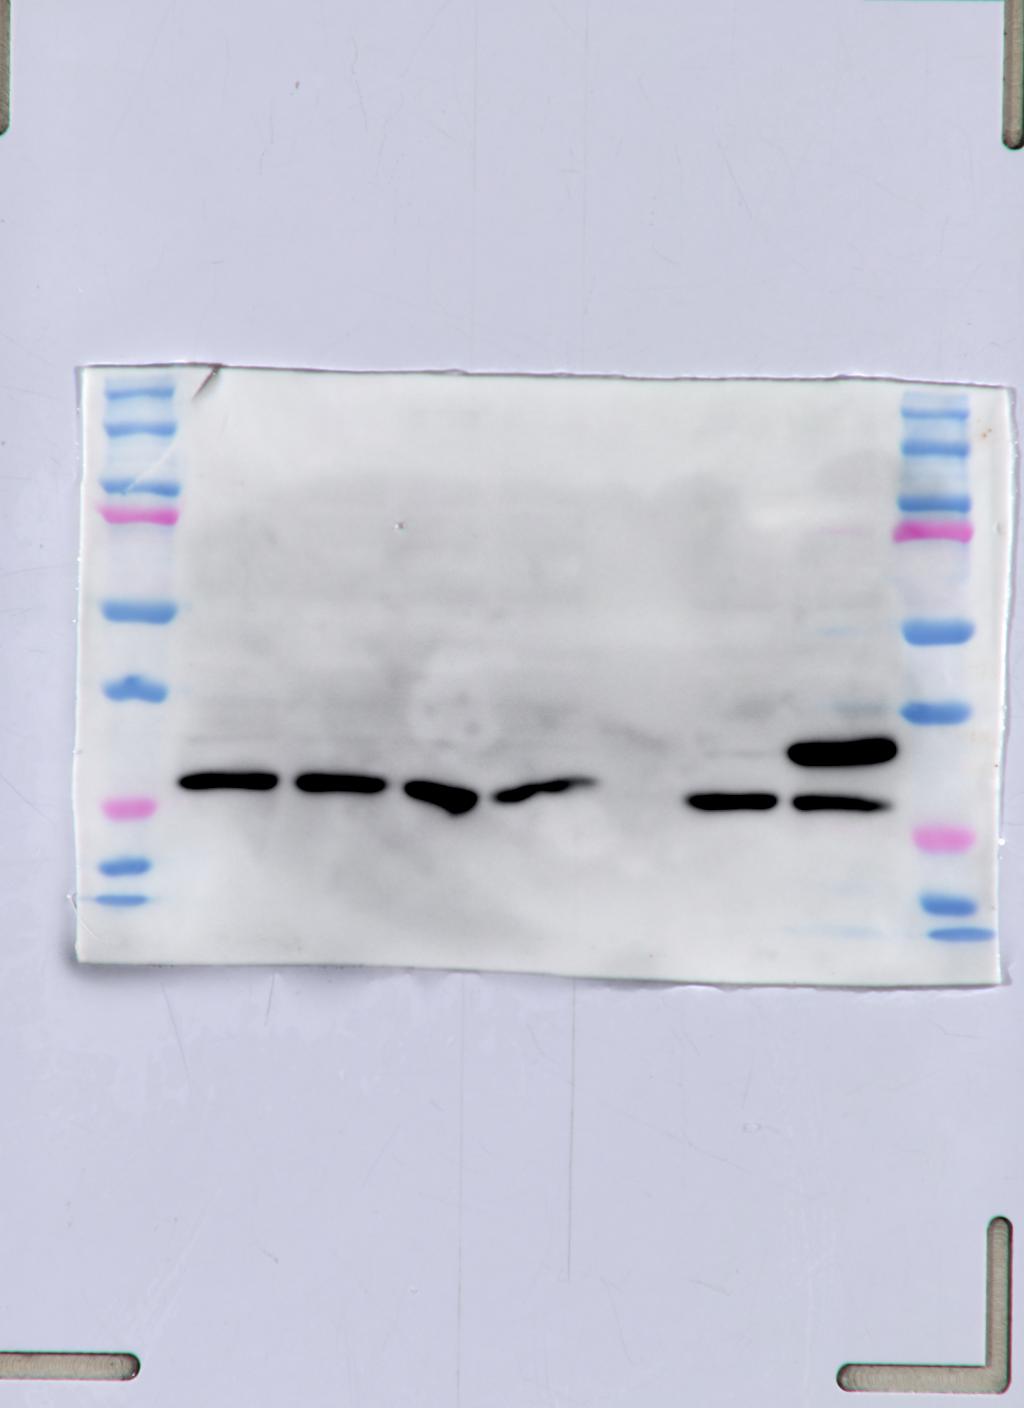


**14-3-3η-Flag**


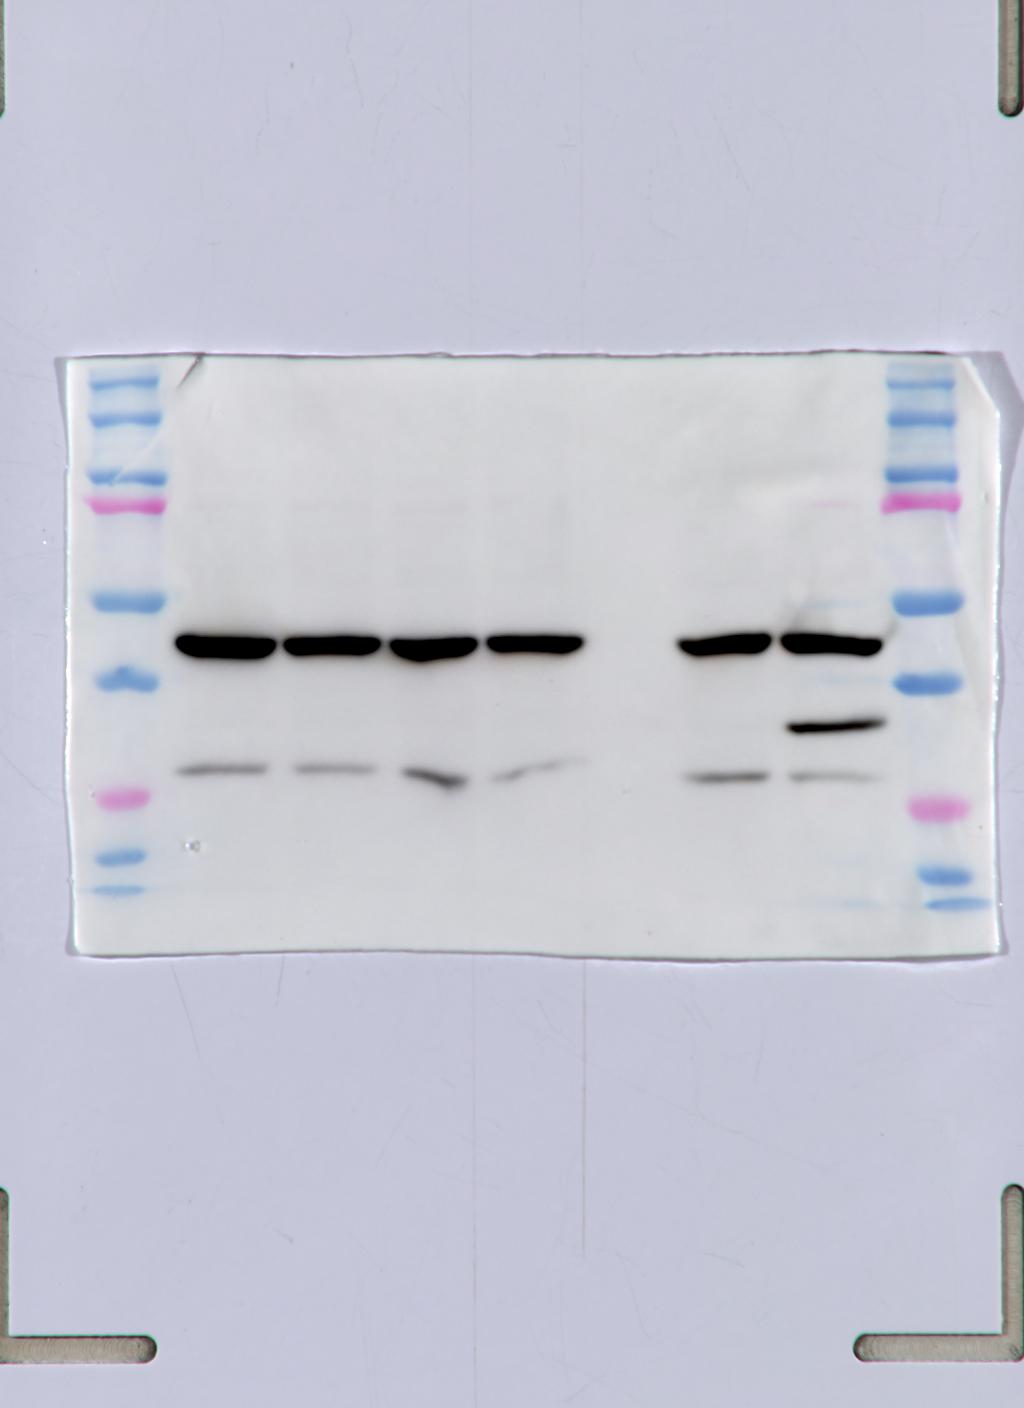


**β-actin**


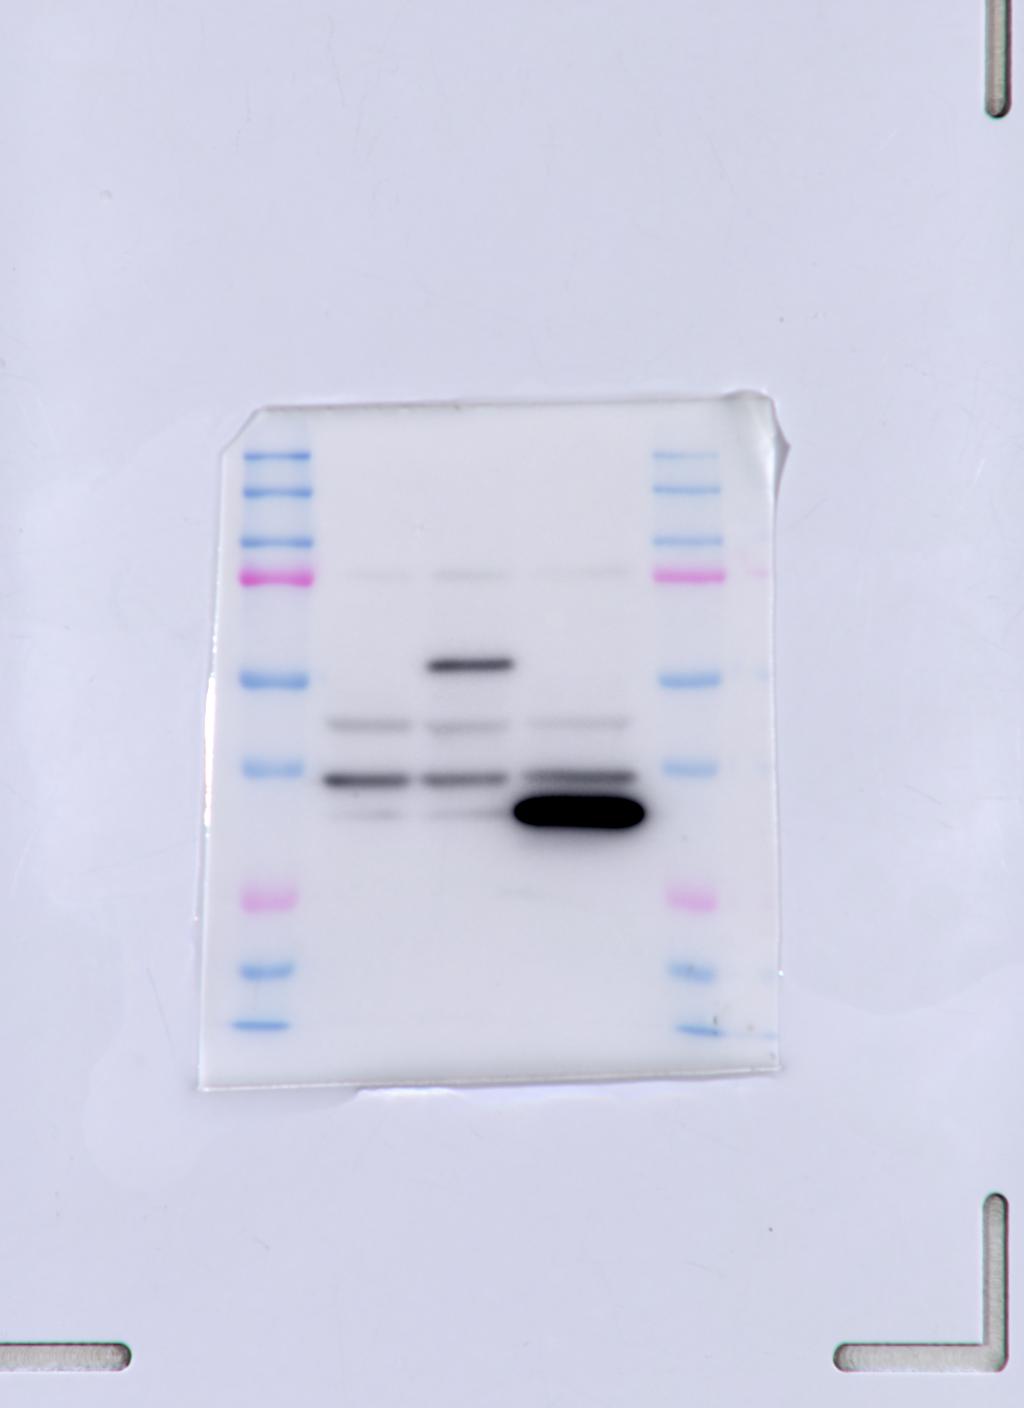

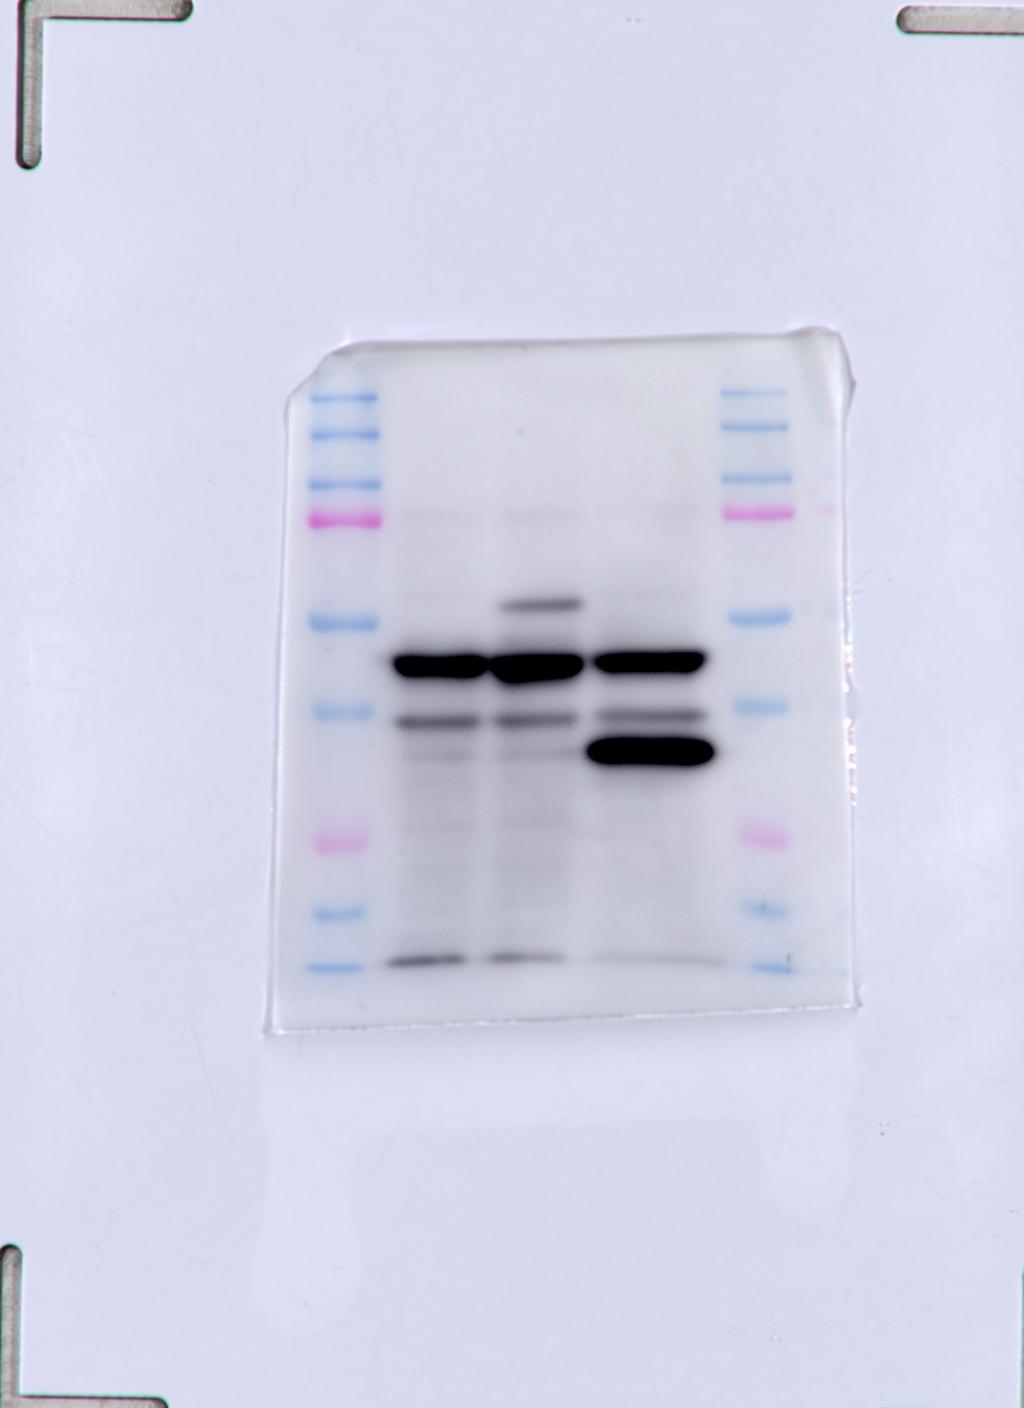


**14-3-3η-flag**

**actin**

**C**

**
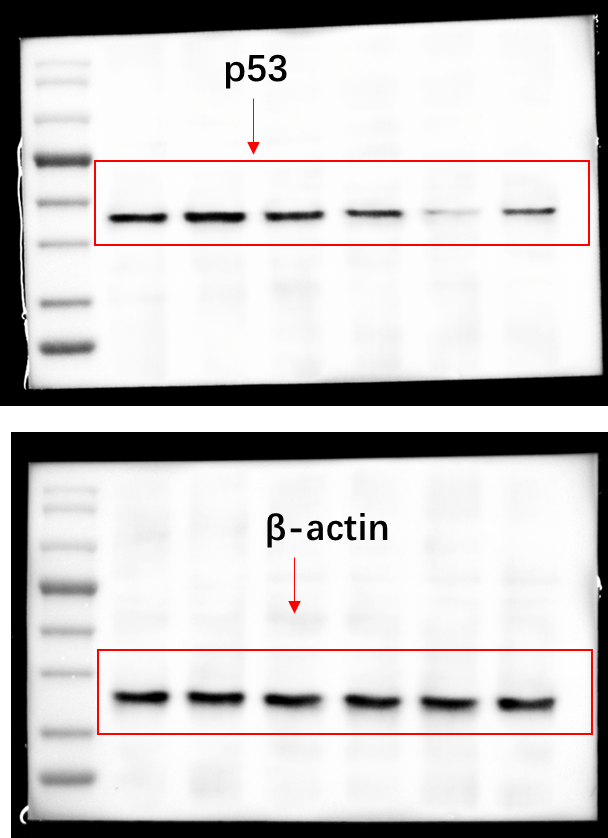
**

**D**

**
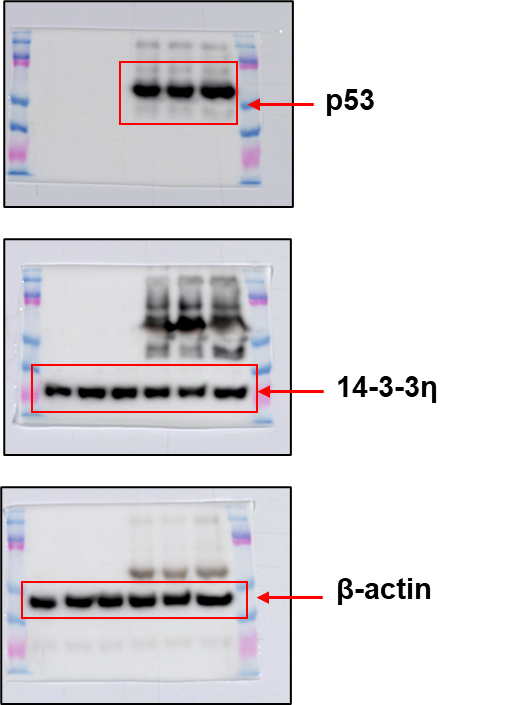
**

**E**

**
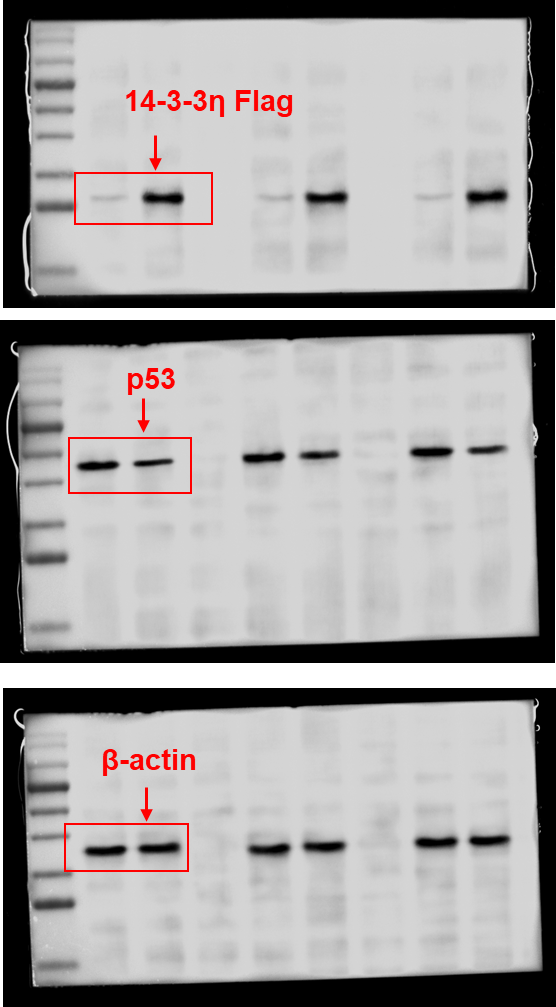
**

**
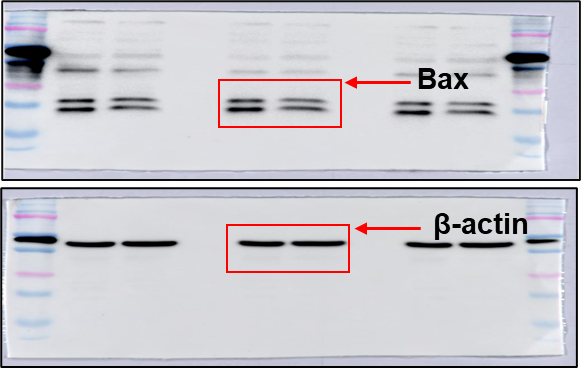
**

**
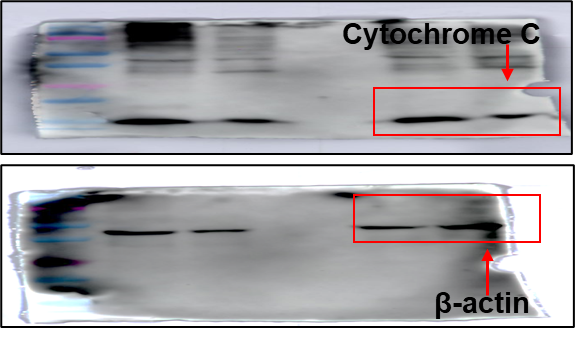
**

**
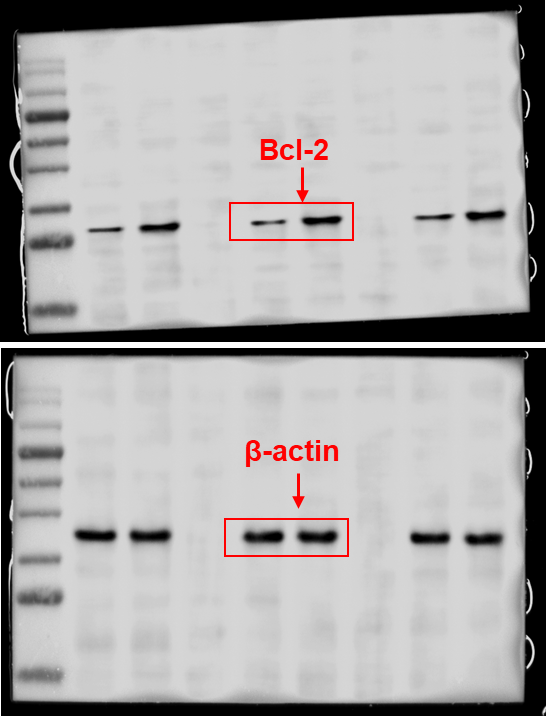
**

**
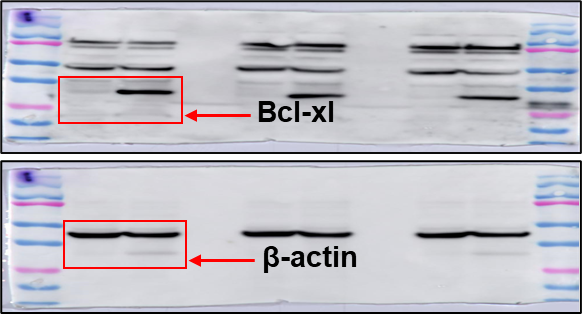
**

**F**

**
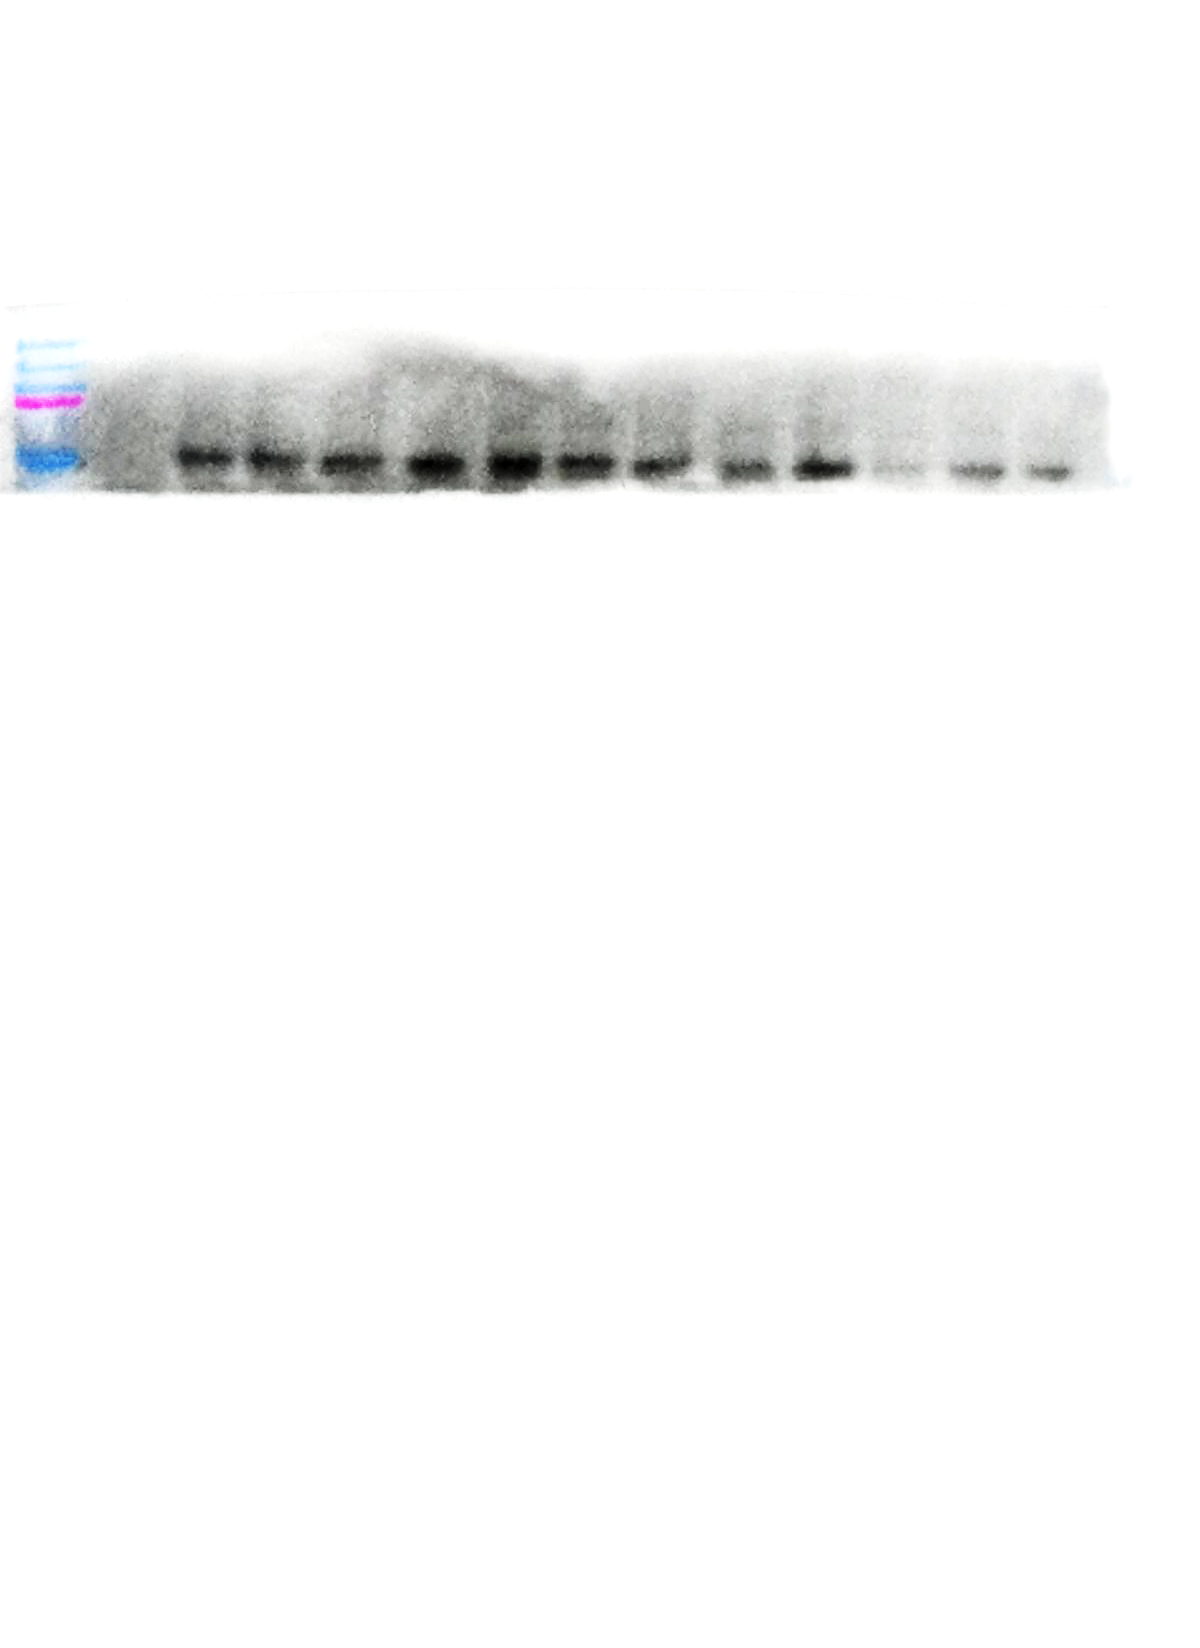

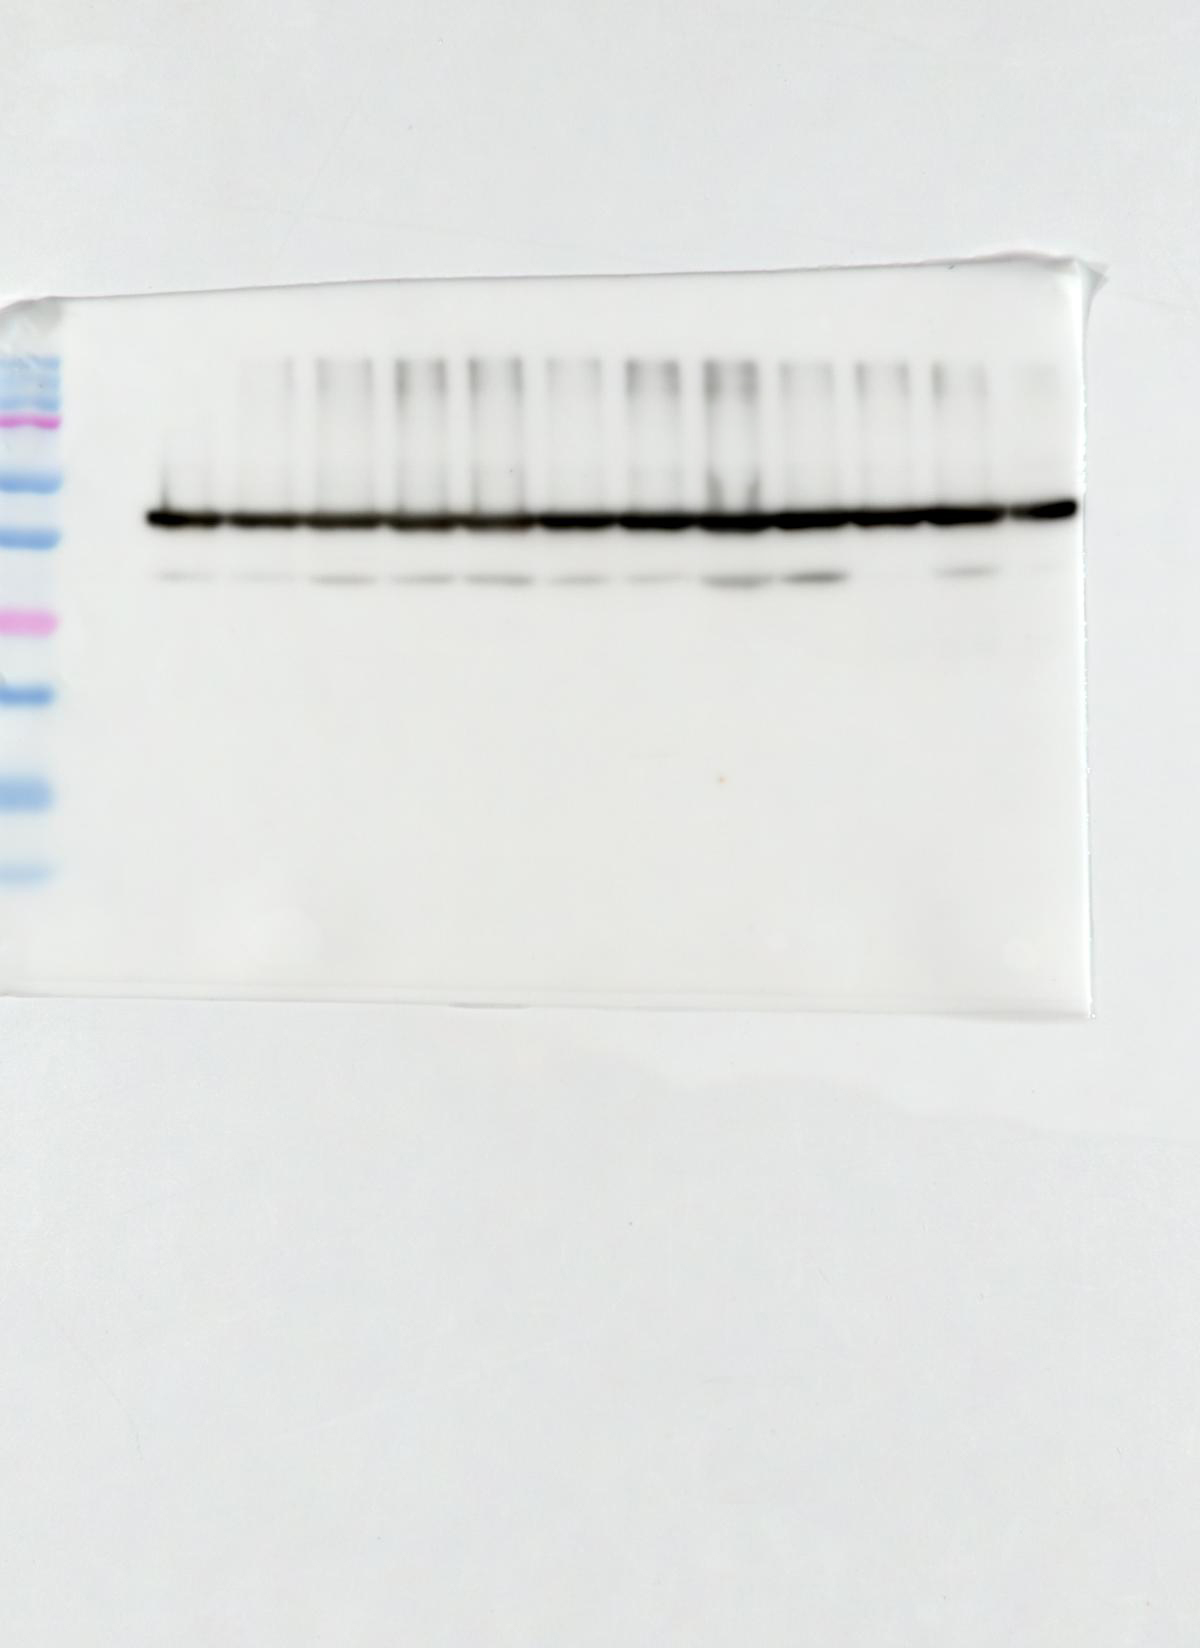
**

**GAPDH**

**G**


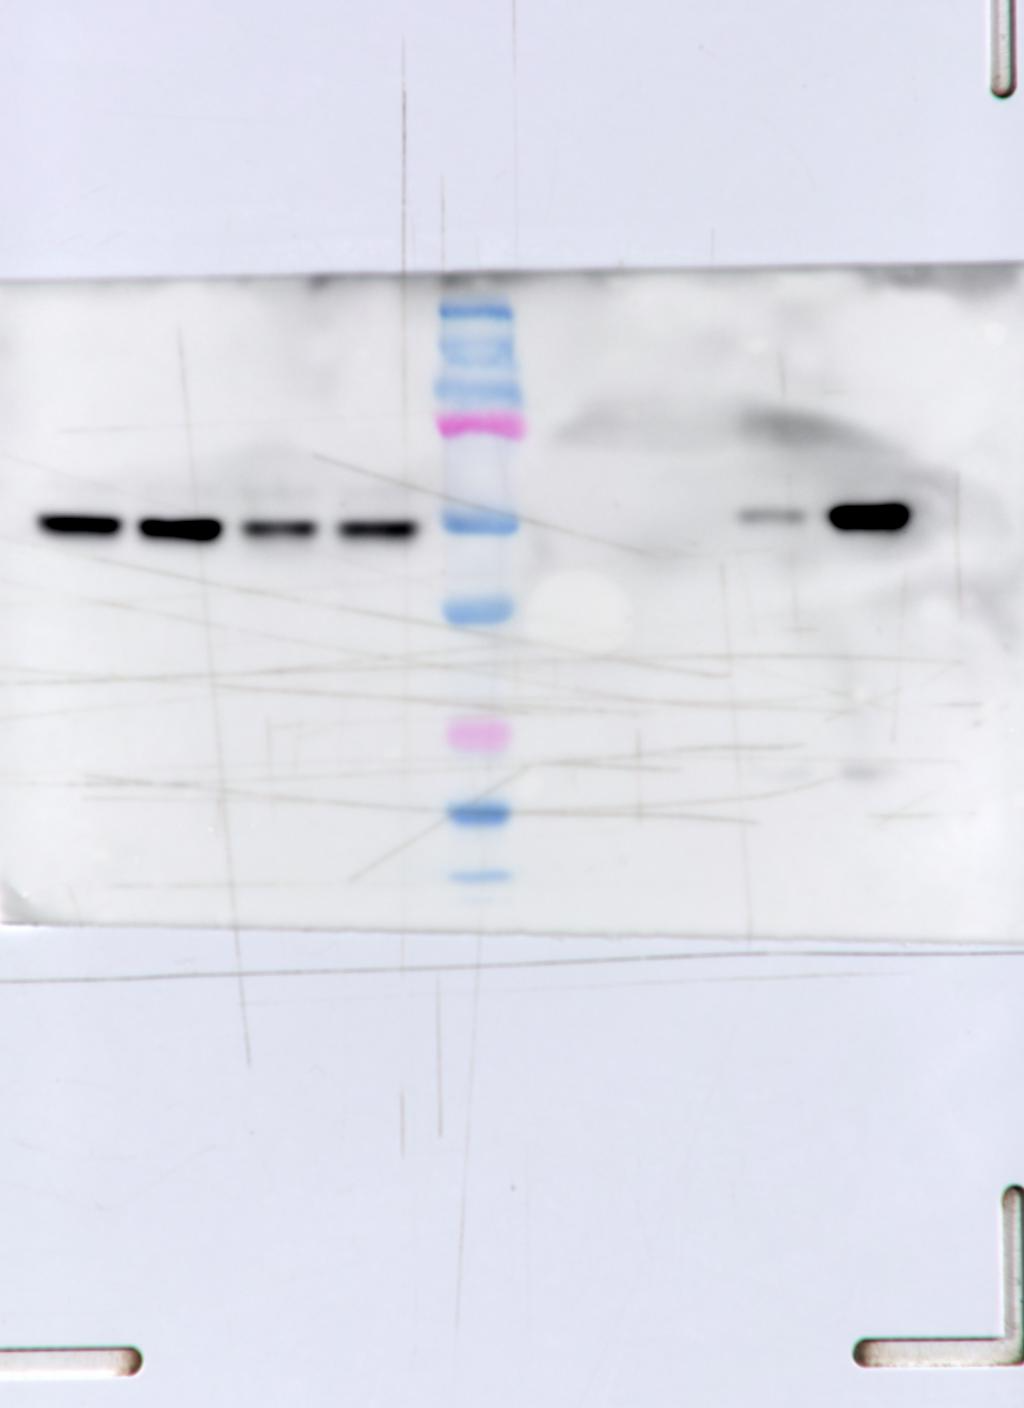


**p53**


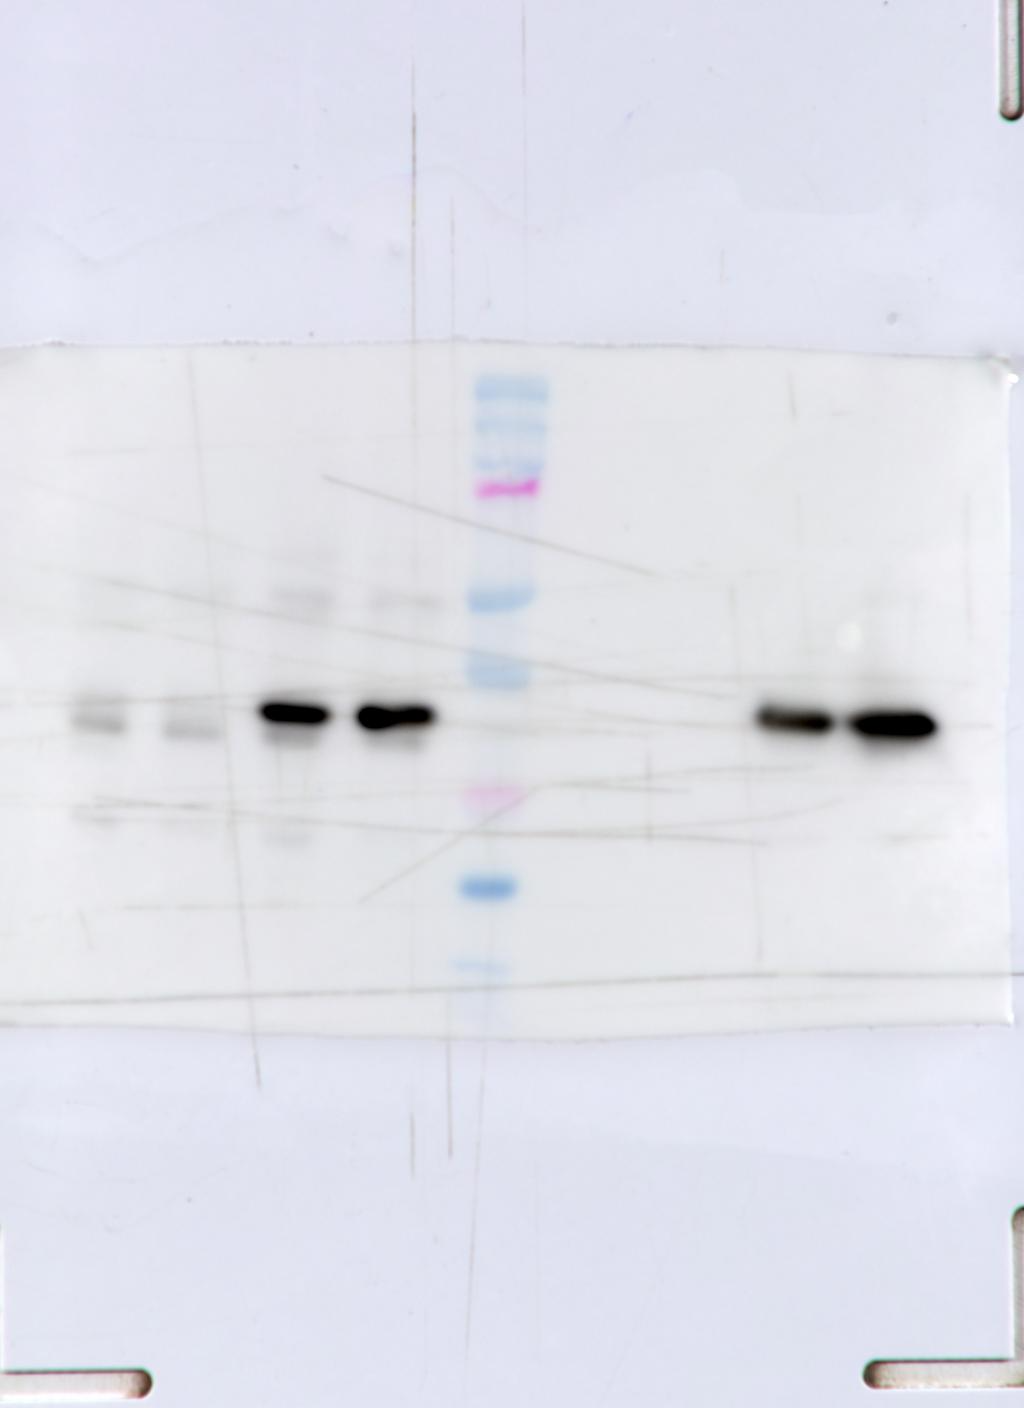

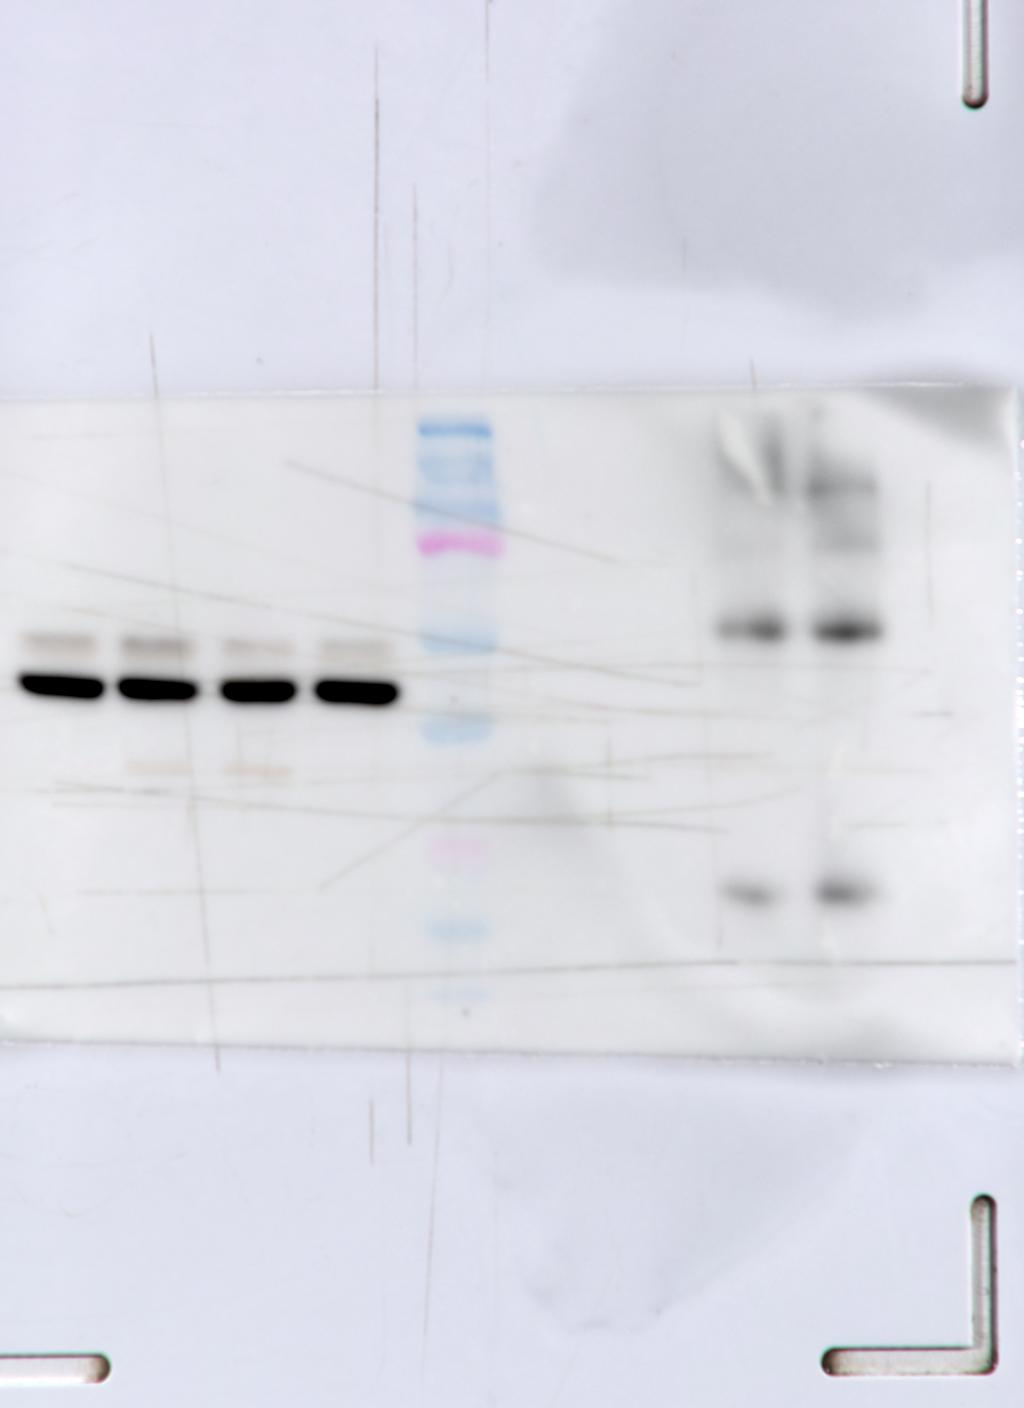


**14-3-3η**

**Actin**


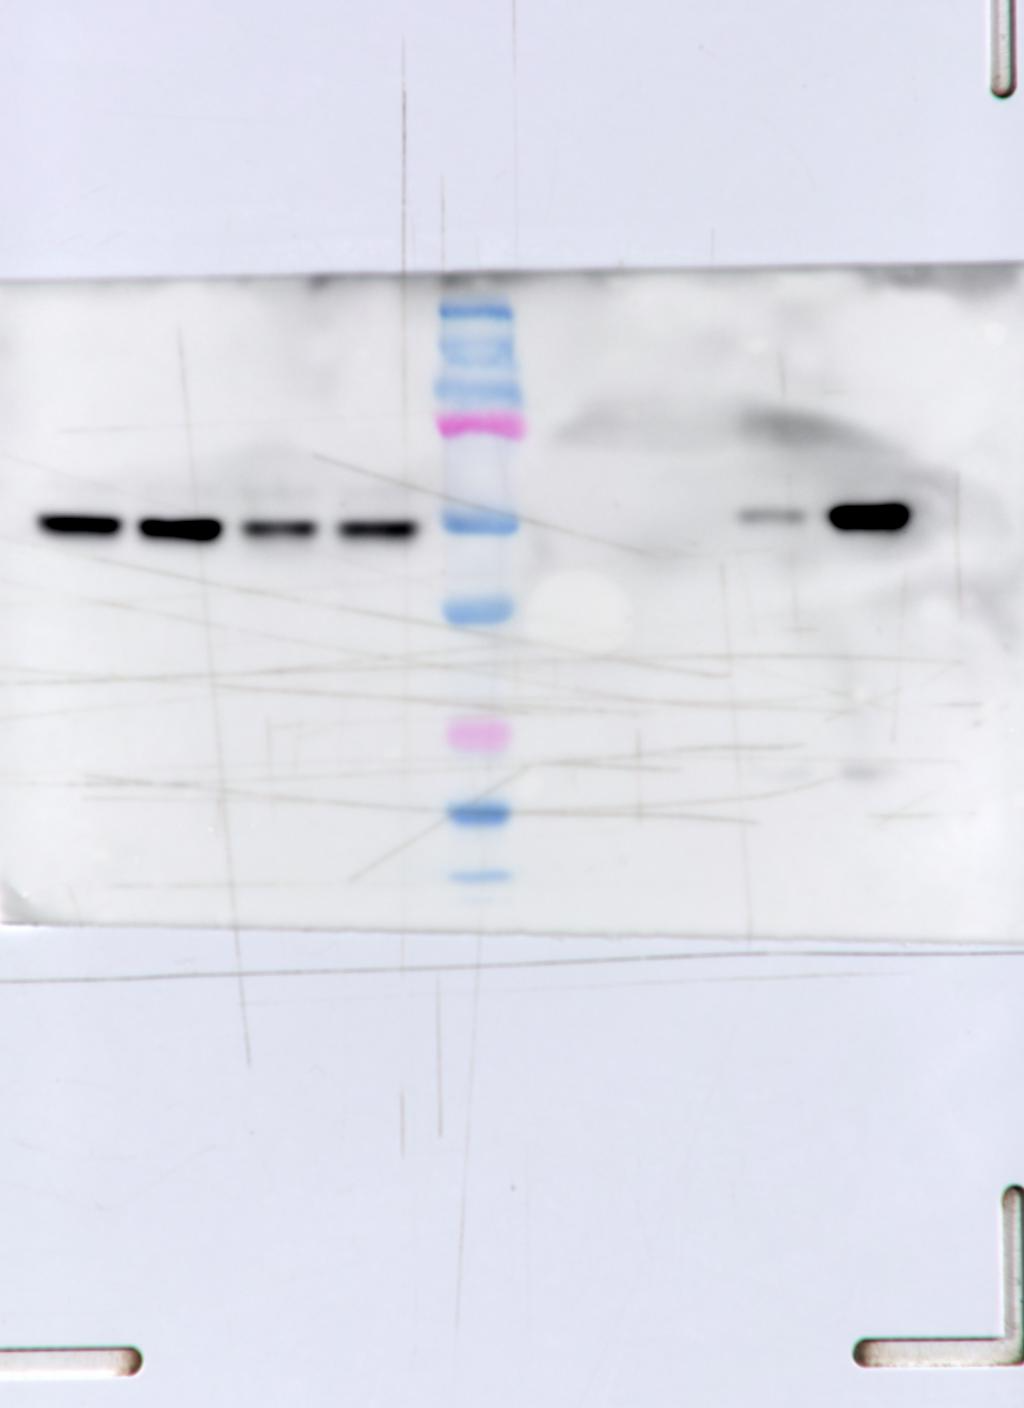


**p53**


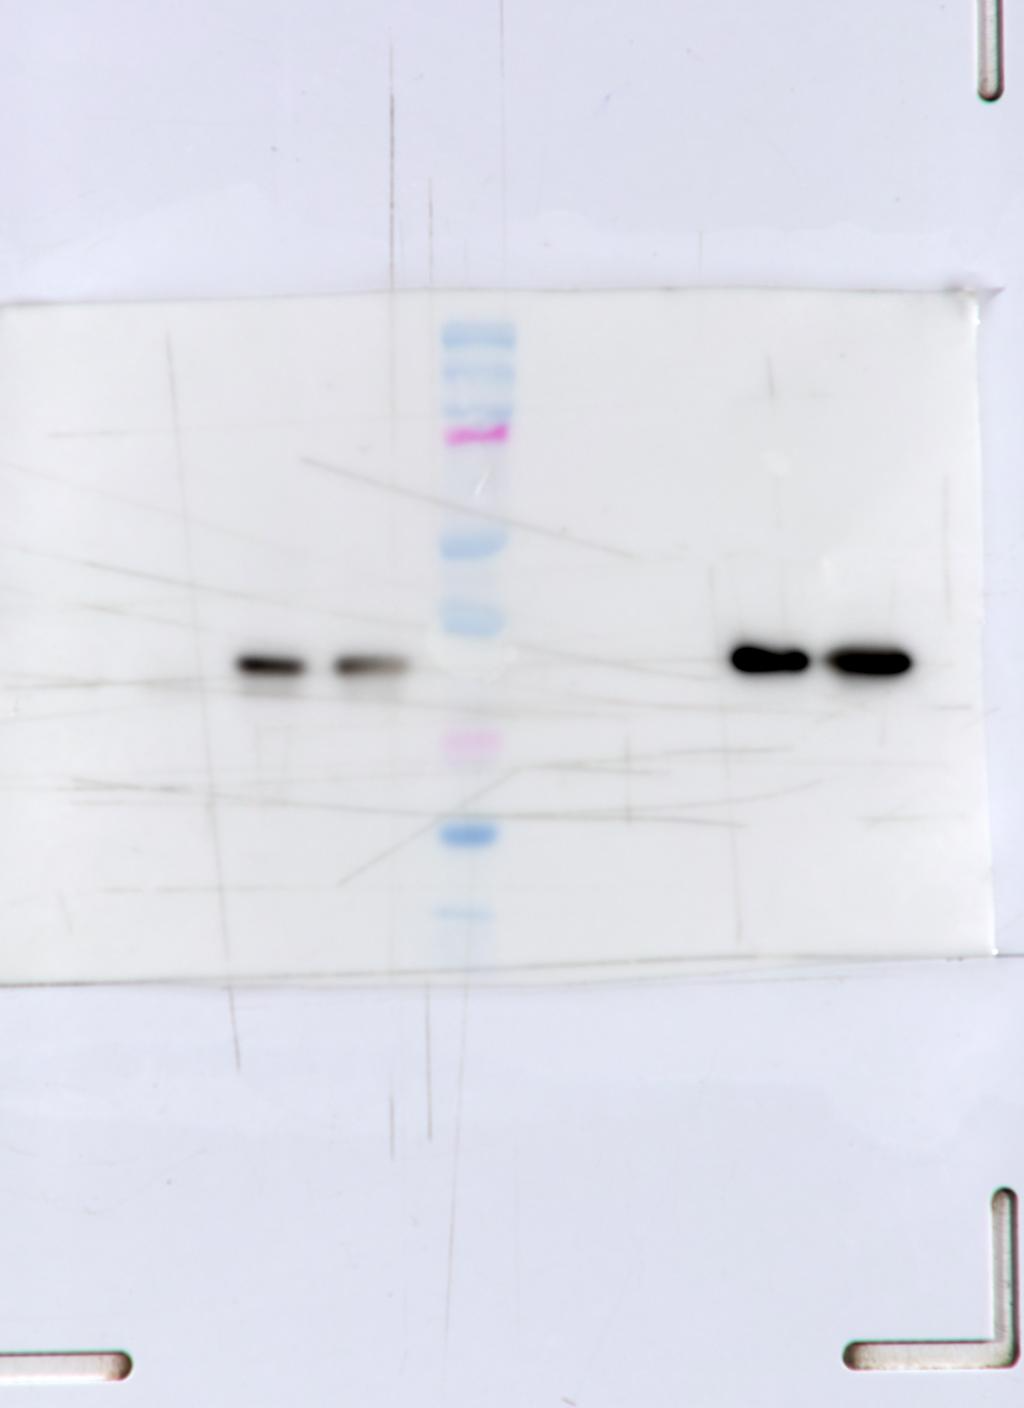


**14-3-3η**


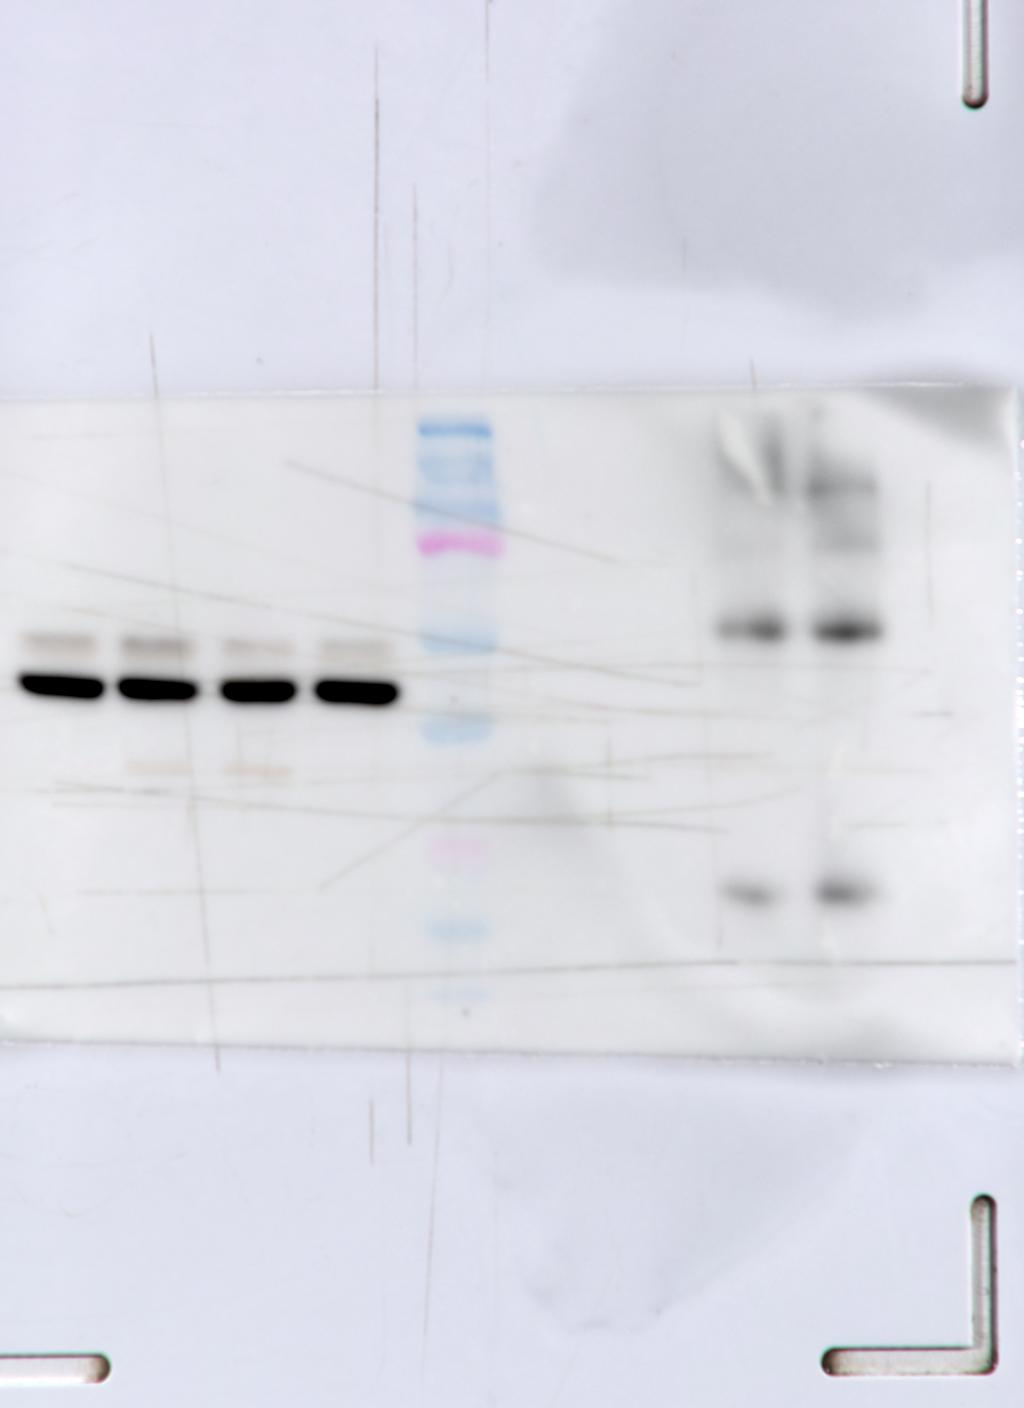


**Actin**
