# Supplementary material for: 14-3-3η Induces a Multidrug-Resistant Phenotype in Rheumatoid Arthritis via p53 Dysregulation: Insights from AIA Models
Source: Research Square preprint supplement (doi:10.21203/rs.3.rs-6528370/v1), 2025-05-07
Supplement: Supplementary file 2 [file 8617327e0a535e80244668c8.docx]

**Supplementary materials for**

**14-3-3η Induces a Multidrug-Resistant Phenotype in Rheumatoid Arthritis *via* p53 Dysregulation: Insights from AIA Models**

Li Jun Yang1*, David Wei Zhang1*, Yuan Qing Qu1, Yu Ping Wang1, Xiong Fei Xu1, Wei Dan Luo1,5, Betty Yuen Kwan Law1,2, Zhi-Hong Jiang1,2, Rui Hong Chen1, Cong Ling Qiu1, Xi Chen1, Lin Na Wang1, Jiu Jie Yang1, Yuan Li3,4**#**& Vincent Kam Wai Wong1,2**#**

Correspondence: kawwong@must.edu.mo (V.K.W. Wong); liyuan@njmu.edu.cn (Y. Li)

**This file includes:**

Supplementary Figures 1 to 4

Supplementary Tables 1 to 3

Western Blots original images

**Supplementary Figures**

**
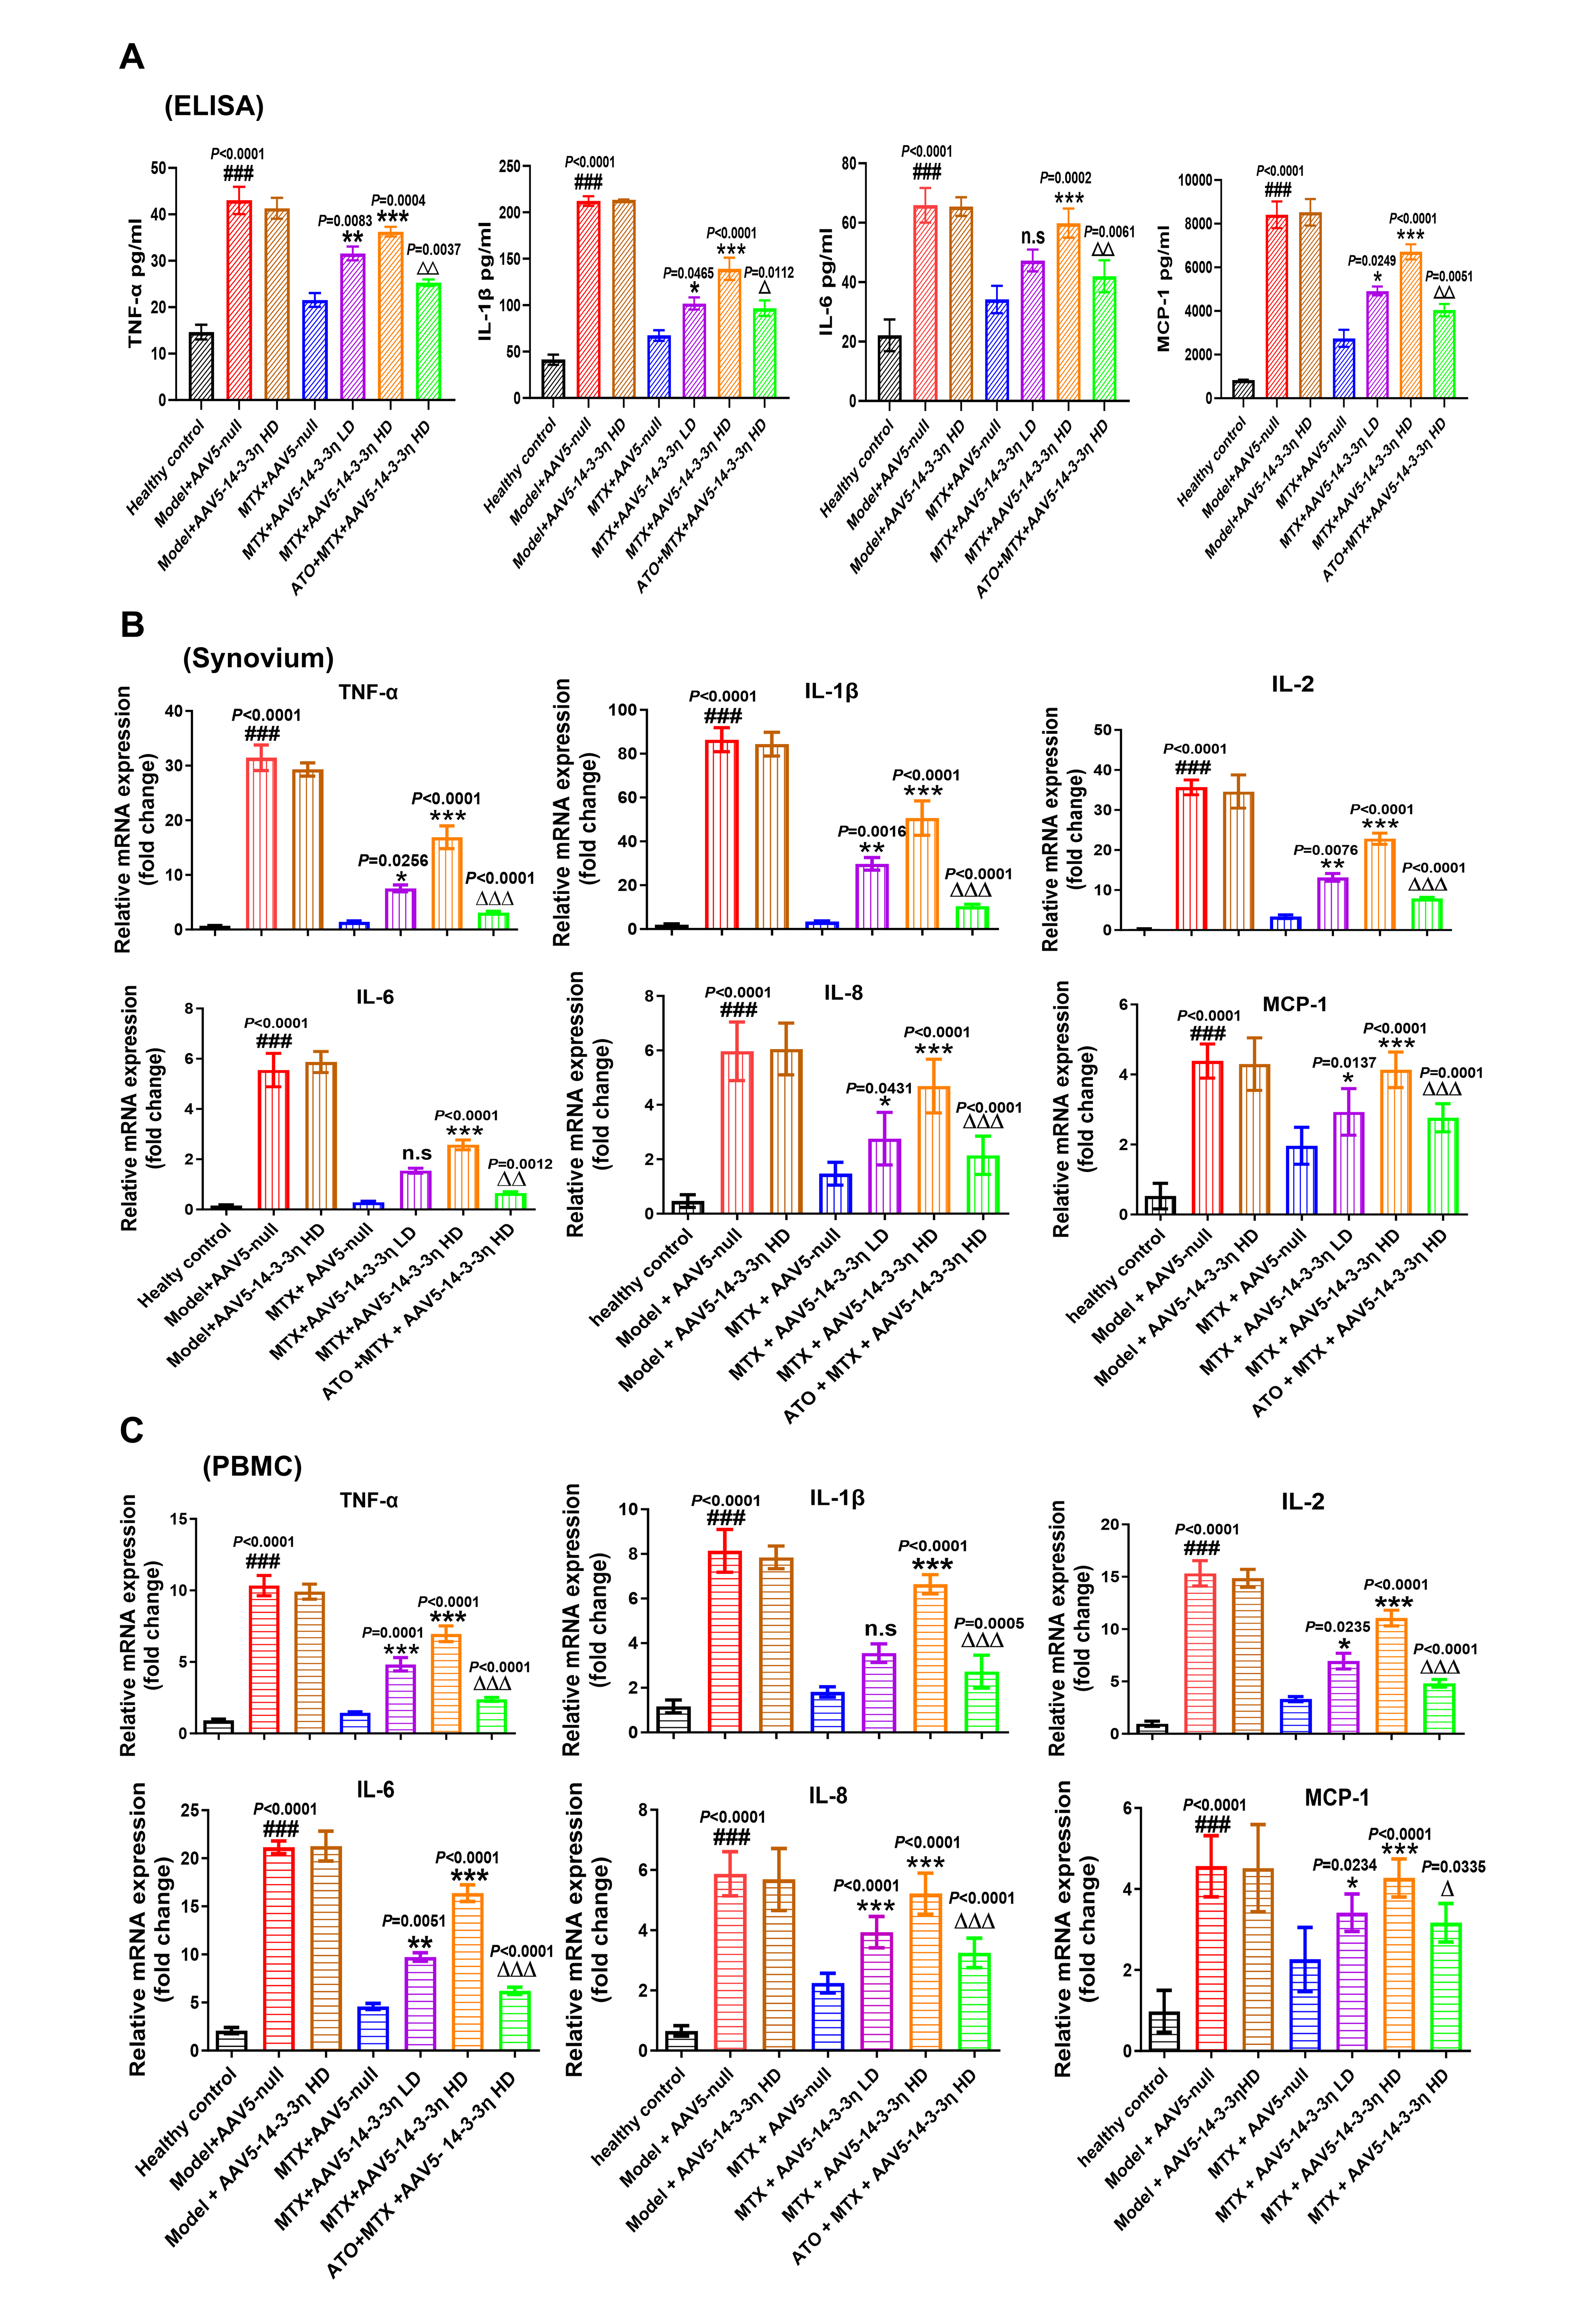
**

**Fig. S1.** Gene expression analysis of proinflammatory cytokines in the synovium or PBMCs of AIA rats overexpressing 14-3-3η. **(A)** The levels of the proinflammatory cytokines TNF-α, IL-1β, IL-6 and MCP-1 were measured by specific ELISA kits using blood serum from AIA rats in different groups. **(B)** The gene expression of proinflammatory cytokines, including TNF-α, IL-1β, IL-2, IL-6, IL-8 and MCP-1, in synovial tissues from the AIA rats was measured by qPCR. **(C)** The gene expression of proinflammatory cytokines, including TNF-α, IL-1β, IL-2, IL-6, IL-8 and MCP-1, in PBMCs from AIA rats was measured by qPCR. The data are expressed as the mean values ± SEMs from n=8 rats per group. One-way ANOVA, **P*<0.05, significantly different from the MTX + AAV5-null treated AIA group; △*P*<0.05, significantly different from the AAV5-14-3-3η HD + MTX-treated AIA group; # *P* < 0.05, significantly different from the healthy control group.


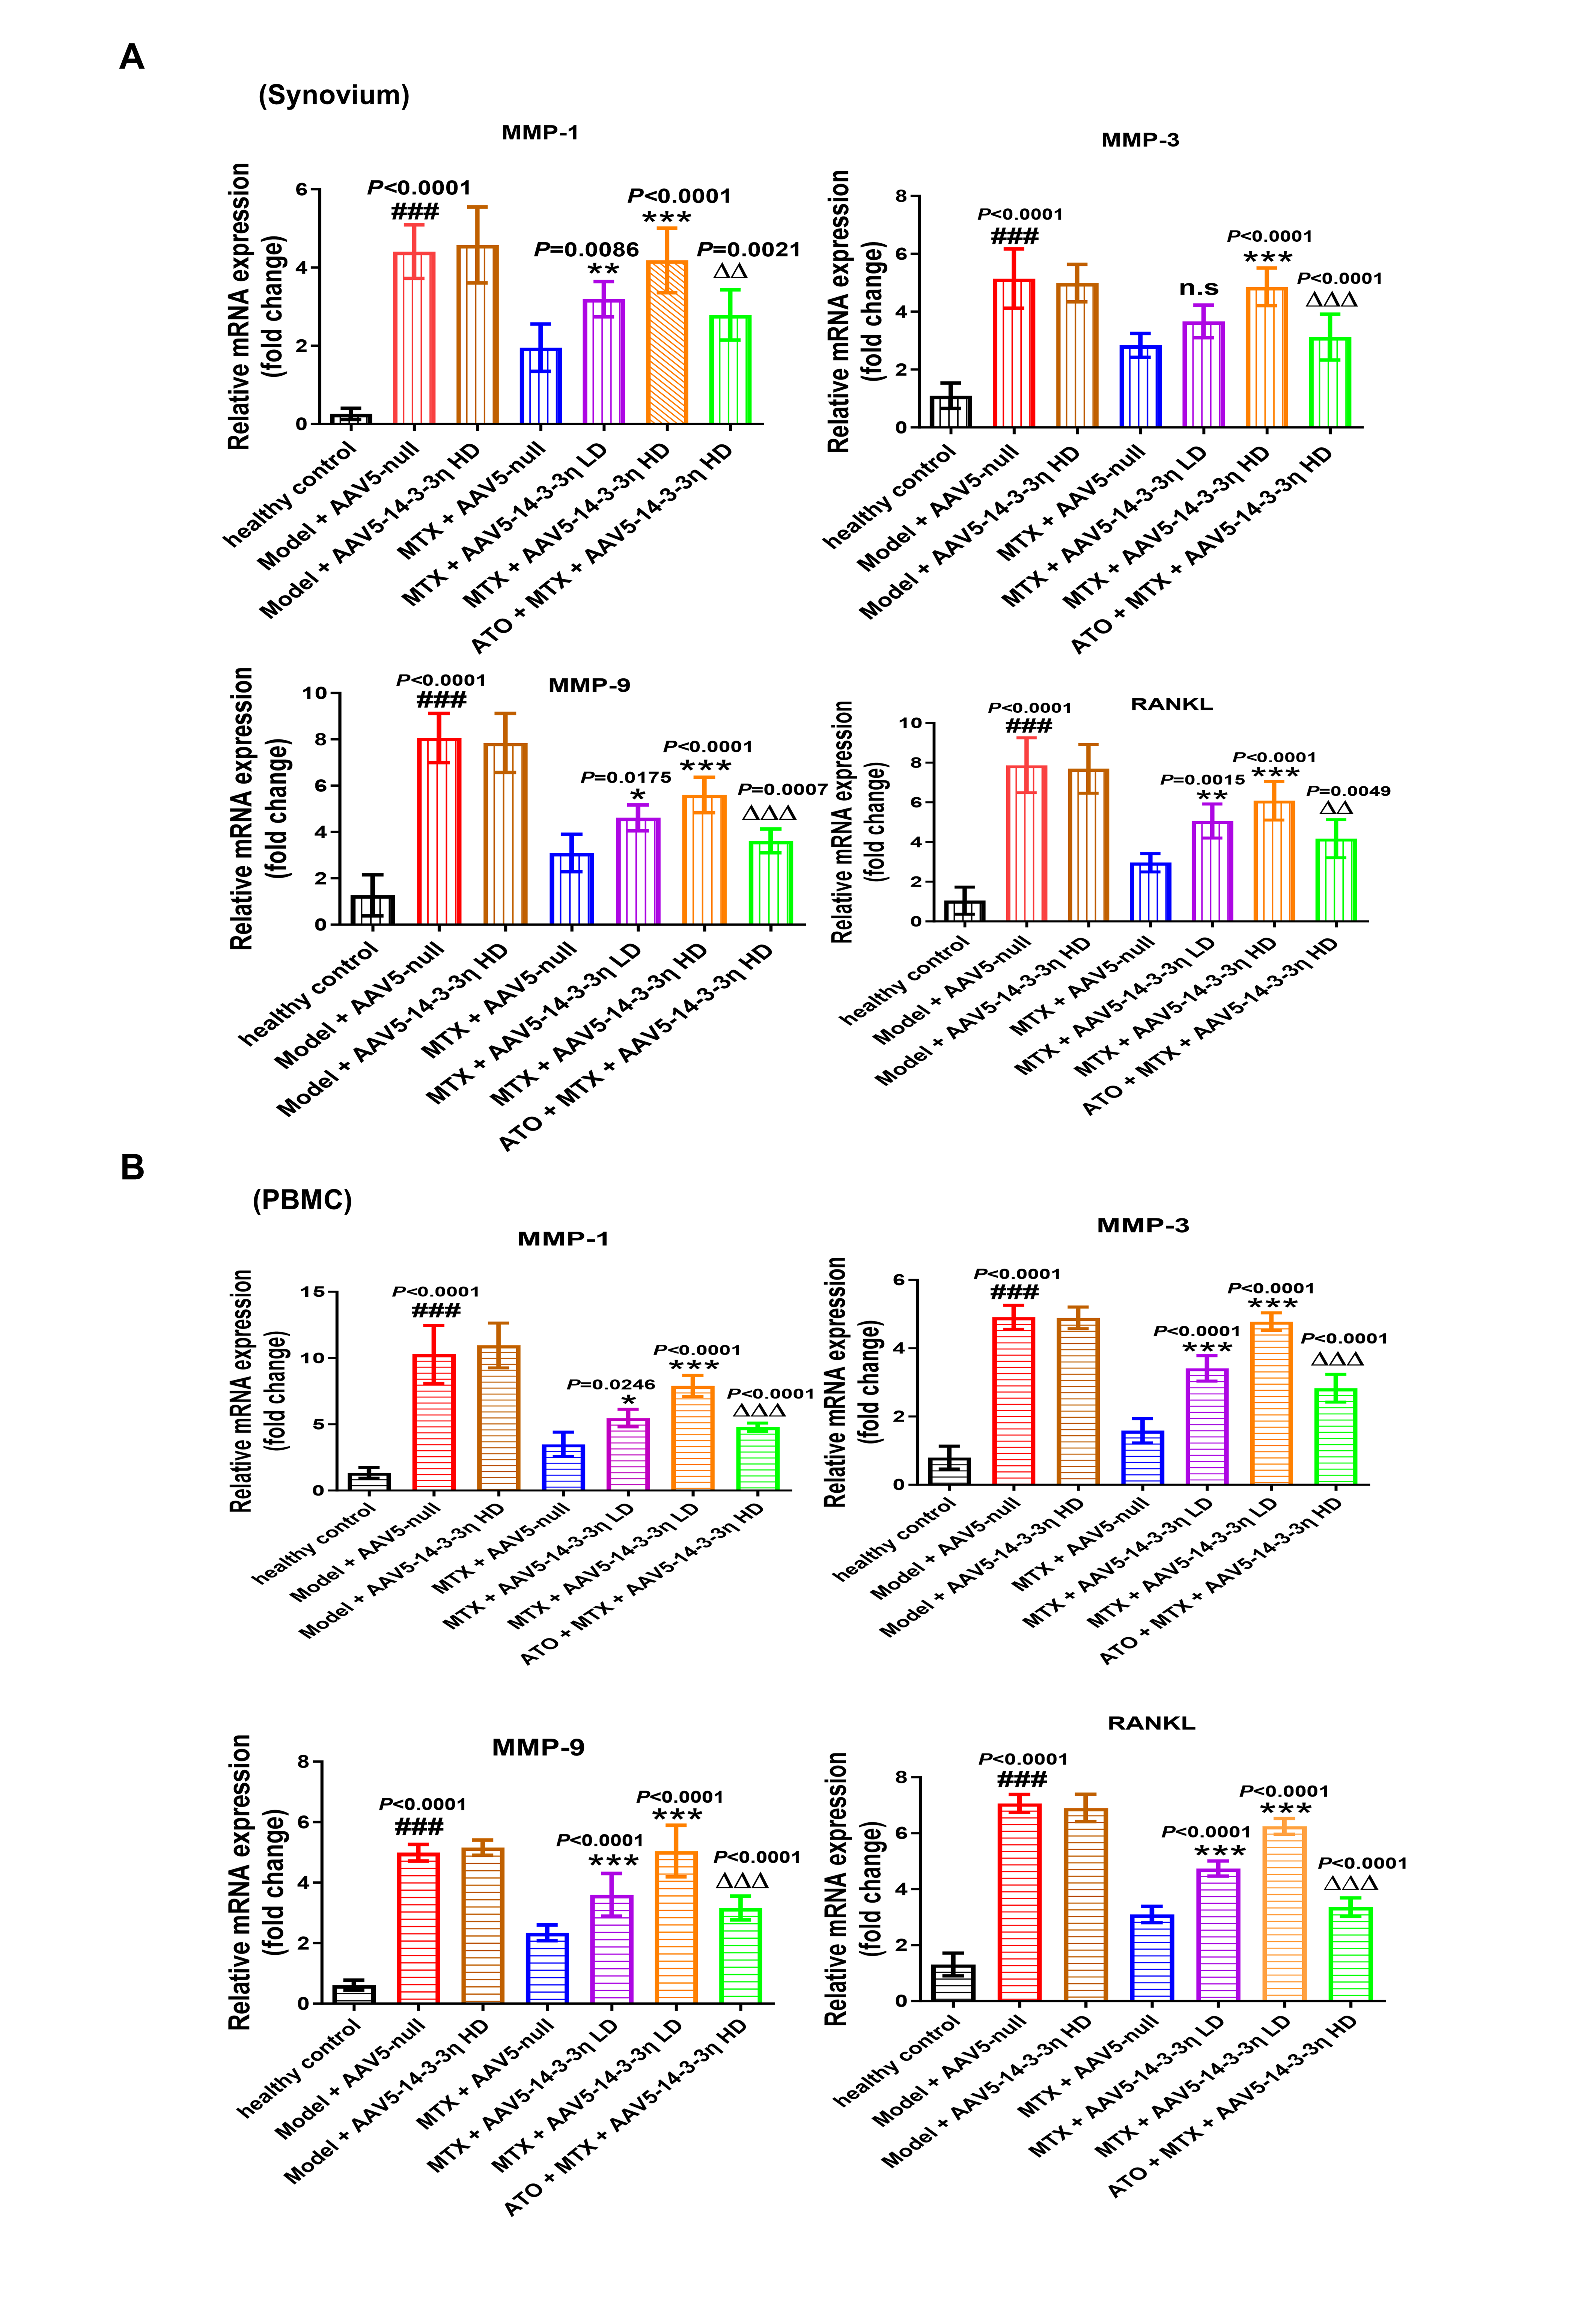


**Fig. S2.** Gene expression analysis of matrix metalloproteinases in the synovium or PBMCs of AIA-treated rats overexpressing 14-3-3η. **(A)** The levels of the metalloproteinases MMP1, MMP3, MMP9 and RANKL in synovial tissue from the AIA rats were measured via qPCR. **(B)** The levels of the metalloproteinases MMP1, MMP3, MMP9 and RANKL in PBMCs from AIA rats were measured by qPCR. The data are expressed as the mean values ± SEMs from n=8 rats per group. One-way ANOVA, **P*<0.05, significantly different from the MTX + AAV5-null treated AIA group; △*P*<0.05, significantly different from the AAV5-14-3-3η HD + MTX-treated AIA group; # *P* < 0.05, significantly different from the healthy control group.

**Fig. S3.** Gene expression analysis of proinflammatory cytokines and metalloproteinases in PBMCs harvested from AIA transgenic rats. **(A)** The levels of the proinflammatory cytokines TNF-α, IL-1β, IL-2, IL-6 and IL-17A and the metalloproteinases MMP1, MMP3 and MMP9 were measured by qPCR in PBMCs derived from AIA transgenic rats. **(B)** The mRNA expression of 14-3-3η in AIA 14-3-3η+/+ transgenic rats with inducible treatment of doxycycline.14-3-3η mRNA expression in PBMC of AIA 14-3-3η+/+ transgenic rats after doxycycline treatment. The data are expressed as the mean ± SEM (n=8 rats per group), statistical significance was calculated by t tests. * *P*<0.05 indicates a significant difference compared with the MTX + AAV5-null treated AIA group. △*P*<0.05, significantly different from the AIA 14-3-3η+/+ (MTX)-treated AIA group. #*P*<0.05, significantly different from the healthy control group.


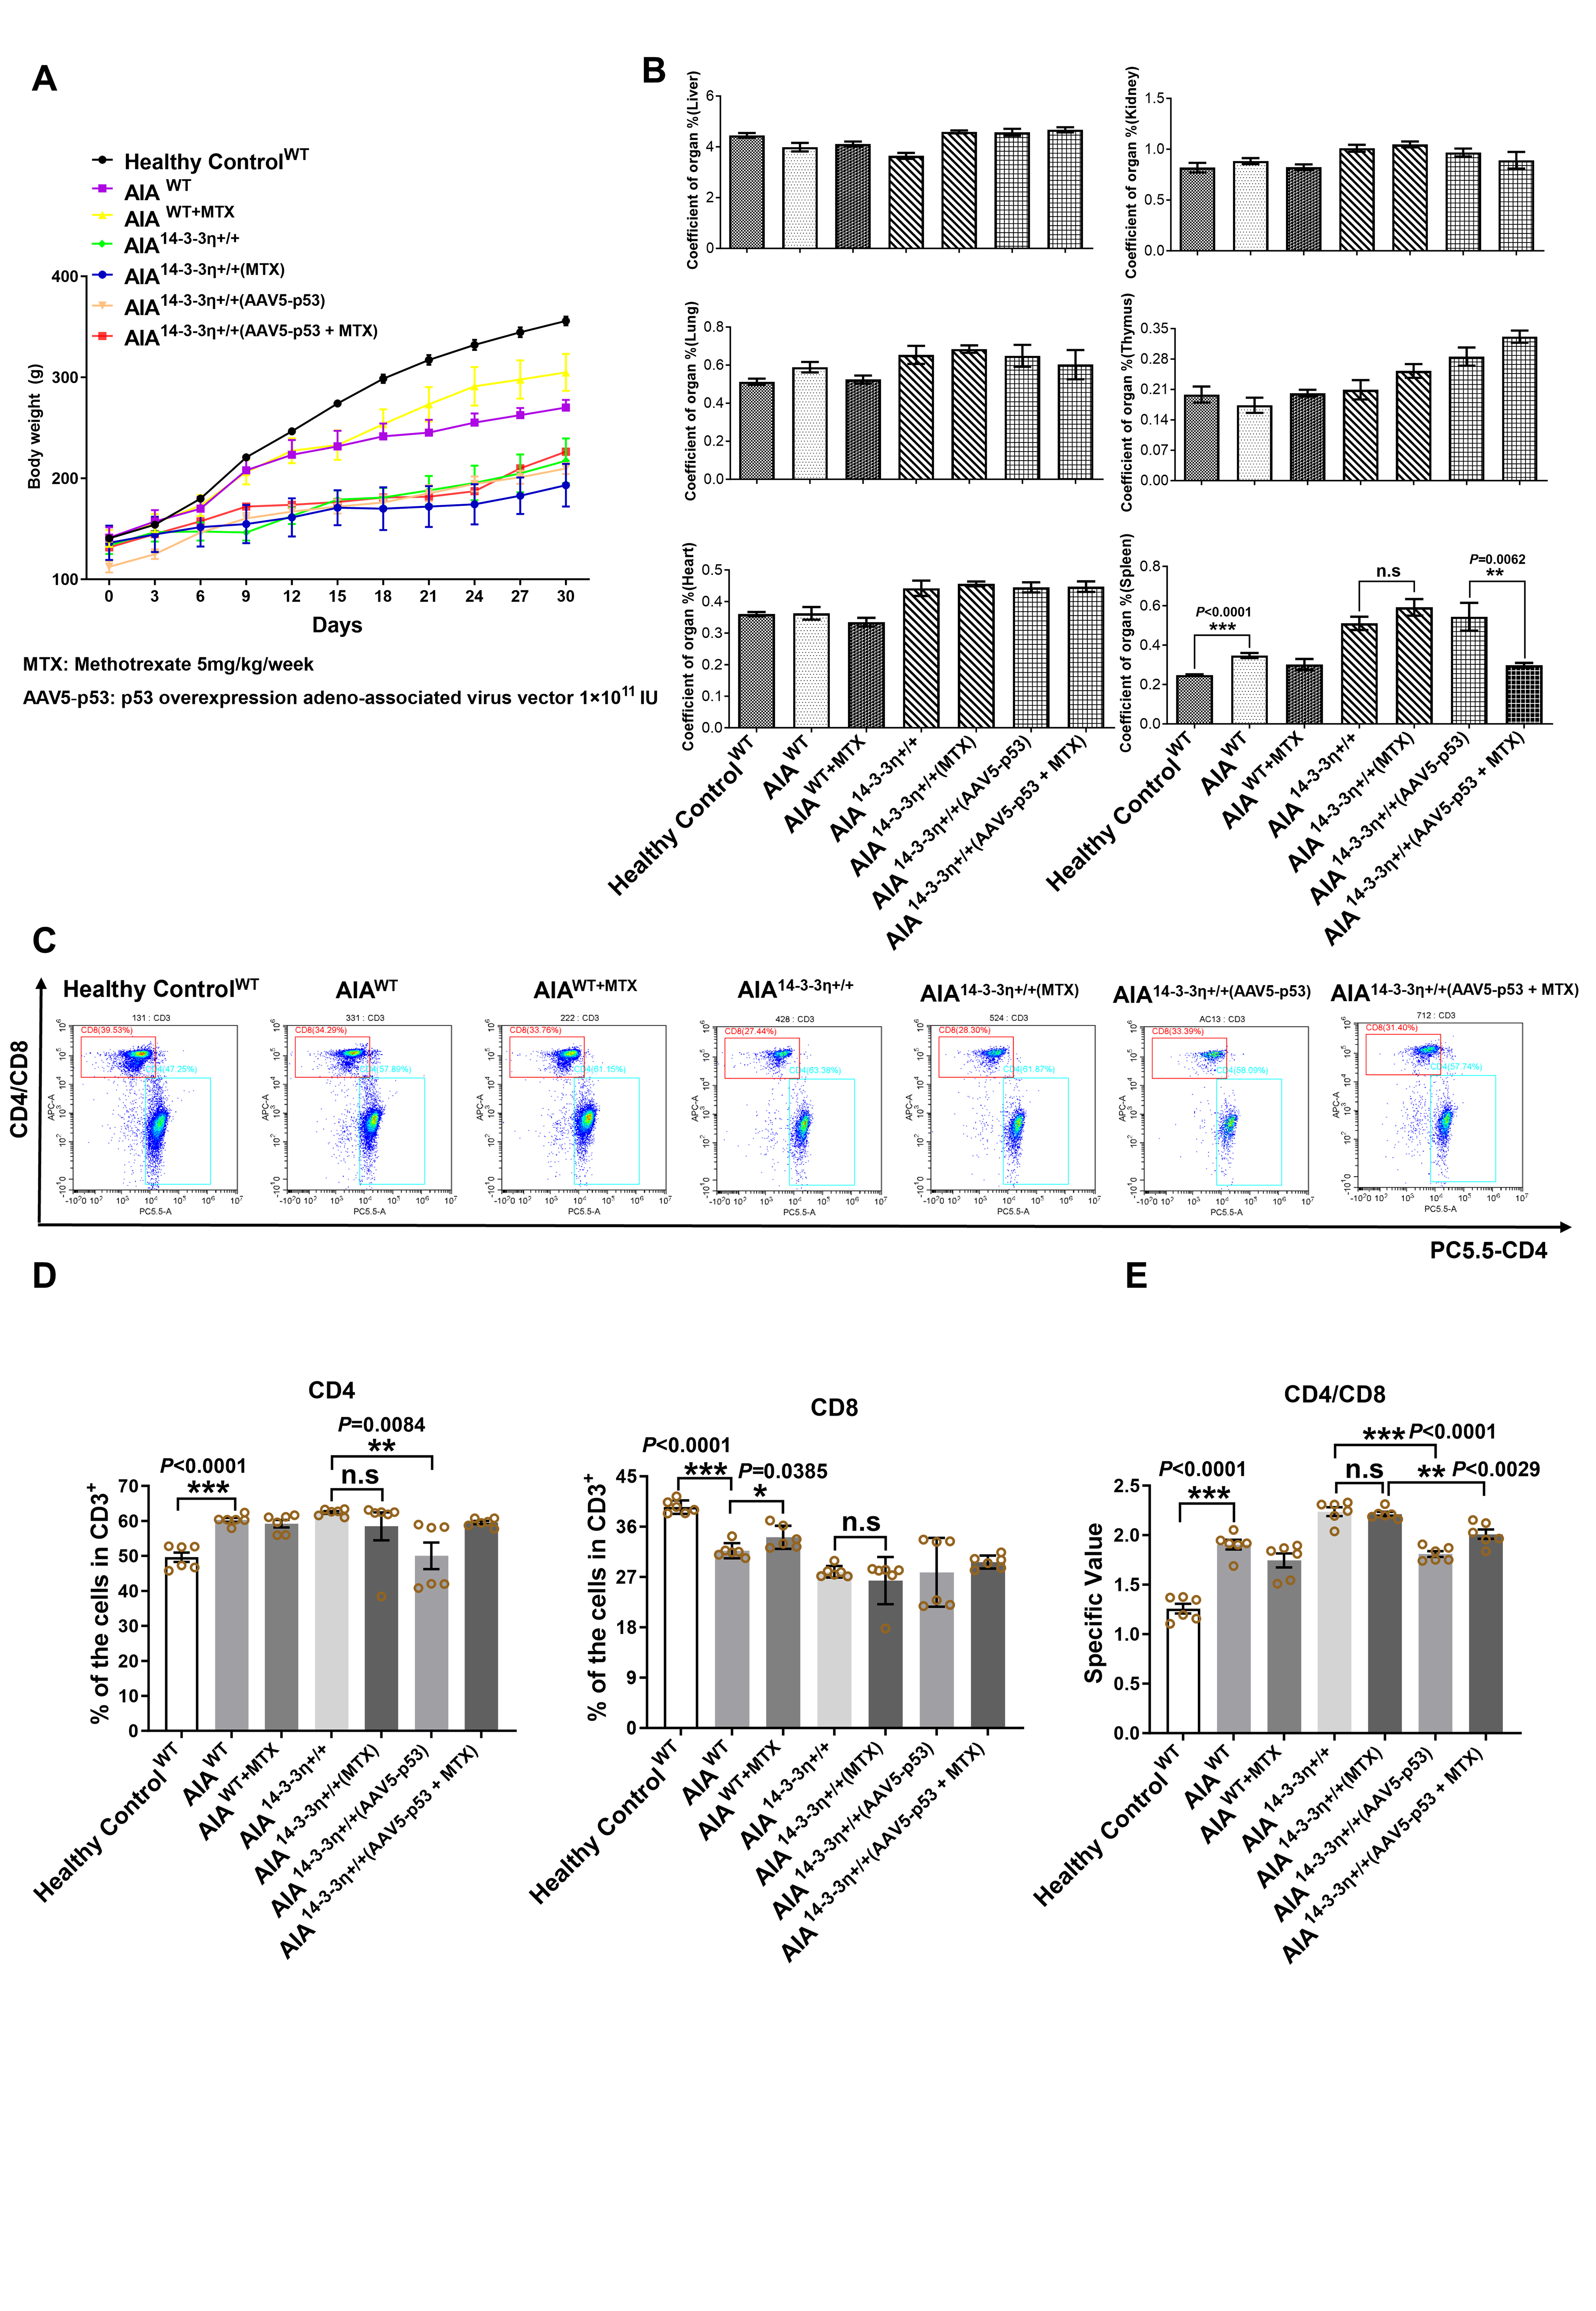


**Fig. S4.** Effects of body and organ weight in the AIA 14-3-3η+/+ transgenic rat. **(A)** Line graph depicting the changes in body weight of AIA 14-3-3η+/+ transgenic rats over the monitoring period. Rats were subjected to Dox (0.5 mg/ml, administered every other week for 5 consecutive days), MTX (2.5 mg/kg/week, administered via oral gavage), or AAV5-p53(intravenous injection of 1×1011 PFU). Weight was monitored continuously for 30 days, with measurements taken every three days, and rat organs were collected at the end of the experiment. All samples were biologically independent, and the data are presented as the mean ± SEM (all groups: n = 6). **(B)** Bar graphs illustrating the organ coefficients of the rats. Organ coefficient = Organ weight/Body weight. The results are presented as a percentage of body weight. **(C)** Intravenous injections of AAV5-p53 reduced the percentage of CD4+ cells among lymphocytes, affecting the CD4+/CD8+ T-cell ratio. Typical flow cytometry images showing the purification of CD4+ and CD8+ cells gated on CD3+ T lymphocytes. **(D)** Quantitative bar graphs showing the percentages of CD4+ T and CD8+ T cells among CD3+ T cells. **(E)** Bar graph showing the ratio of CD4+/CD8+ cell percentages among CD3+ T cells. All samples were biologically independent, and statistical significance was calculated using t tests. **P* < 0.05, ***P* < 0.01, ****P* < 0.001, n.s: no significant difference. The data are presented as the means ± SEMs (all groups: n = 6).

**Supplementary Tables**

Supplementary Table 1. Primer sequences used for real-time PCR

| **Gene Name** | **Forward** | **Reverse** |
| --- | --- | --- |
| **Human-14-3-3η** | 5’-ACAAGCCTTCGATGATGCCA-3’ | 5’-TCCAGAGGGTGAGGTTGTCT-3’ |
| **Human- p53** | 5’- AGCCGGTGAAGGTTGTGTAC -3’ | 5’- TGACGAAGCAGATGTGGAAG-3’ |
| **Human-β-actin** | 5’-AGCGAGCATCCCCCAAAGTT-3’ | 5’-GGGCACGAAGGCTCATCATT-3’ |
| **Rat-TNF-α** | 5’-CAGAGGGAAGAGTTCCCCAG-3’ | 5’-CCTTGGTCTGGTAGGAGACG-3’ |
| **Rat-14-3-3η** | 5’-TGATCTCTTGGCTCTGCTCG-3’ | 5’-AGCGGTAGTAATCGCCCTTC-3’ |
| **Rat- p53** | 5’-GTTCCGAGAGCTGAATGAGG-3’ | 5’-TTTTATGGCGGGACGTAGAC-3’ |
| **Rat-IL-1β** | 5’-GCACAGTTCCCCAACTGGTA-3’ | 5’-AAGACACGGGTTCCATGGTG-3’ |
| **Rat-IL-6** | 5’-CCACCCACAACAGACCAGTA-3’ | 5’-GGAACTCCAGAAGACCAGAGC-3’ |
| **Rat-IL-2** | 5’-CTGCAGCGTGTGTTGGATTT-3’ | 5’-GGCTCATCATCGAATTGGCAC-3’ |
| **Rat-IL-6** | 5’-CCACCCACAACAGACCAGTA- 3’ | 5’GGAACTCCAGAAGACCAGAGC-3’ |
| **Rat-IL-8** | 5’-CTGCGCCAACACAGAAATTA-3’ | 5’-ATTGCATCTGGCAACCCTAC-3’ |
| **Rat-IL-17A** | 5’-GGGAAGTTGGACCACCACCT-3’ | 5’-TTCTCCACCCGGAAAGTGAA-3’ |
| **Rat-MCP-1** | 5’-CAGTTAATGCCCCACTCACCT-3’ | 5’-ACAGCTTCTTTGGGACACCTG-3’ |
| **Rat-MMP-1** | 5’-TTTGATGGACCTCAATAT-3’ | 5’-CATTAGTGCTCCTACA-3’ |
| **Rat-MMP-3** | 5’-AAAGACAGGCACTTTTGGCG-3’ | 5’-ATCCACCTTTGTGCCAATGC-3’ |
| **Rat-MMP-9** | 5’-AGTTTGGTGTCGCGGAGCAC-3’ | 5’-TACATGAGCGCTTCCGGCAC-3’ |
| **Rat-RANKL** | 5’-CATCCCATCGGGTTCCCATA-3’ | 5’-AGCA AATGTTGGCGTACAGG-3’ |
| **Rat-β-actin** | 5’-CCCATCTATGAGGGTTACGC-3’ | 5’-TTTAIATGTCACGCACGATTTC-3’ |

Supplementary Table 2. Gene table of RT2 ProfilerTM PCR Array for human cancer drug-resistance

| **Gene symbol** | **Description** |
| --- | --- |
| ABCB1 | ATP-binding cassette, sub-family B (MDR/TAP), member 1 |
| ABCC1 | ATP-binding cassette, sub-family C (CFTR/MRP), member 1 |
| ABCC2 | ATP-binding cassette, sub-family C (CFTR/MRP), member 2 |
| ABCC3 | ATP-binding cassette, sub-family C (CFTR/MRP), member 3 |
| ABCC5 | ATP-binding cassette, sub-family C (CFTR/MRP), member 5 |
| ABCG2 | ATP-binding cassette, sub-family G (WHITE), member 2 |
| AHR | Aryl hydrocarbon receptor |
| AP1S1 | Adaptor-related protein complex 1, sigma 1 subunit |
| APC | Adenomatous polyposis coli |
| AR | Androgen receptor |
| ARNT | Aryl hydrocarbon receptor nuclear translocator |
| ATM | Ataxia telangiectasia mutated |
| BAX | BCL2-associated X protein |
| BCL2 | B-cell CLL/lymphoma 2 |
| BCL2L1 | BCL2-like 1 |
| BLMH | Bleomycin hydrolase |
| BRCA1 | Breast cancer 1, early onset |
| BRCA2 | Breast cancer 2, early onset |
| CCND1 | Cyclin D1 |
| CCNE1 | Cyclin E1 |
| CDK2 | Cyclin-dependent kinase 2 |
| CDK4 | Cyclin-dependent kinase 4 |
| CDKN1A | Cyclin-dependent kinase inhibitor 1A (p21, Cip1) |
| CDKN1B | Cyclin-dependent kinase inhibitor 1B (p27, Kip1) |
| CDKN2A | Cyclin-dependent kinase inhibitor 2A (melanoma, p16, inhibits CDK4) |
| CDKN2D | Cyclin-dependent kinase inhibitor 2D (p19, inhibits CDK4) |
| CLPTM1L | CLPTM1-like |
| CYP1A1 | Cytochrome P450, family 1, subfamily A, polypeptide 1 |
| CYP1A2 | Cytochrome P450, family 1, subfamily A, polypeptide 2 |
| CYP2B6 | Cytochrome P450, family 2, subfamily B, polypeptide 6 |
| CYP2C19 | Cytochrome P450, family 2, subfamily C, polypeptide 19 |
| CYP2C8 | Cytochrome P450, family 2, subfamily C, polypeptide 8 |
| CYP2C9 | Cytochrome P450, family 2, subfamily C, polypeptide 9 |
| CYP2D6 | Cytochrome P450, family 2, subfamily D, polypeptide 6 |
| CYP2E1 | Cytochrome P450, family 2, subfamily E, polypeptide 1 |
| CYP3A4 | Cytochrome P450, family 3, subfamily A, polypeptide 4 |
| CYP3A5 | Cytochrome P450, family 3, subfamily A, polypeptide 5 |
| DHFR | Dihydrofolate reductase |
| EGFR | Epidermal growth factor receptor |
| ELK1 | ELK1, member of ETS oncogene family |
| EPHX1 | Epoxide hydrolase 1, microsomal (xenobiotic) |
| ERBB2 | V-erb-b2 erythroblastic leukemia viral oncogene homolog 2, neuro/glioblastoma derived oncogene homolog (avian) |
| ERBB3 | V-erb-b2 erythroblastic leukemia viral oncogene homolog 3 (avian) |
| ERBB4 | V-erb-a erythroblastic leukemia viral oncogene homolog 4 (avian) |
| ERCC3 | Excision repair cross-complementing rodent repair deficiency, complementation group 3 (xeroderma pigmentosum group B complementing) |
| ESR1 | Estrogen receptor 1 |
| ESR2 | Estrogen receptor 2 (ER beta) |
| FGF2 | Fibroblast growth factor 2 (basic) |
| FOS | FBJ murine osteosarcoma viral oncogene homolog |
| GSK3A | Glycogen synthase kinase 3 alpha |
| GSTP1 | Glutathione S-transferase pi 1 |
| HIF1A | Hypoxia inducible factor 1, alpha subunit (basic helix-loop-helix transcription factor) |
| IGF1R | Insulin-like growth factor 1 receptor |
| IGF2R | Insulin-like growth factor 2 receptor |
| MET | Met proto-oncogene (hepatocyte growth factor receptor) |
| MSH2 | MutS homolog 2, colon cancer, nonpolyposis type 1 (E. coli) |
| MVP | Major vault protein |
| MYC | V-myc myelocytomatosis viral oncogene homolog (avian) |
| NAT2 | N-acetyltransferase 2 (arylamine N-acetyltransferase) |
| NFKB1 | Nuclear factor of kappa light polypeptide gene enhancer in B-cells 1 |
| NFKB2 | Nuclear factor of kappa light polypeptide gene enhancer in B-cells 2 (p49/p100) |
| NFKBIB | Nuclear factor of kappa light polypeptide gene enhancer in B-cells inhibitor, beta |
| NFKBIE | Nuclear factor of kappa light polypeptide gene enhancer in B-cells inhibitor, epsilon |
| PPARA | Peroxisome proliferator-activated receptor alpha |
| PPARD | Peroxisome proliferator-activated receptor delta |
| PPARG | Peroxisome proliferator-activated receptor gamma |
| RARA | Retinoic acid receptor, alpha |
| RARB | Retinoic acid receptor, beta |
| RARG | Retinoic acid receptor, gamma |
| RB1 | Retinoblastoma 1 |
| RELB | V-rel reticuloendotheliosis viral oncogene homolog B |
| RXRA | Retinoid X receptor, alpha |
| RXRB | Retinoid X receptor, beta |
| SOD1 | Superoxide dismutase 1, soluble |
| SULT1E1 | Sulfotransferase family 1E, estrogen-preferring, member 1 |
| TNFRSF11A | Tumor necrosis factor receptor superfamily, member 11a, NFKB activator |
| TOP1 | Topoisomerase (DNA) I |
| TOP2A | Topoisomerase (DNA) II alpha 170kDa |
| TOP2B | Topoisomerase (DNA) II beta 180kDa |
| TP53 | Tumor protein p53 |
| TPMT | Thiopurine S-methyltransferase |
| UGCG | UDP-glucose ceramide glucosyltransferase |
| XPA | Xeroderma pigmentosum, complementation group A |
| XPC | Xeroderma pigmentosum, complementation group C |
| ACTB | Actin, beta |
| B2M | Beta-2-microglobulin |
| GAPDH | Glyceraldehyde-3-phosphate dehydrogenase |
| HPRT1 | Hypoxanthine phosphoribosyltransferase 1 |
| RPLP0 | Ribosomal protein, large, P0 |
| HGDC | Human Genomic DNA Contamination |
| RTC | Reverse Transcription Control |
| RTC | Reverse Transcription Control |
| RTC | Reverse Transcription Control |
| PRC | Positive PCR Control |
| PPC | Positive PCR Control |
| PPC | Positive PCR Control |

Supplementary Table 3. RA, OA and healthy donors’ baseline data sheet.

|  | **RA (n=51)** | **OA (n=7)** | **Healthy (n=29)** |
| --- | --- | --- | --- |
| **Age (year (mean (range)))** | 53(30~73) | 57(30~72) | 45(24~74) |
| **Sex (N(F/M))** | 24/14 | 14/3 | 22/7 |
| **Disease duration (year(mean(range))** | 5(1~20) | 8(1~23) | NA |
| **CRP (mg/L(mean(range)))** | 20.2(1.4~93) | 14.5(3.13~39.5) | NA |
| **ESR (mm/h(mean(range)))** | 49.5(8~120) | 22.3(8~47) | NA |
| **RF (>20 IU/mL)** | 31/38 | NA | NA |

CRP, C-reactive protein; ESR, Erythrocyte sedimentation rate; RF, Rheumatoid factors; NA, not assessed.

**Western Blots original images**

**Figure 4**

**C**


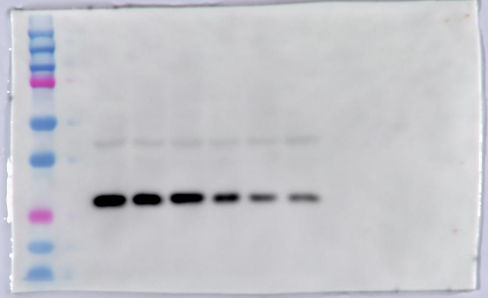


**14-3-3η**


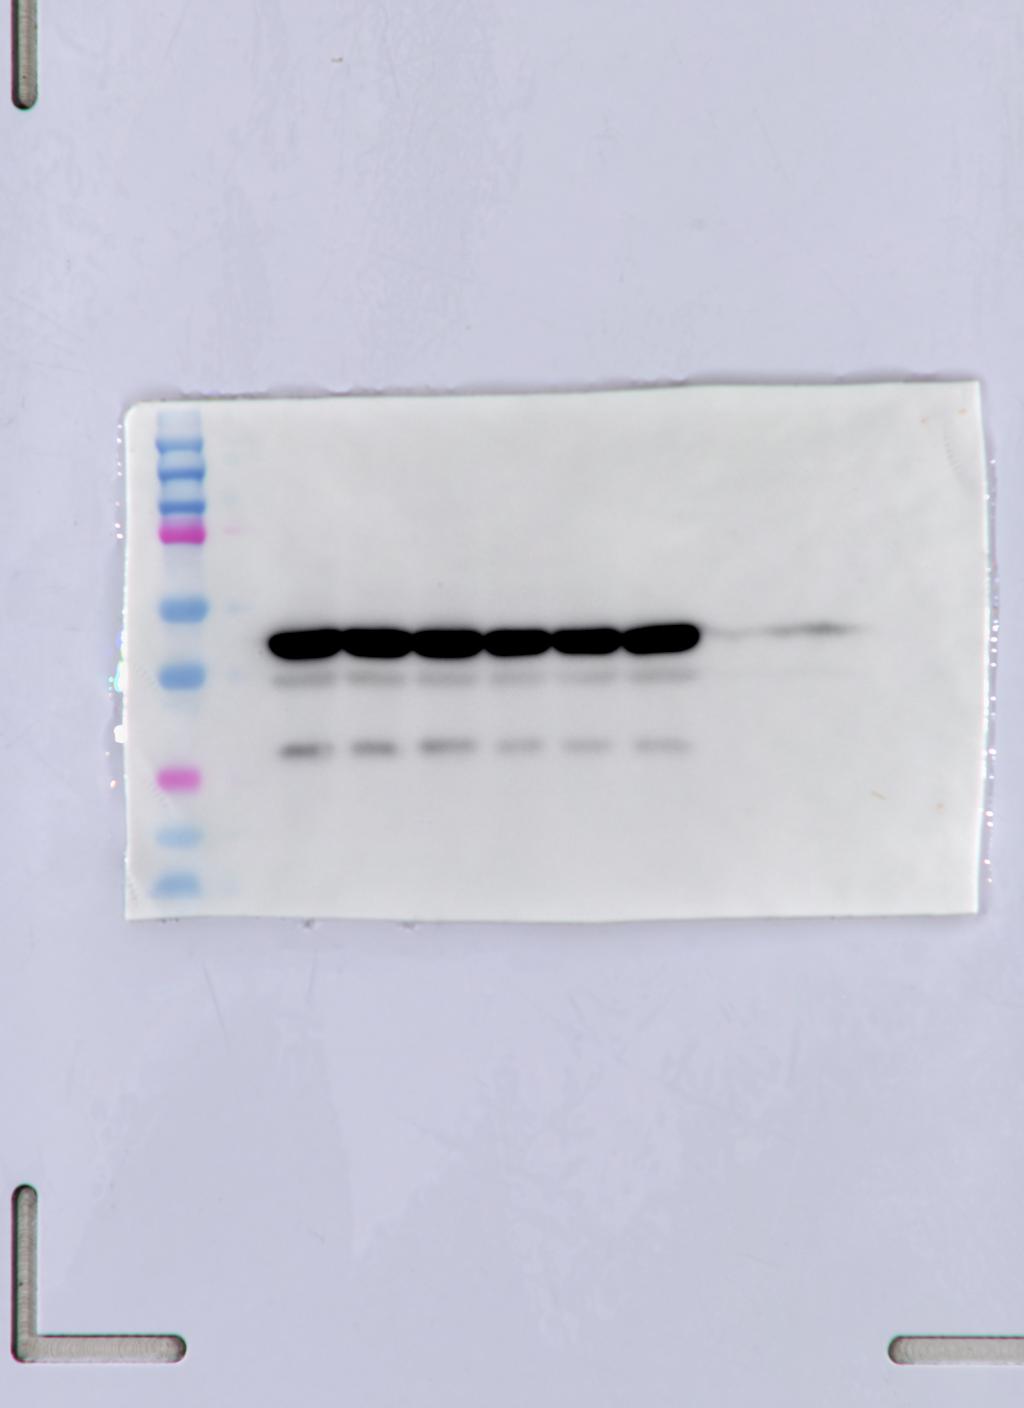


**β-actin**

**E**

**
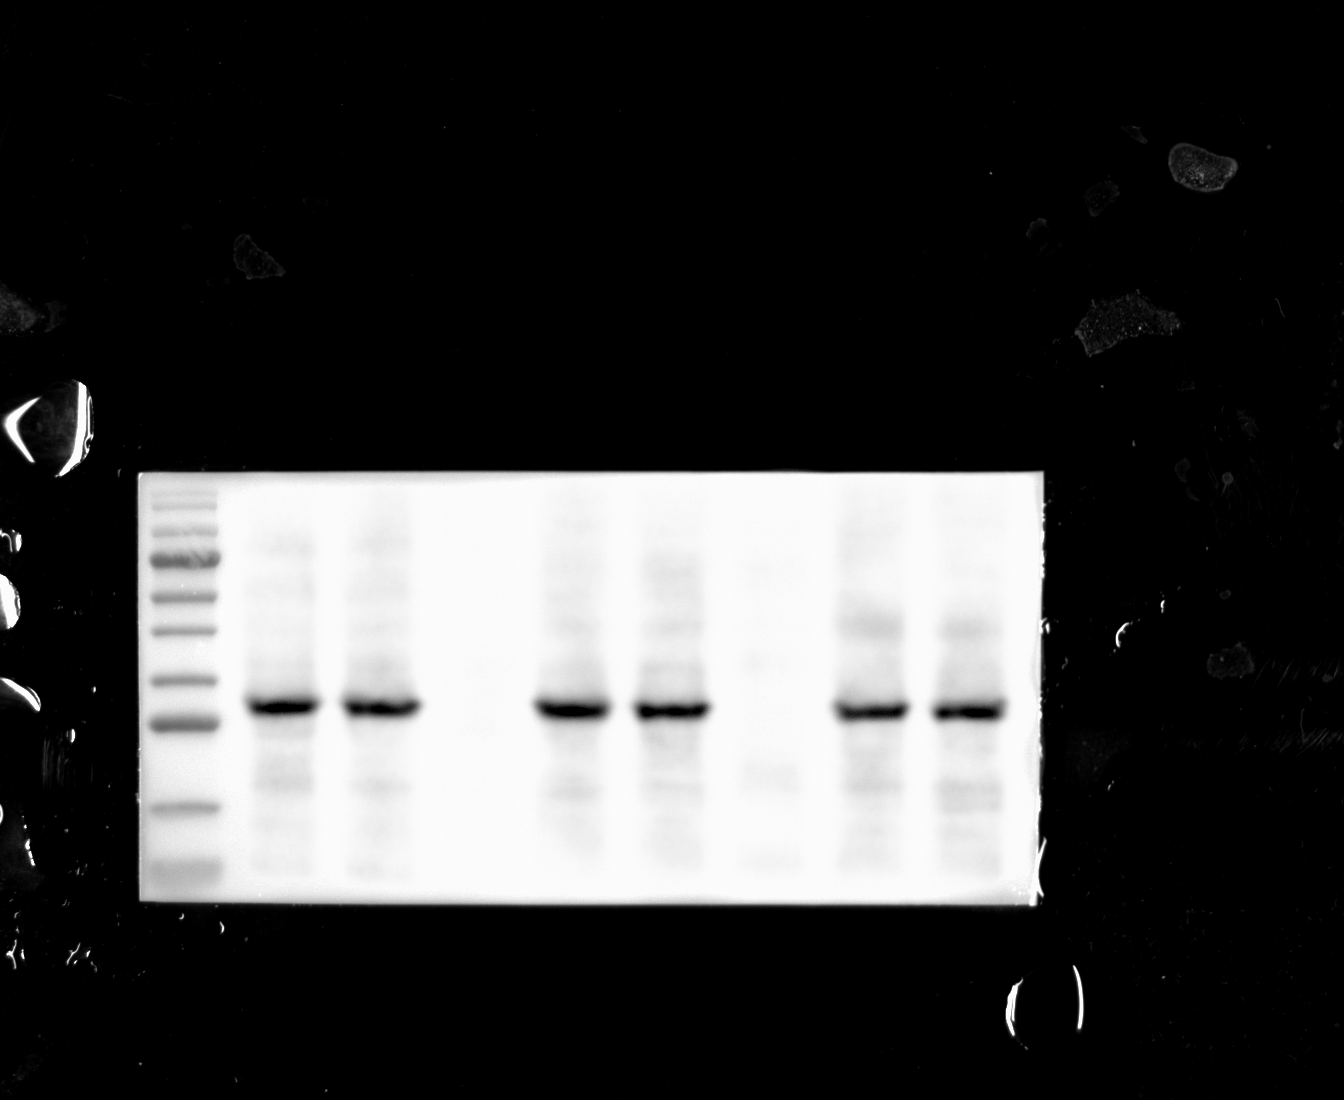

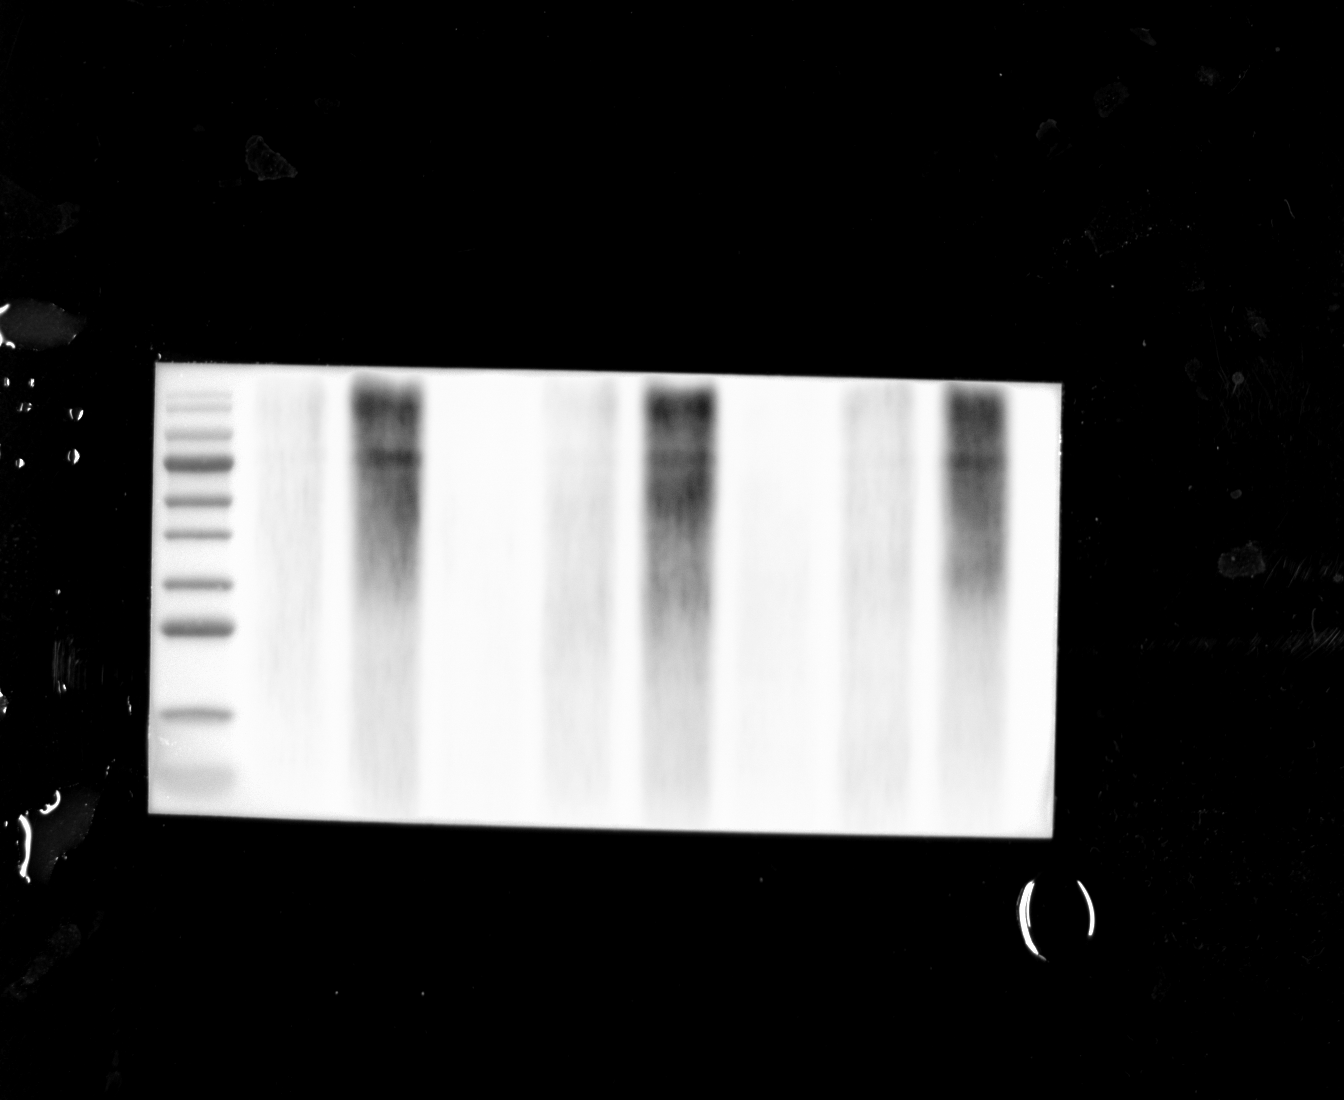
**

**14-3-3η**

**Ubiquitin**

**
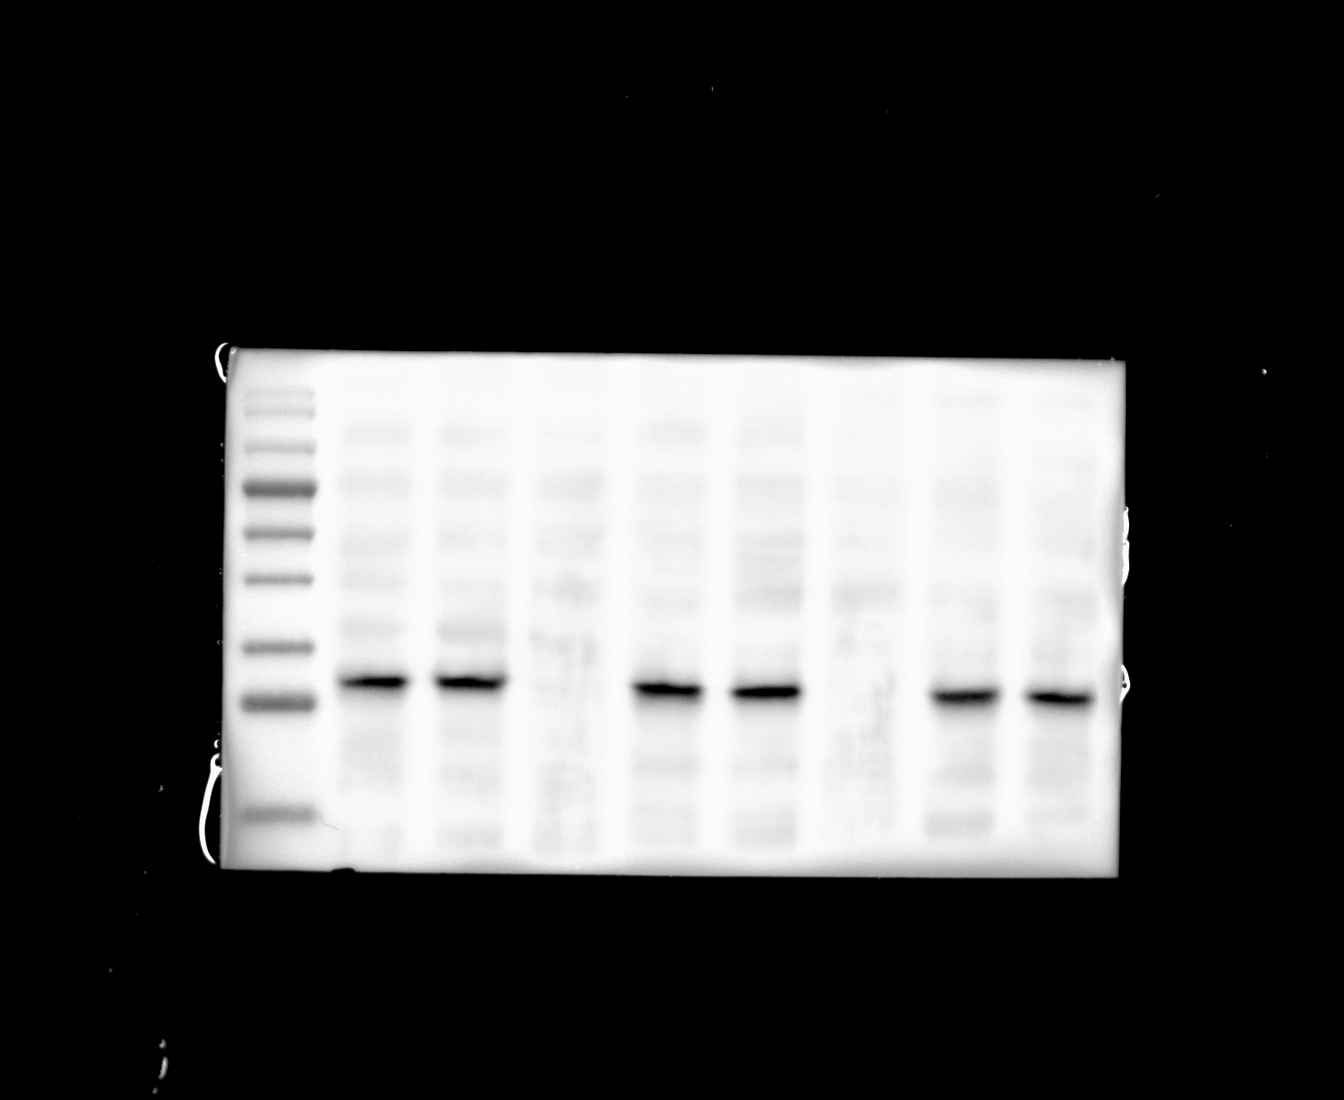
**

**
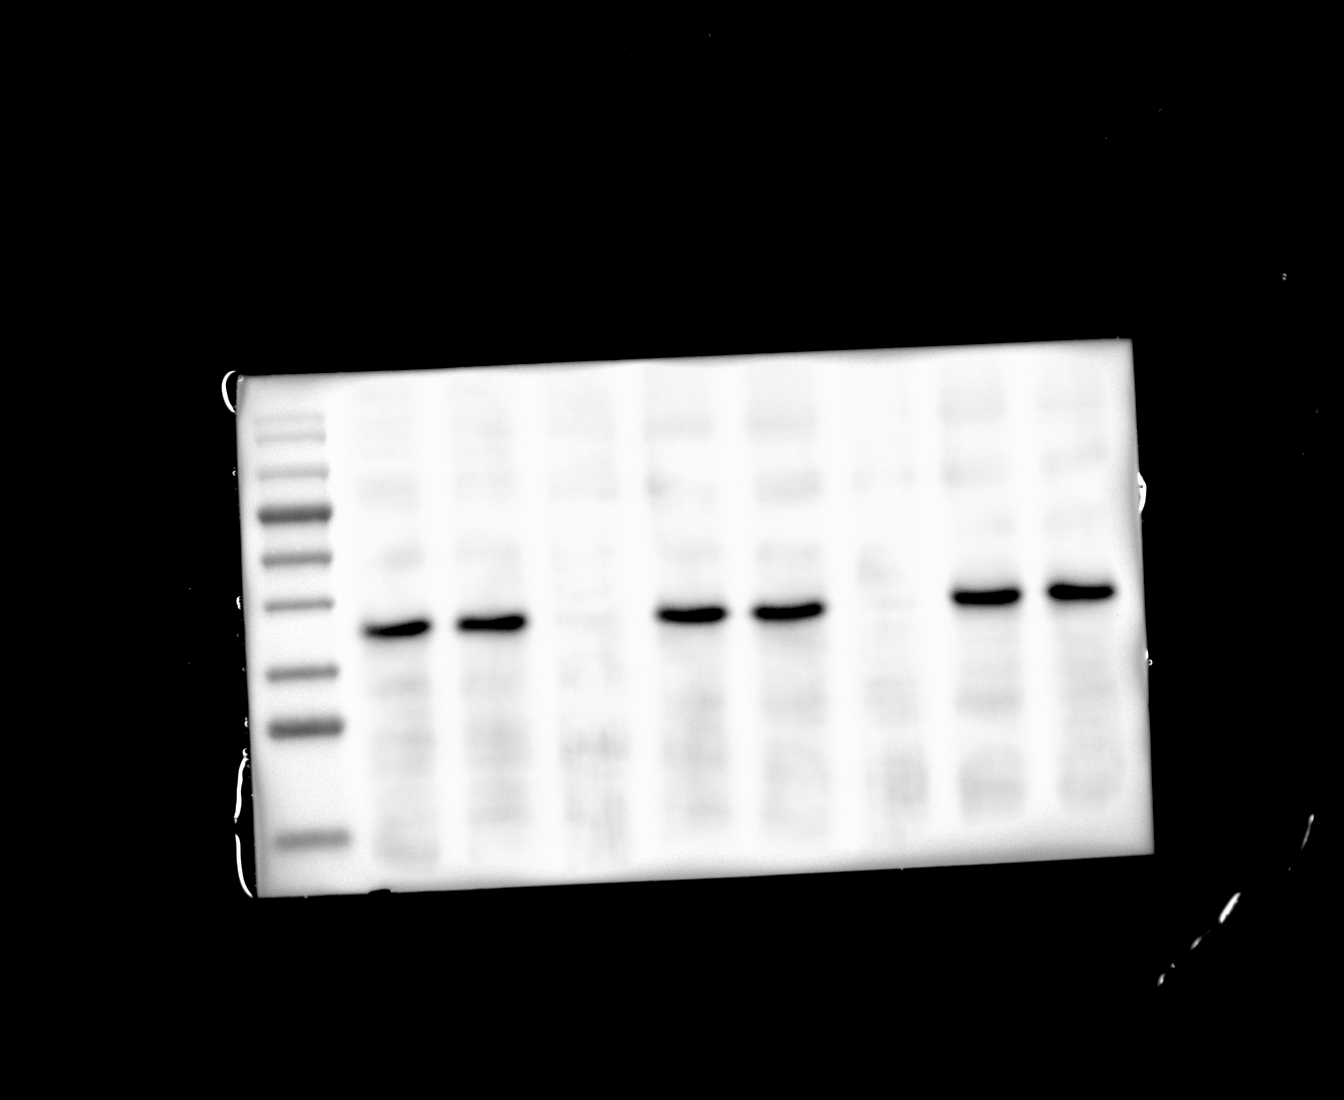
**

**β-actin**

**14-3-3η**

**Figure 5**

**A** **B**


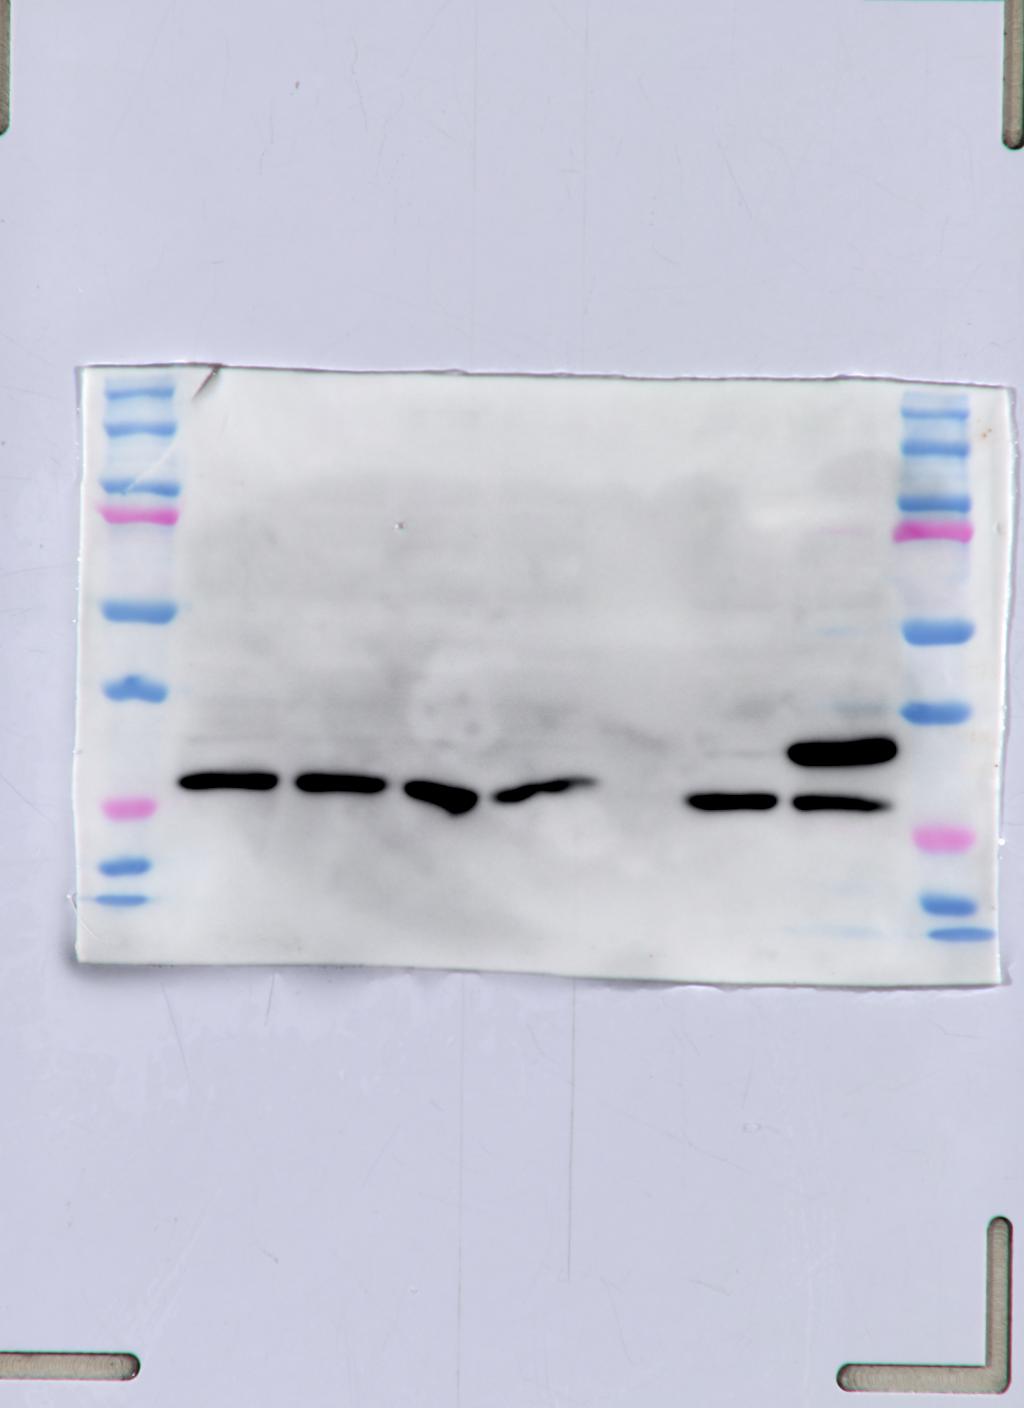


**14-3-3η-Flag**


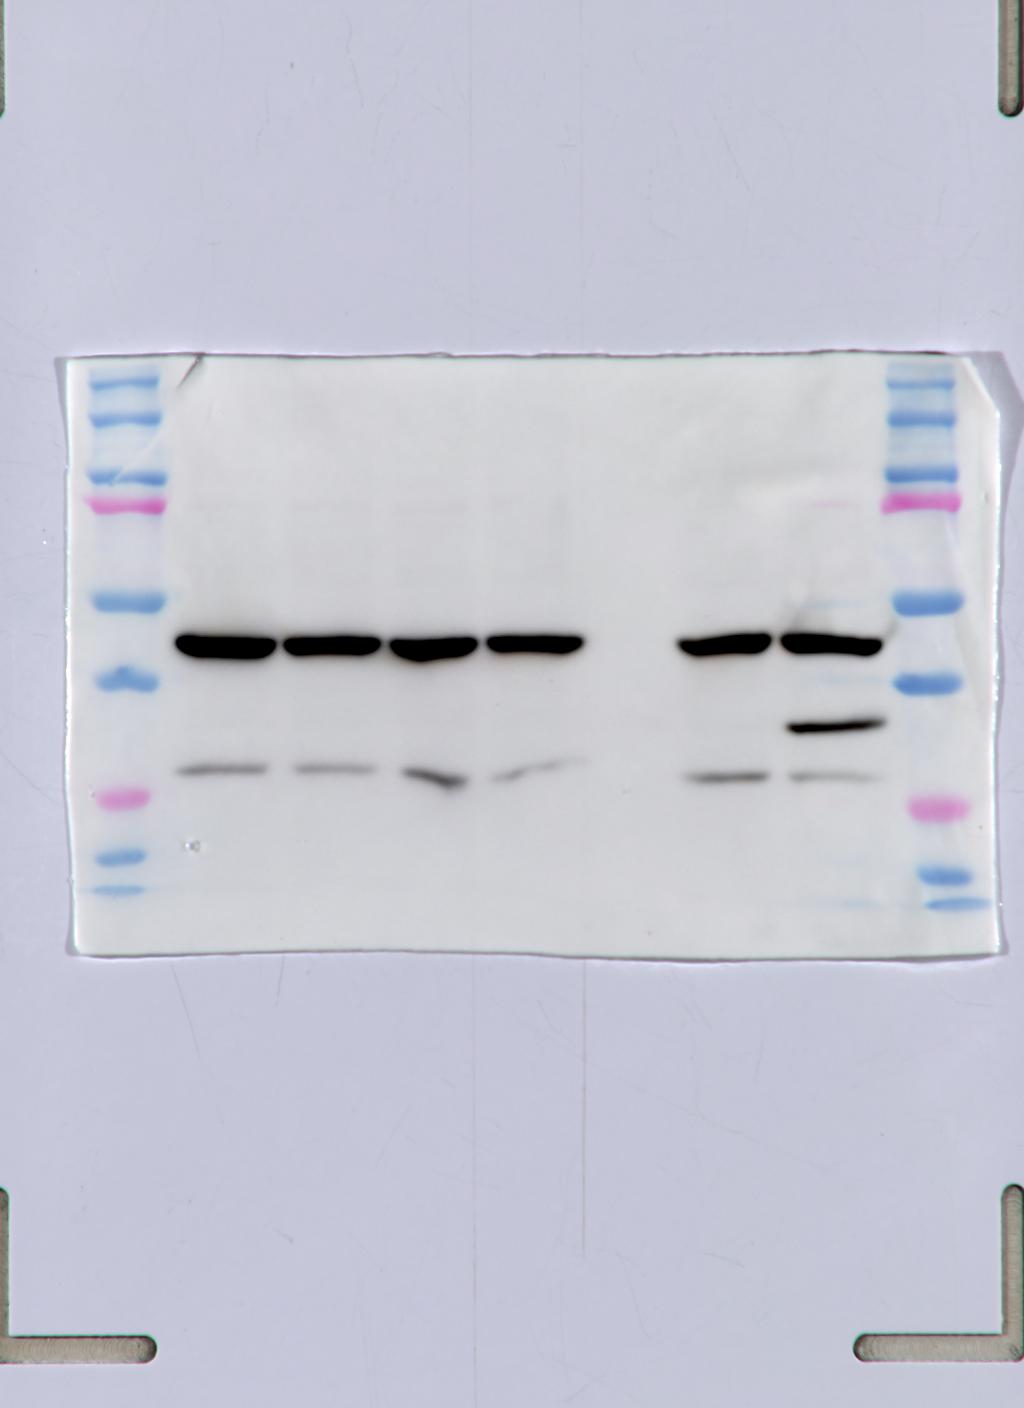


**β-actin**


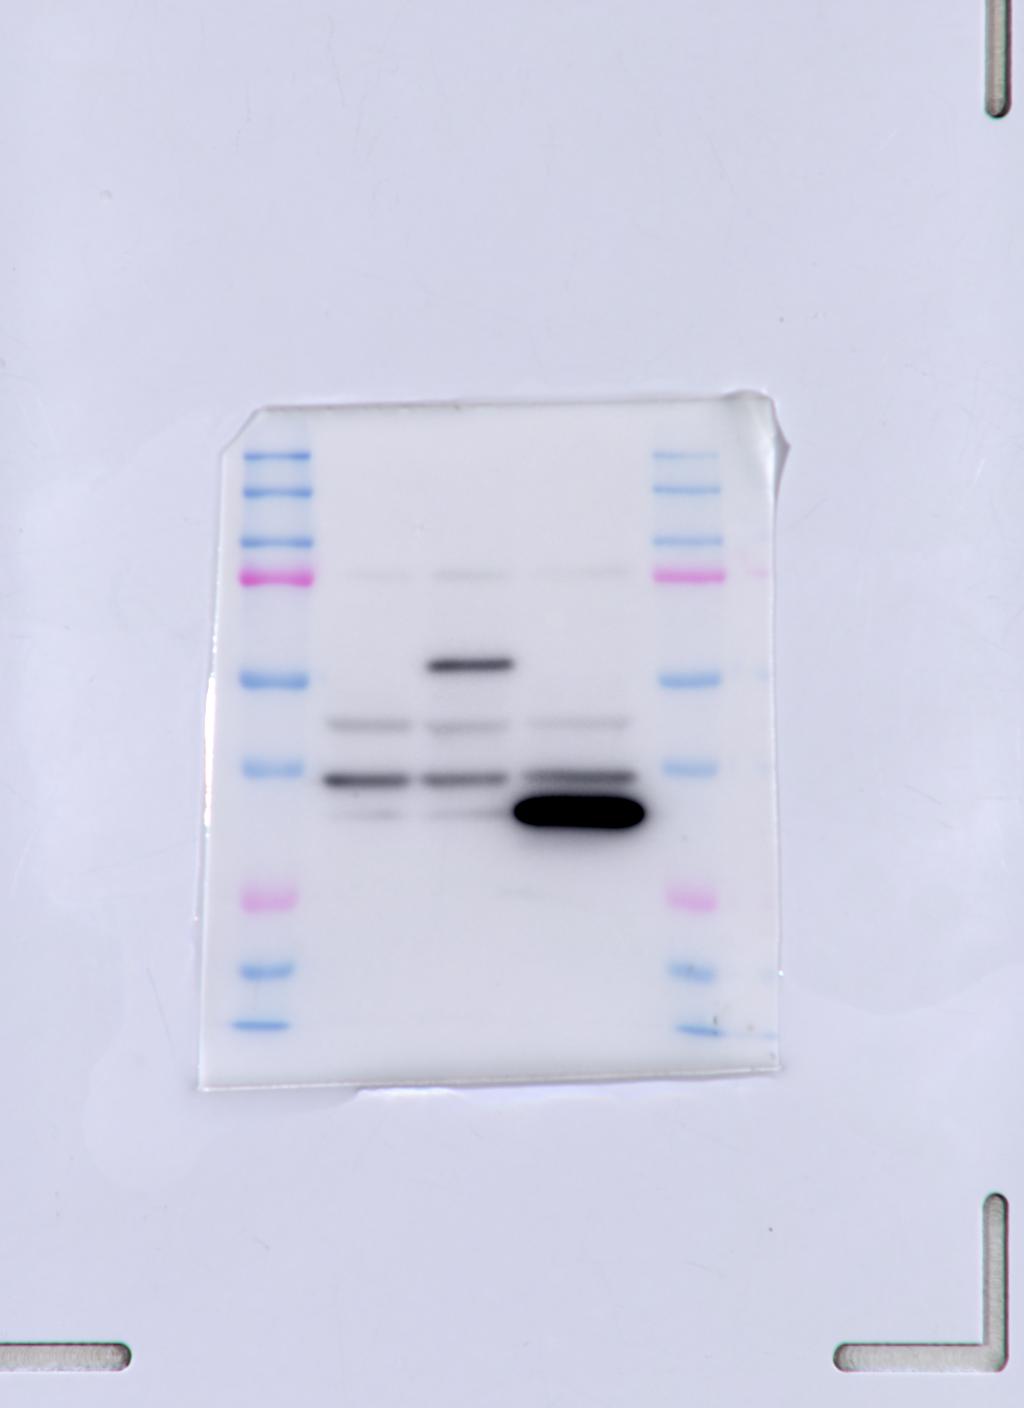

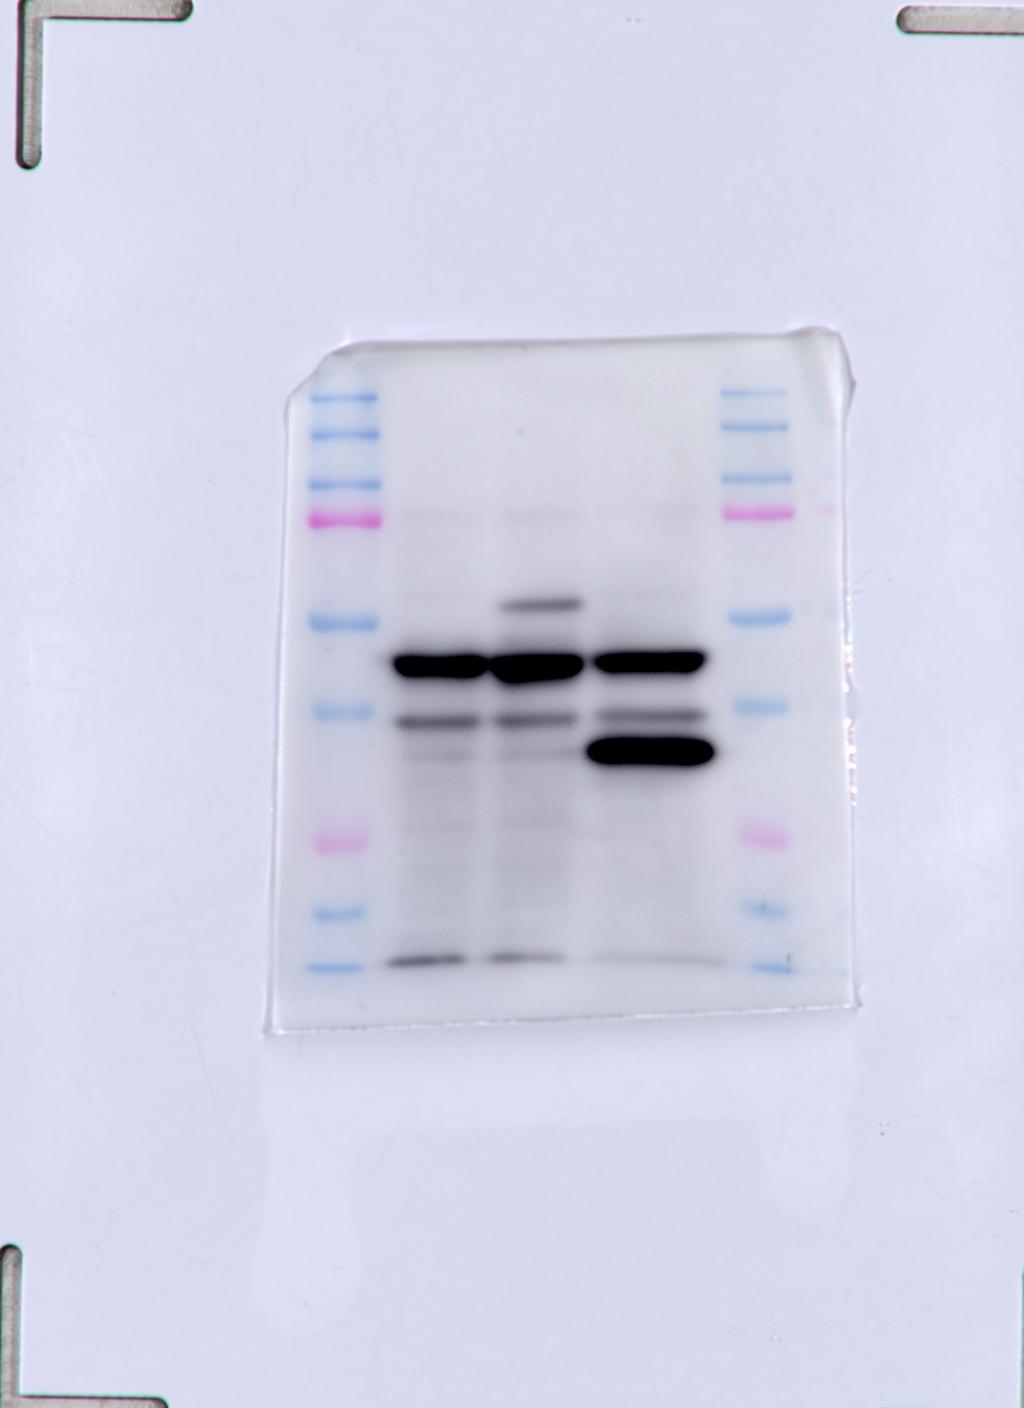


**14-3-3η-flag**

**actin**

**C**

**
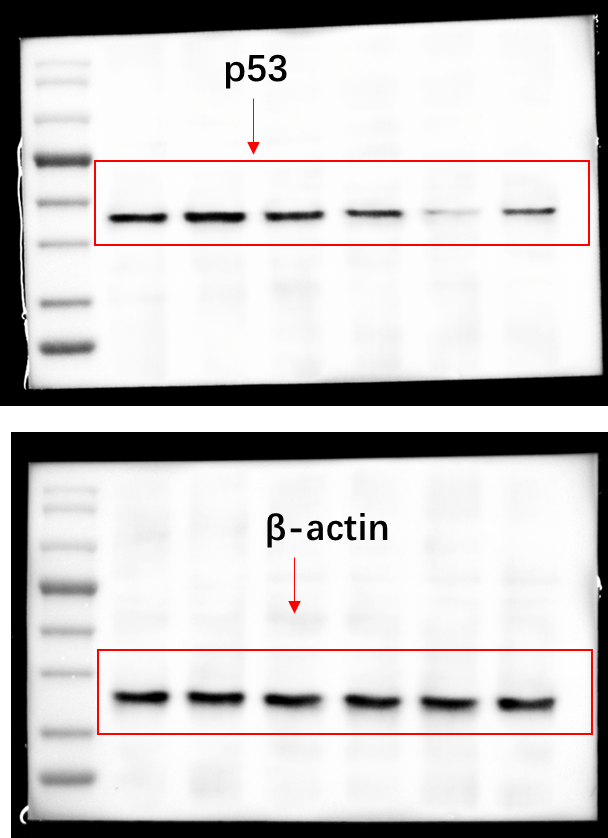
**

**D**

**
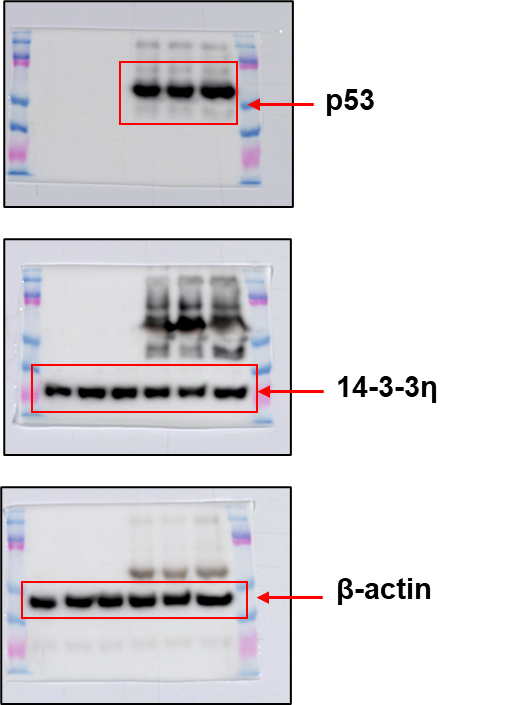
**

**E**

**
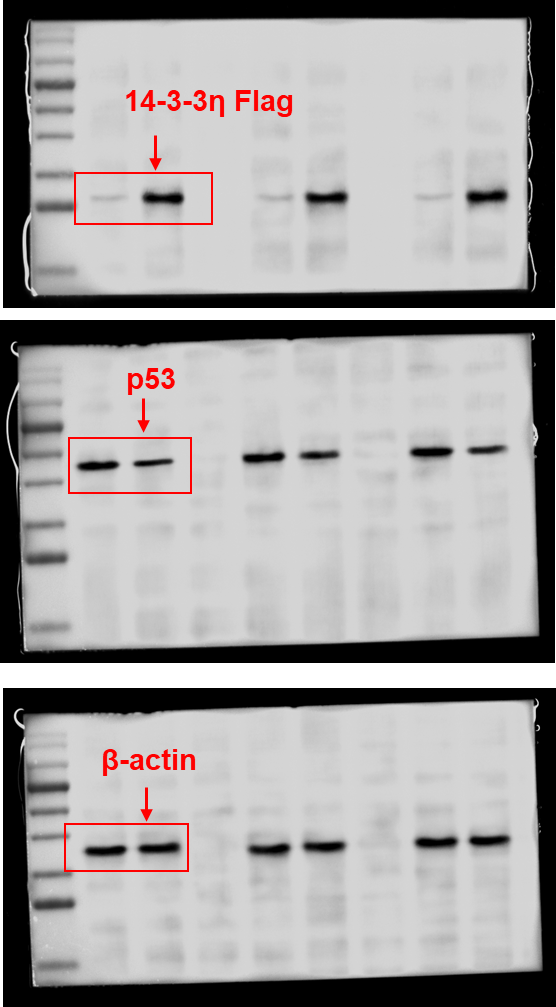
**

**
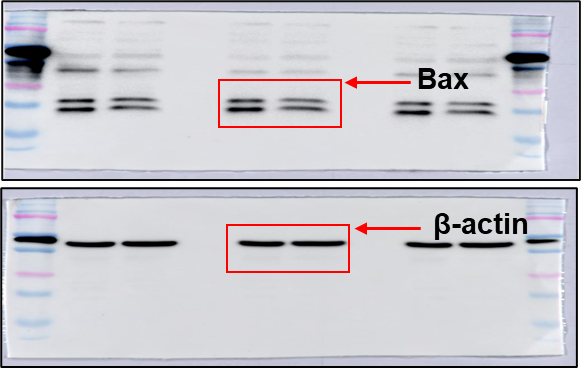
**

**
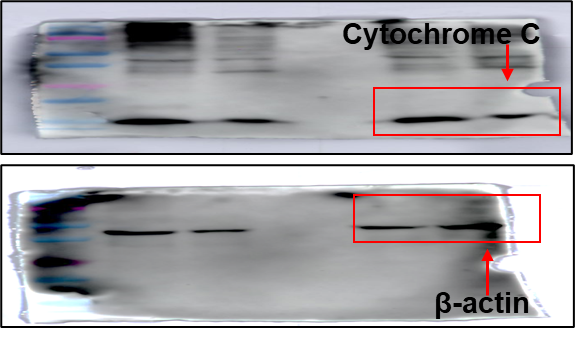
**

**
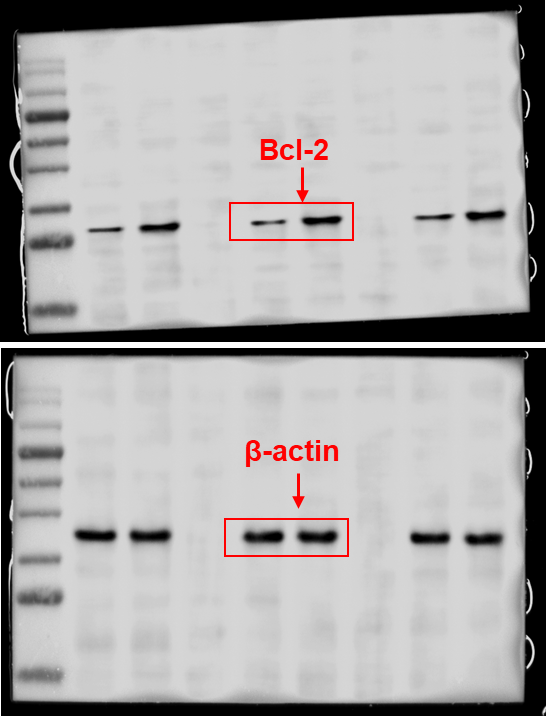
**

**
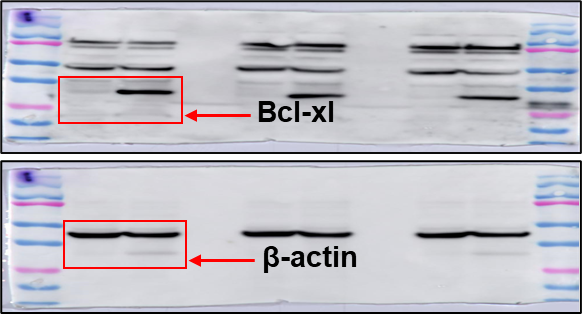
**

**F**

**
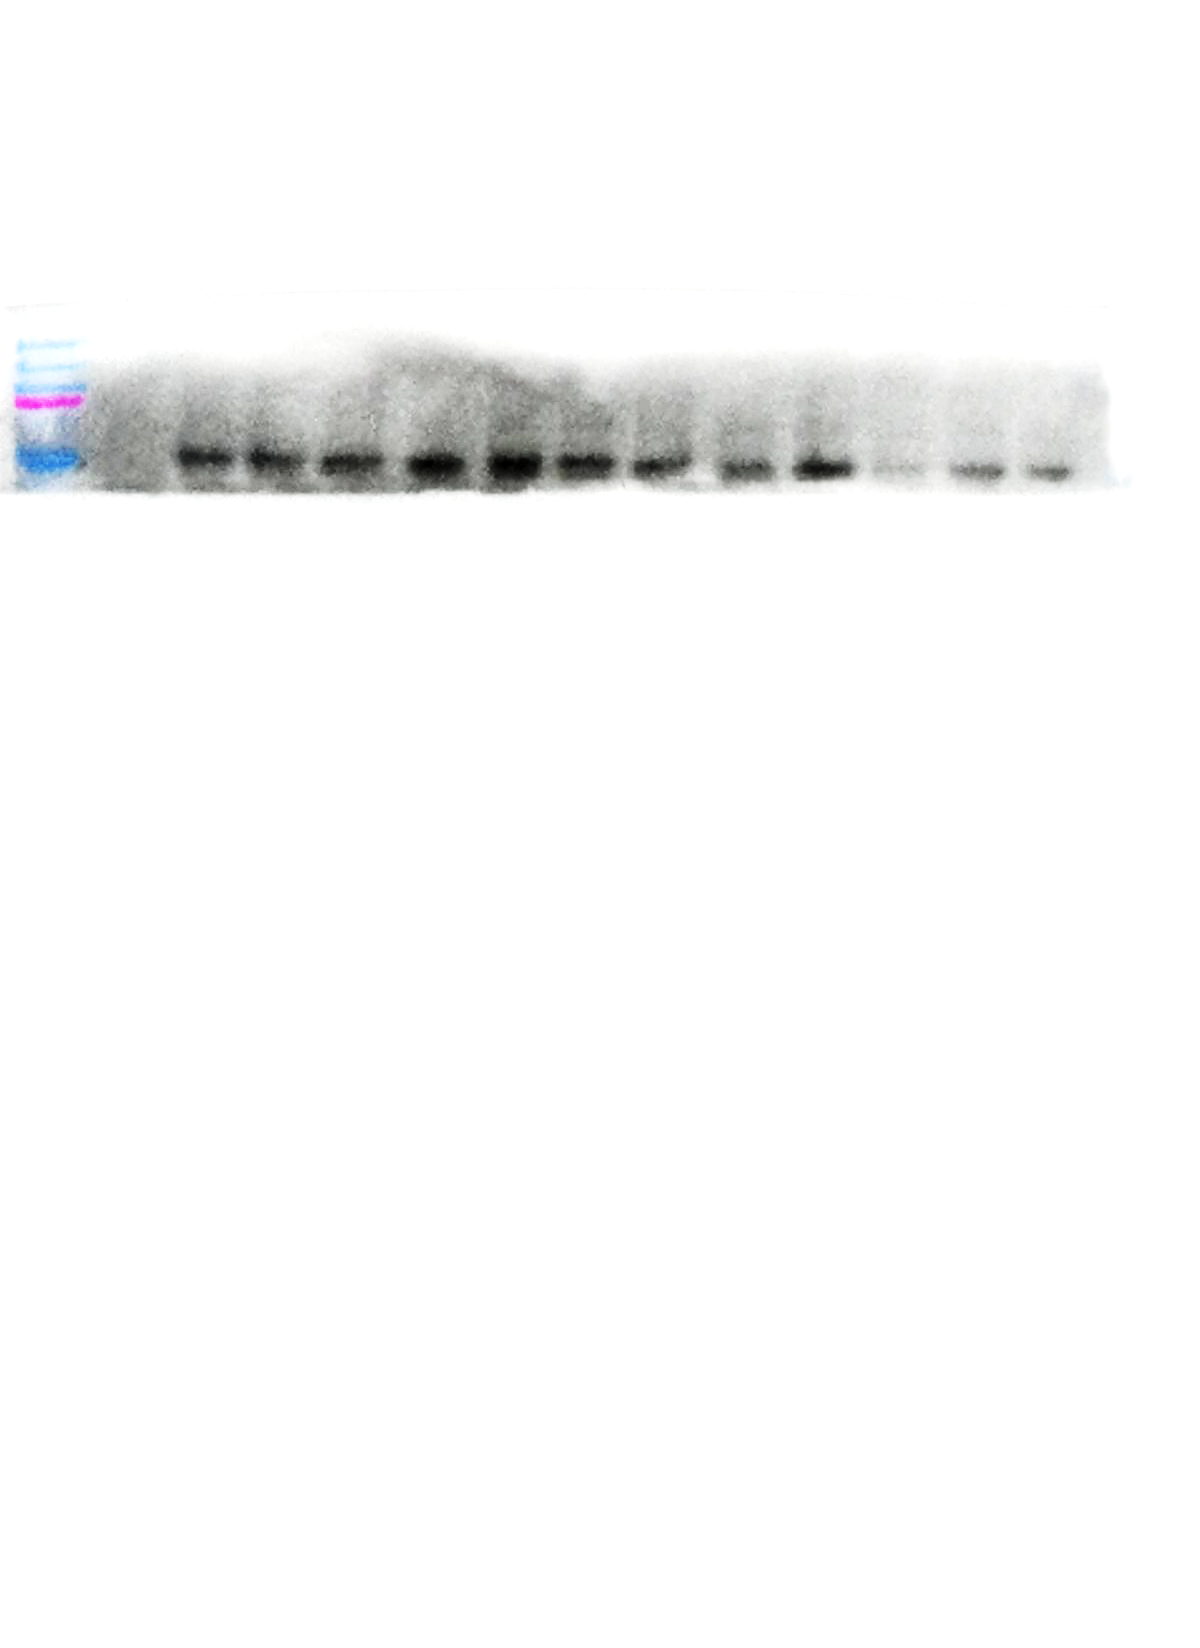

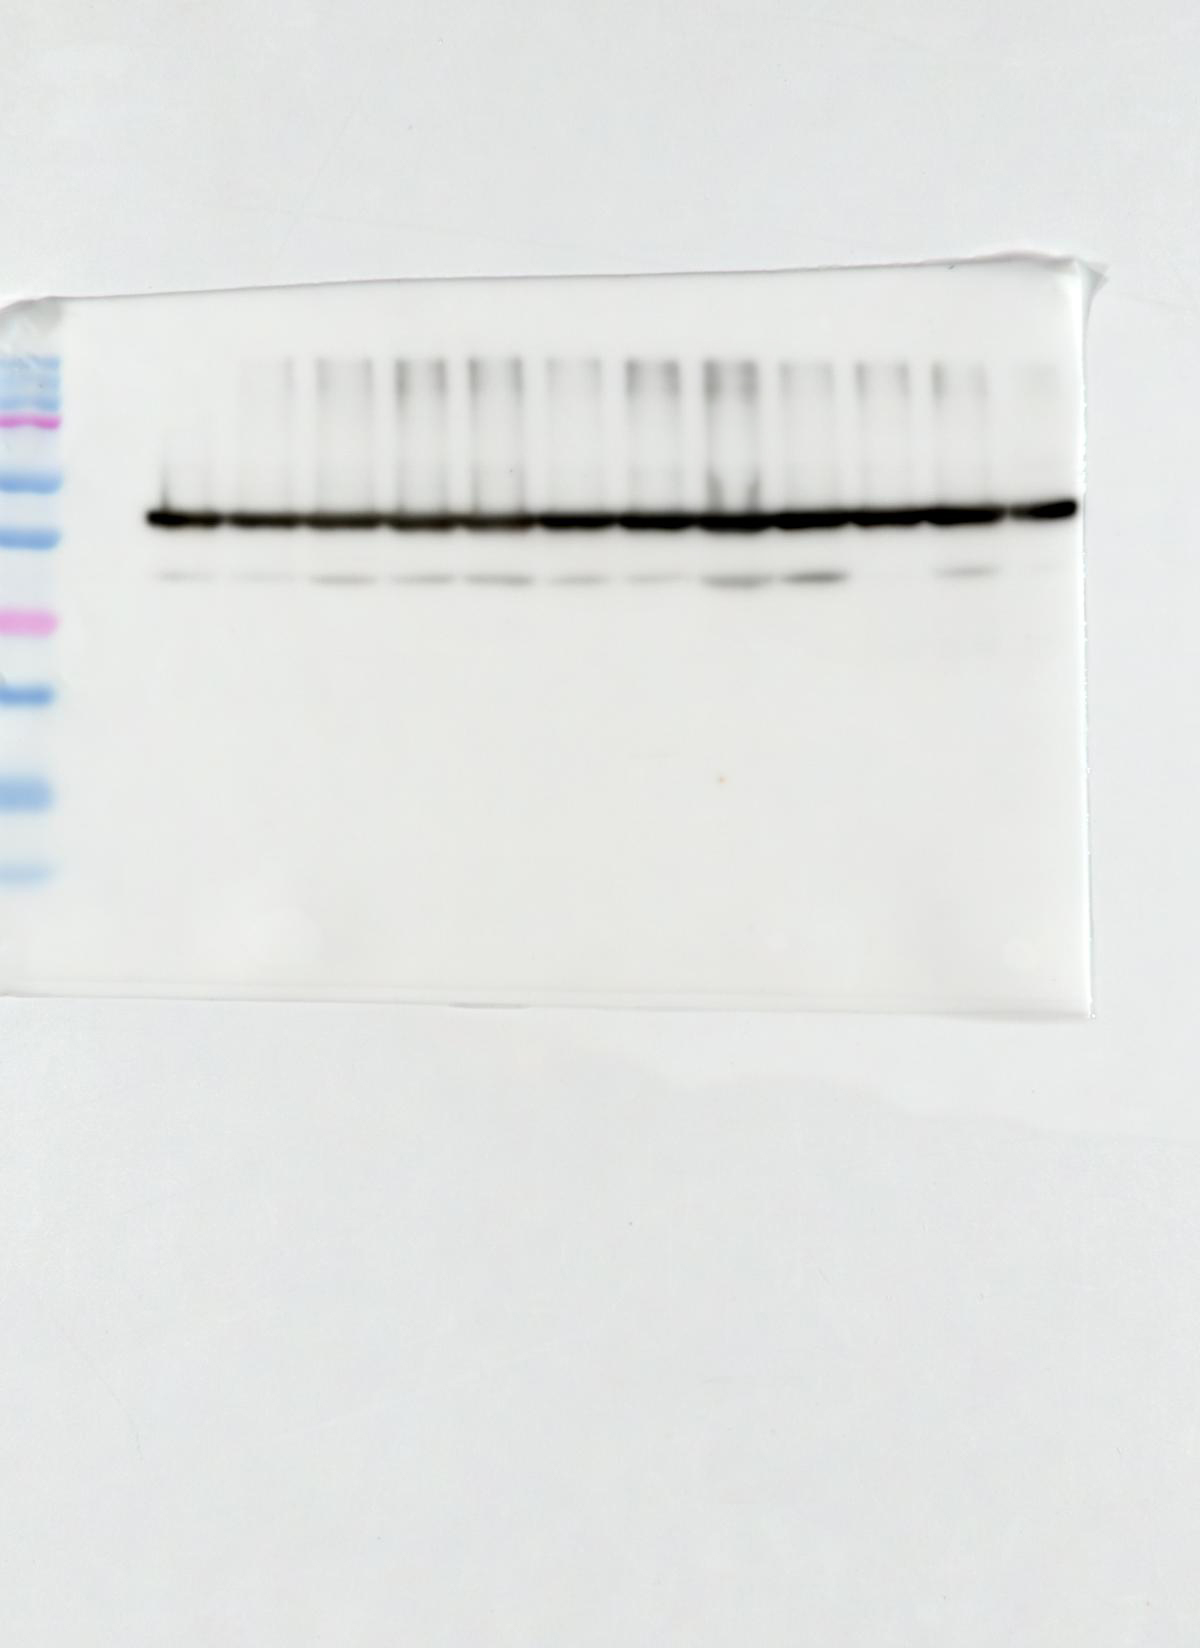
**

**GAPDH**

**G**


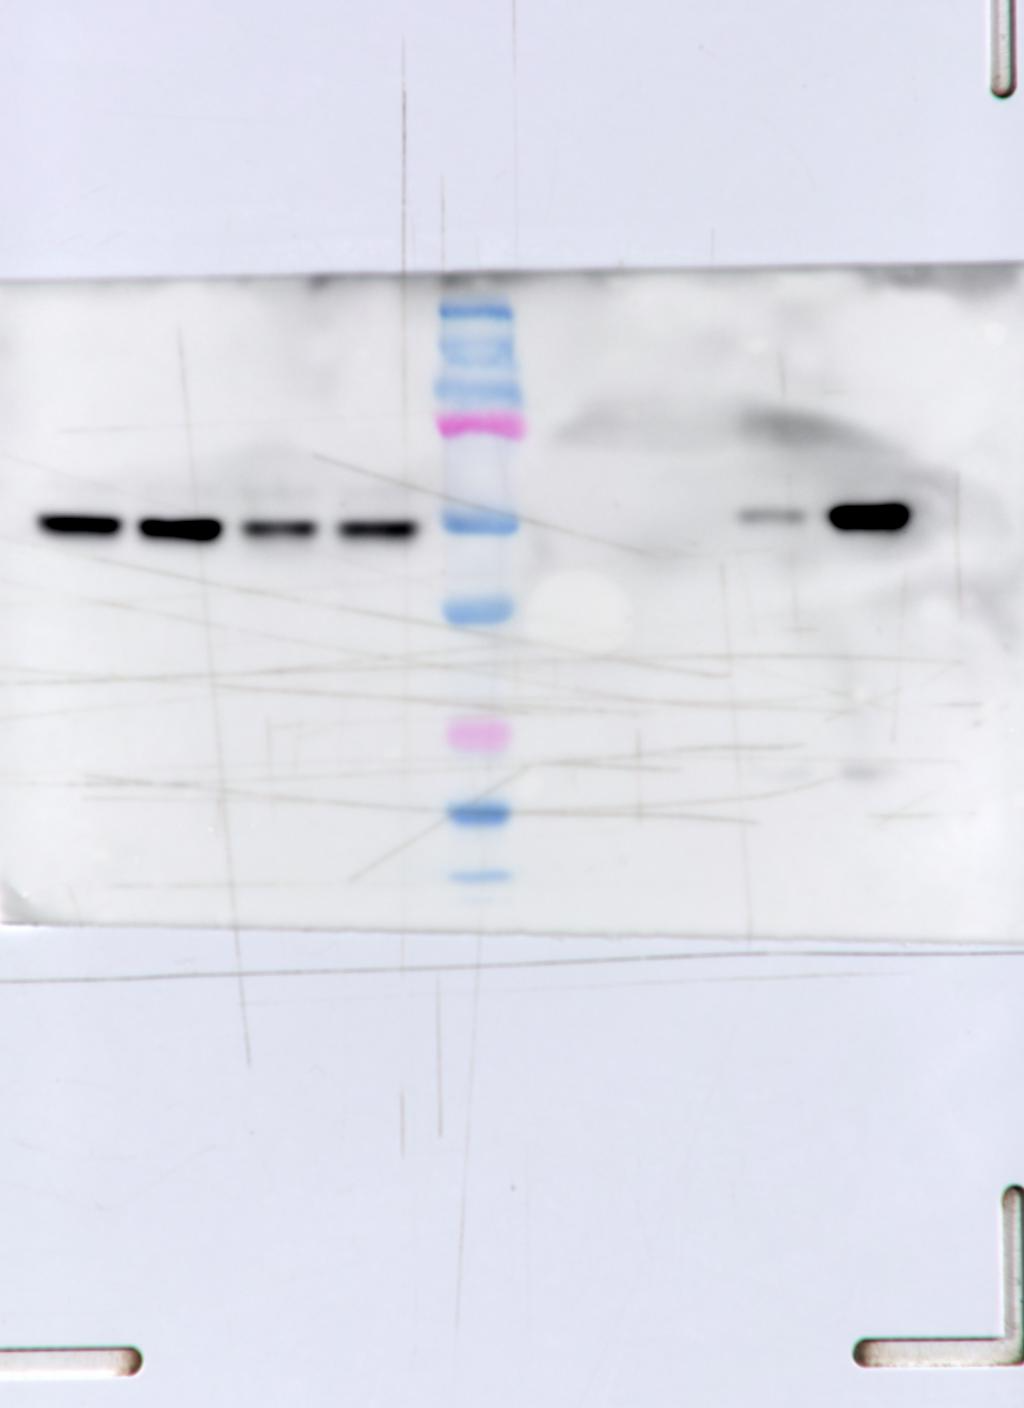


**p53**


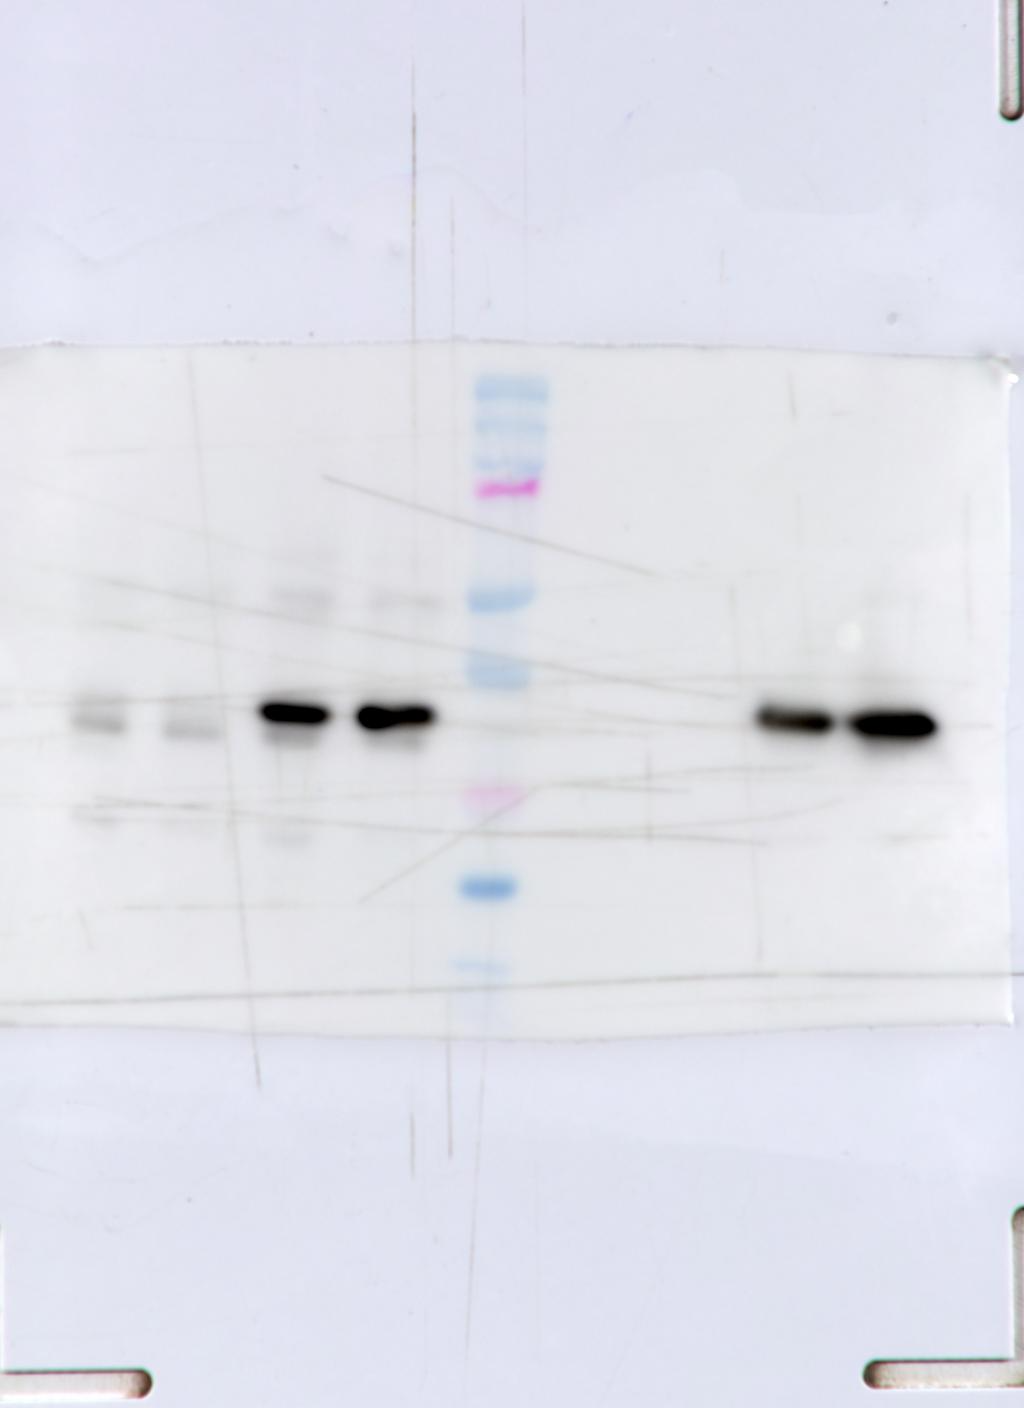

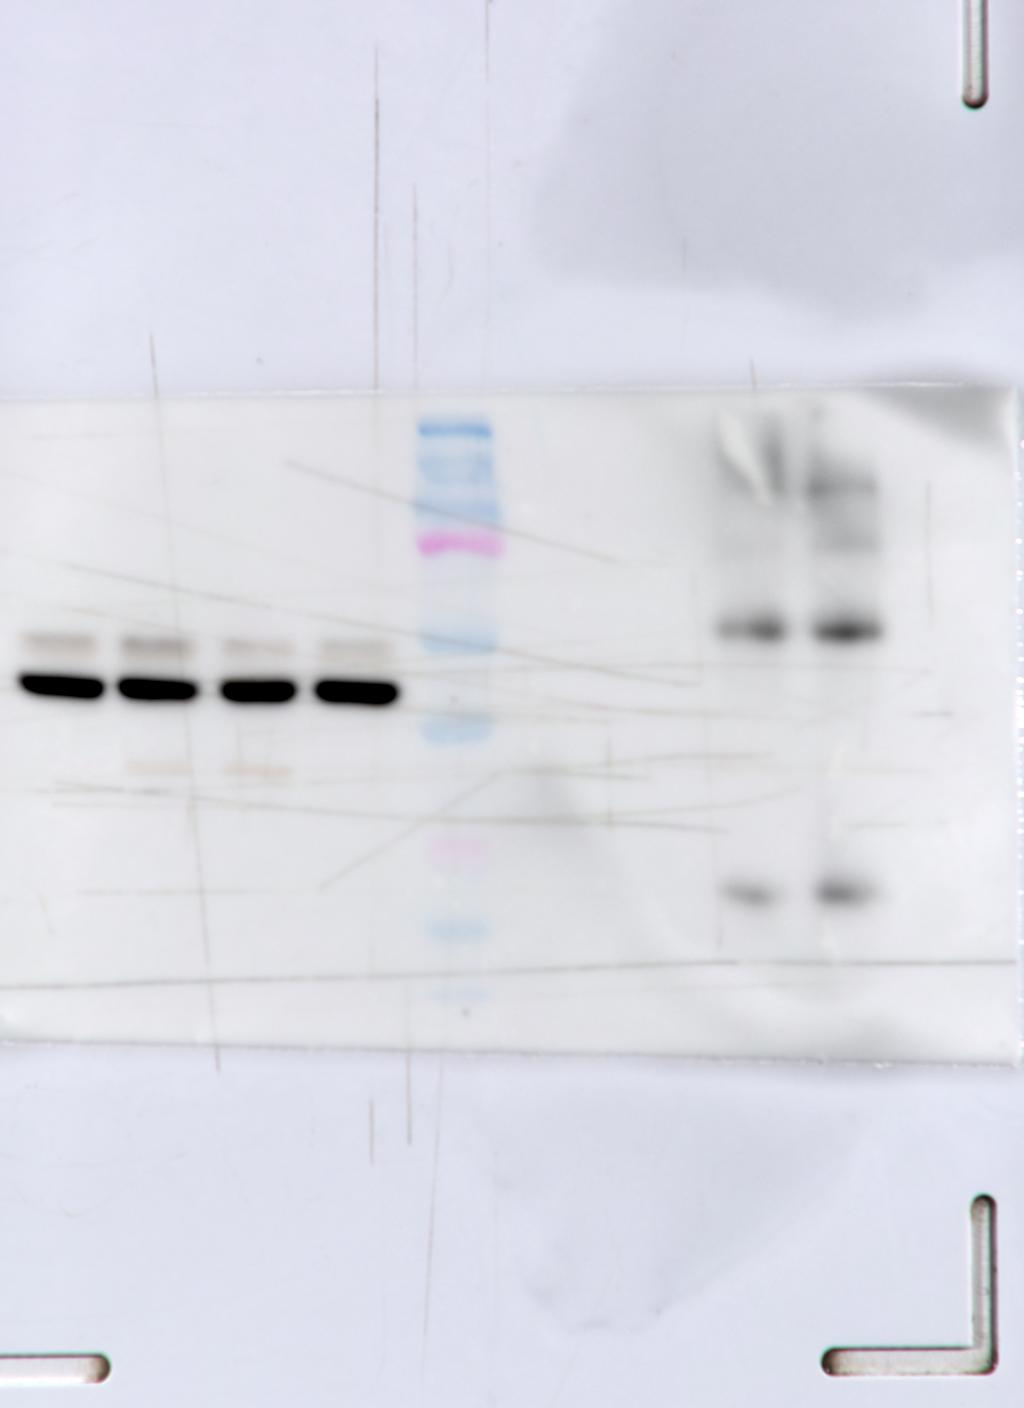


**14-3-3η**

**Actin**


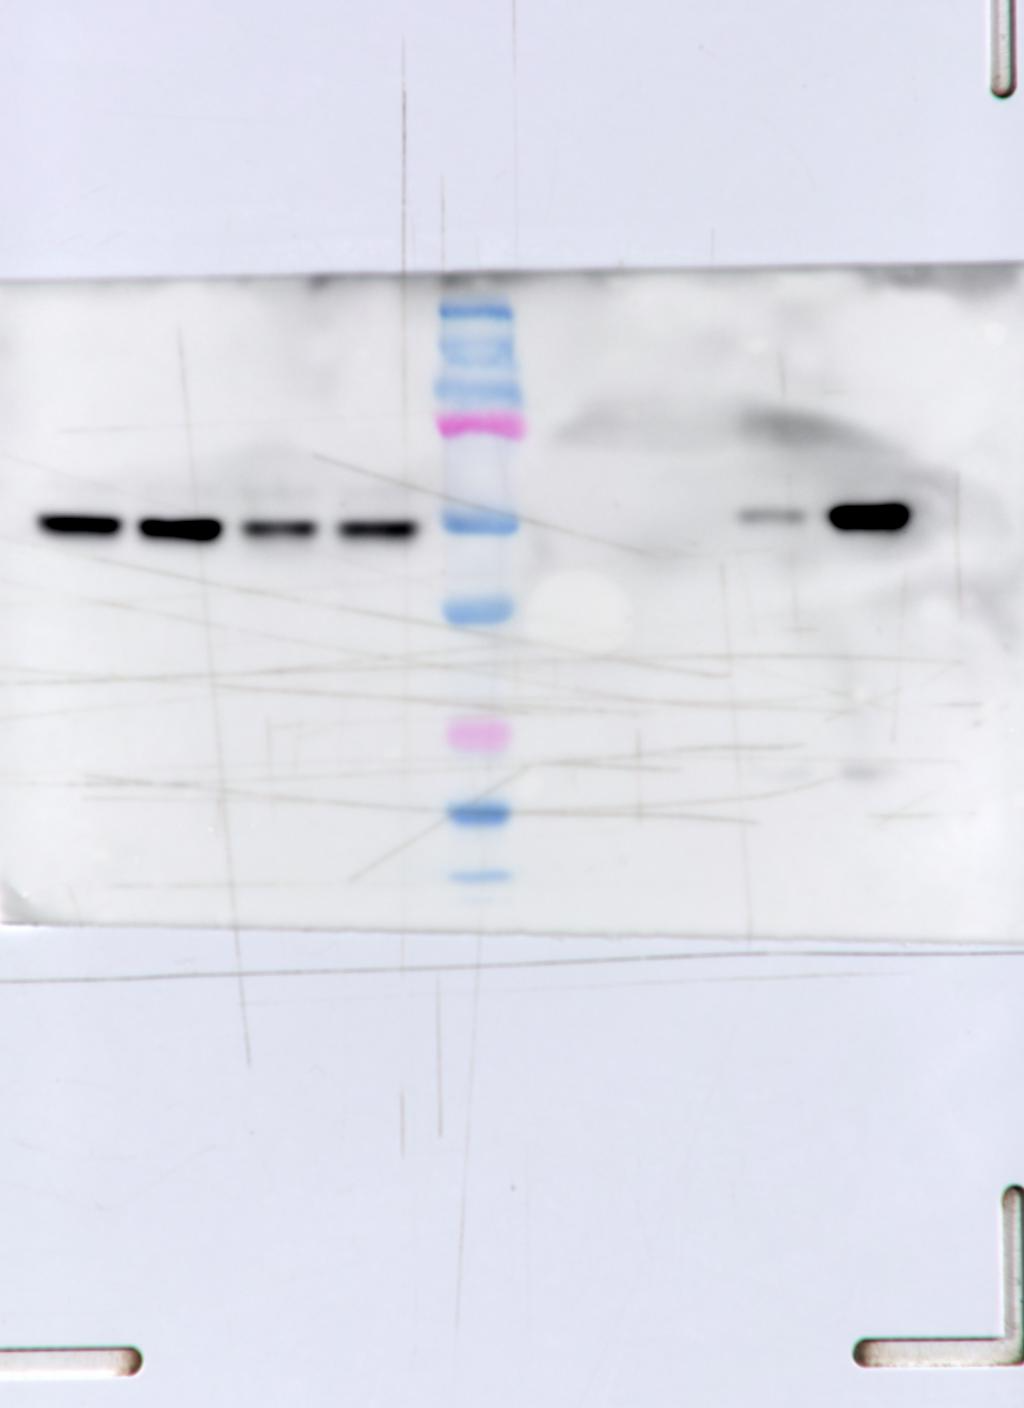


**p53**


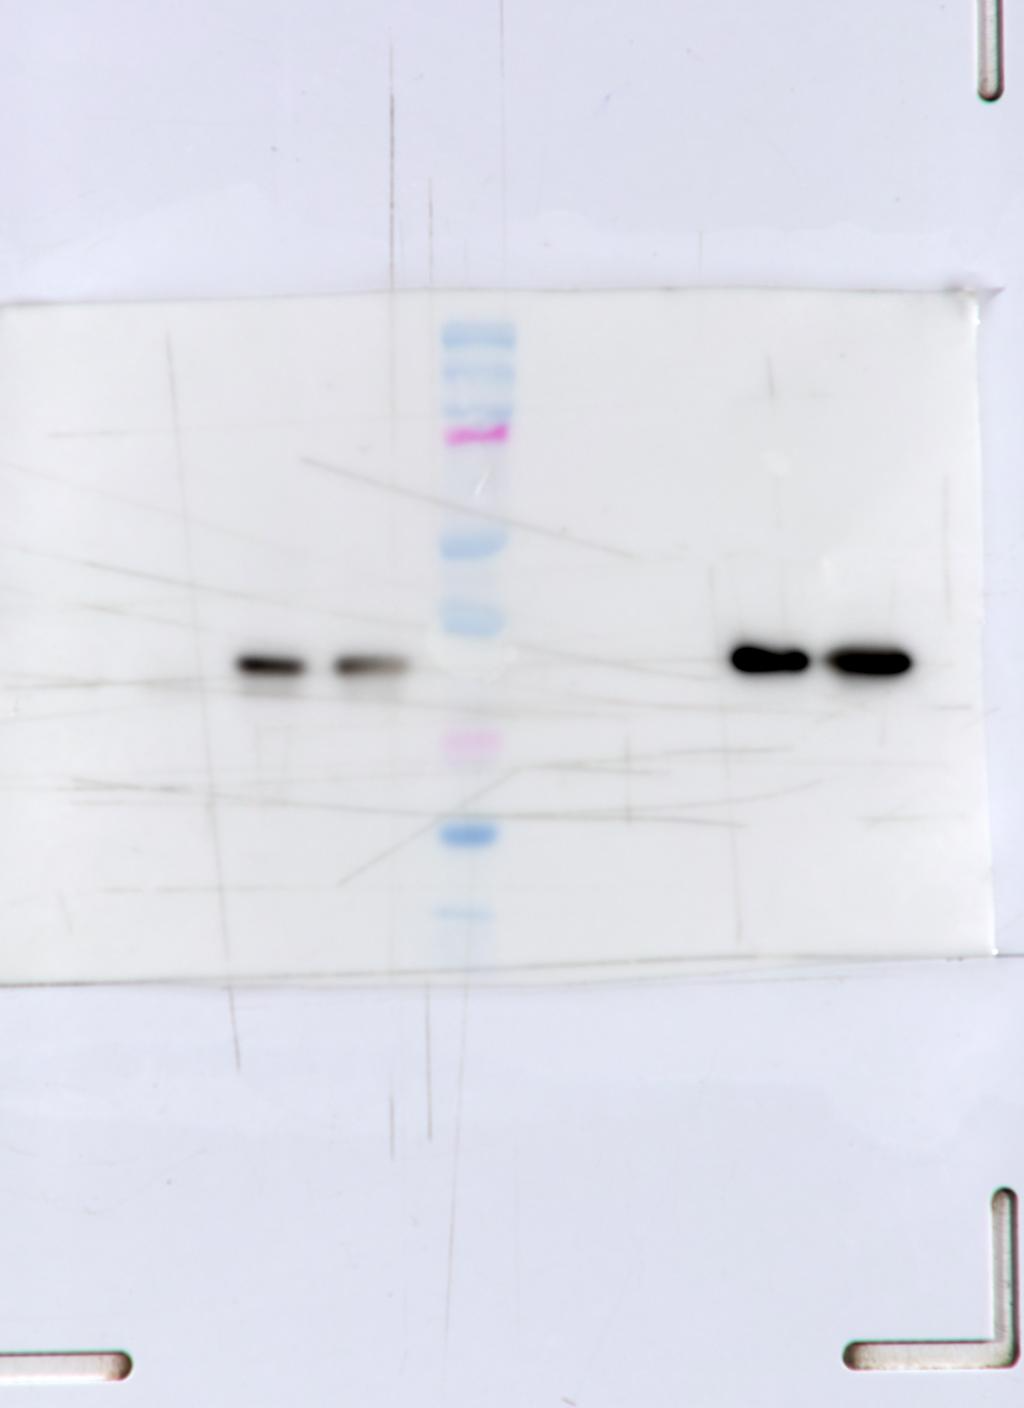


**14-3-3η**


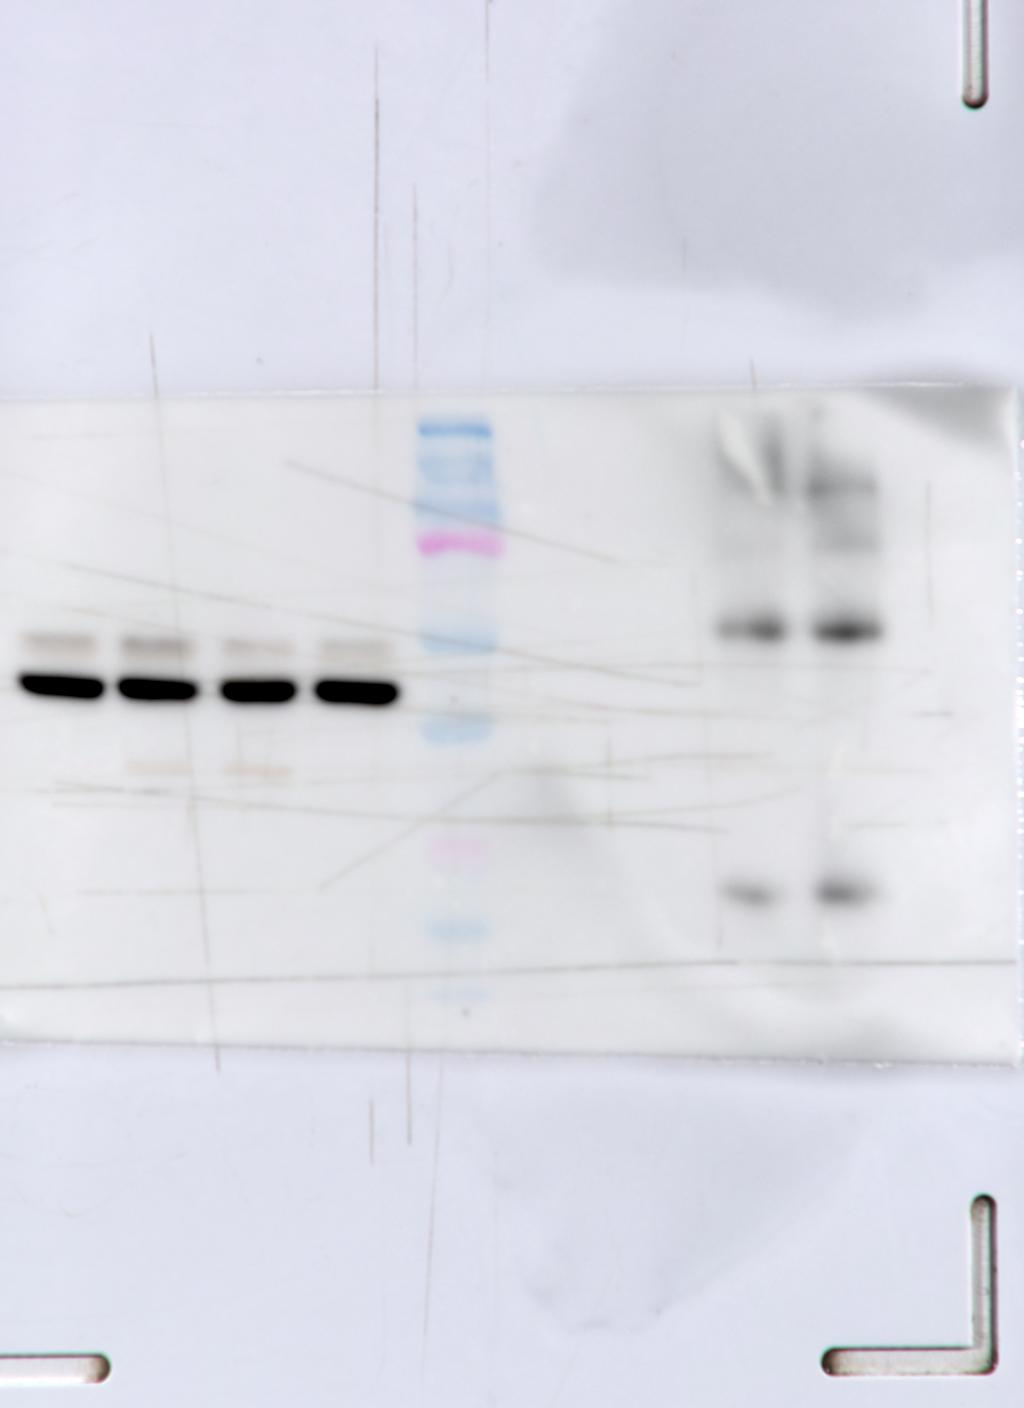


**Actin**
